# Supplementary material
Source: PubMed Central journal article supplement (PMC11396662)

## Supplementary Data 1

Regional association plots of each significant locus from the EA GWAS meta-analysis of 137,136 PTSD cases and 1,085,746 controls. The x-axis represents the base pair (hg19) genetic position of SNPs. The y-axis represents  $-\log$  p-values of SNP association with PTSD. LD estimates of surrounding SNPs with the labeled index SNP (LD  $r^2$  values estimated based on 1KGP3 Europeans) is indicated by color (color bar on side of plot indicates color coding of  $r^2$  values). Local estimates of recombination rate are indicated in light blue (legend on vertical axis at right). Gene names, strands, and boundaries are shown in the box below the regional plot.

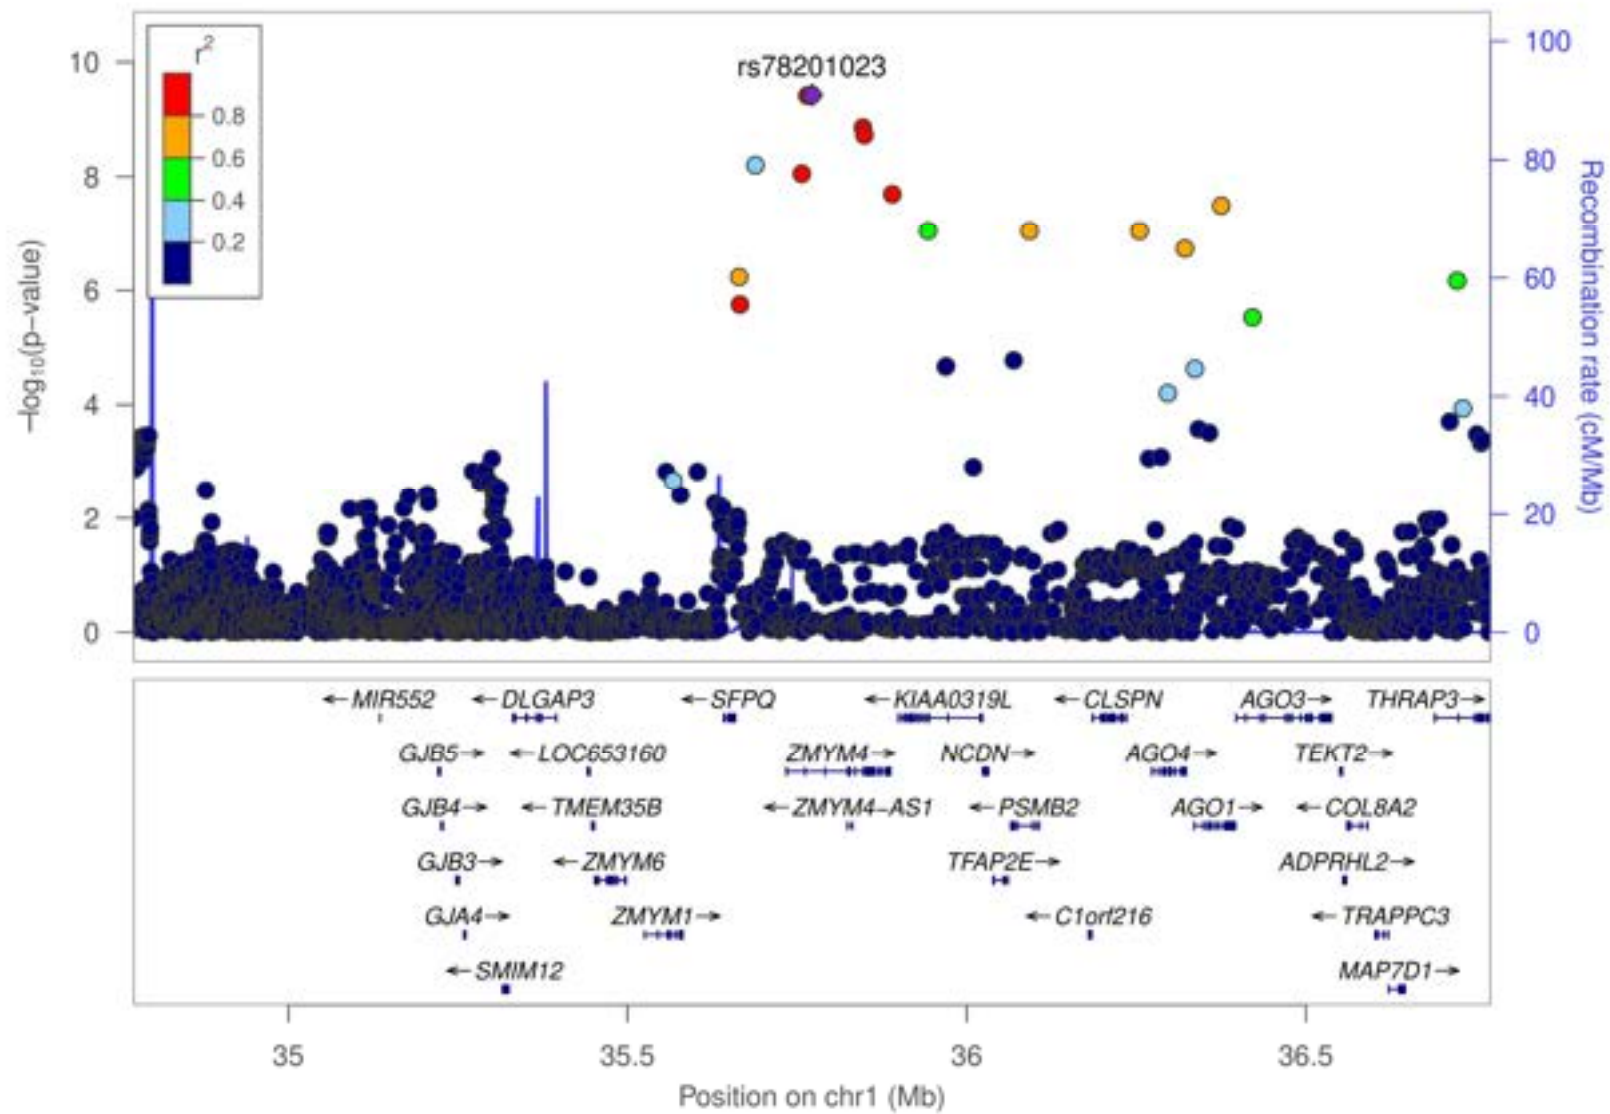

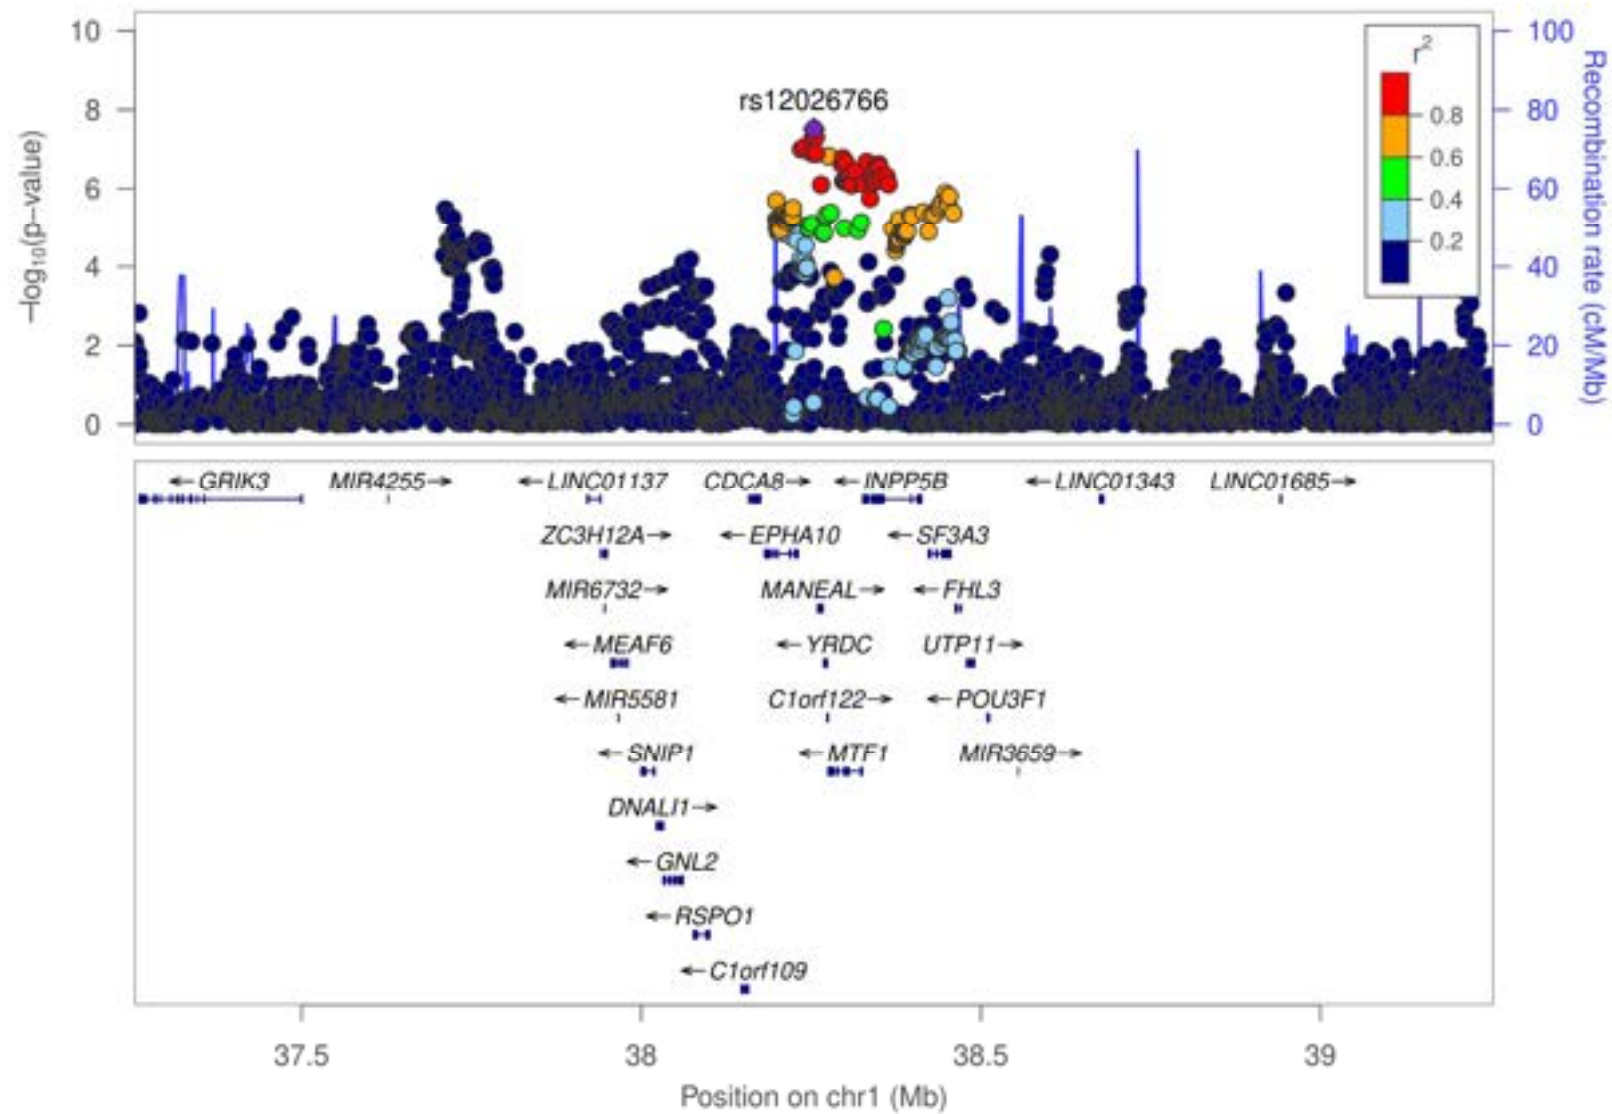

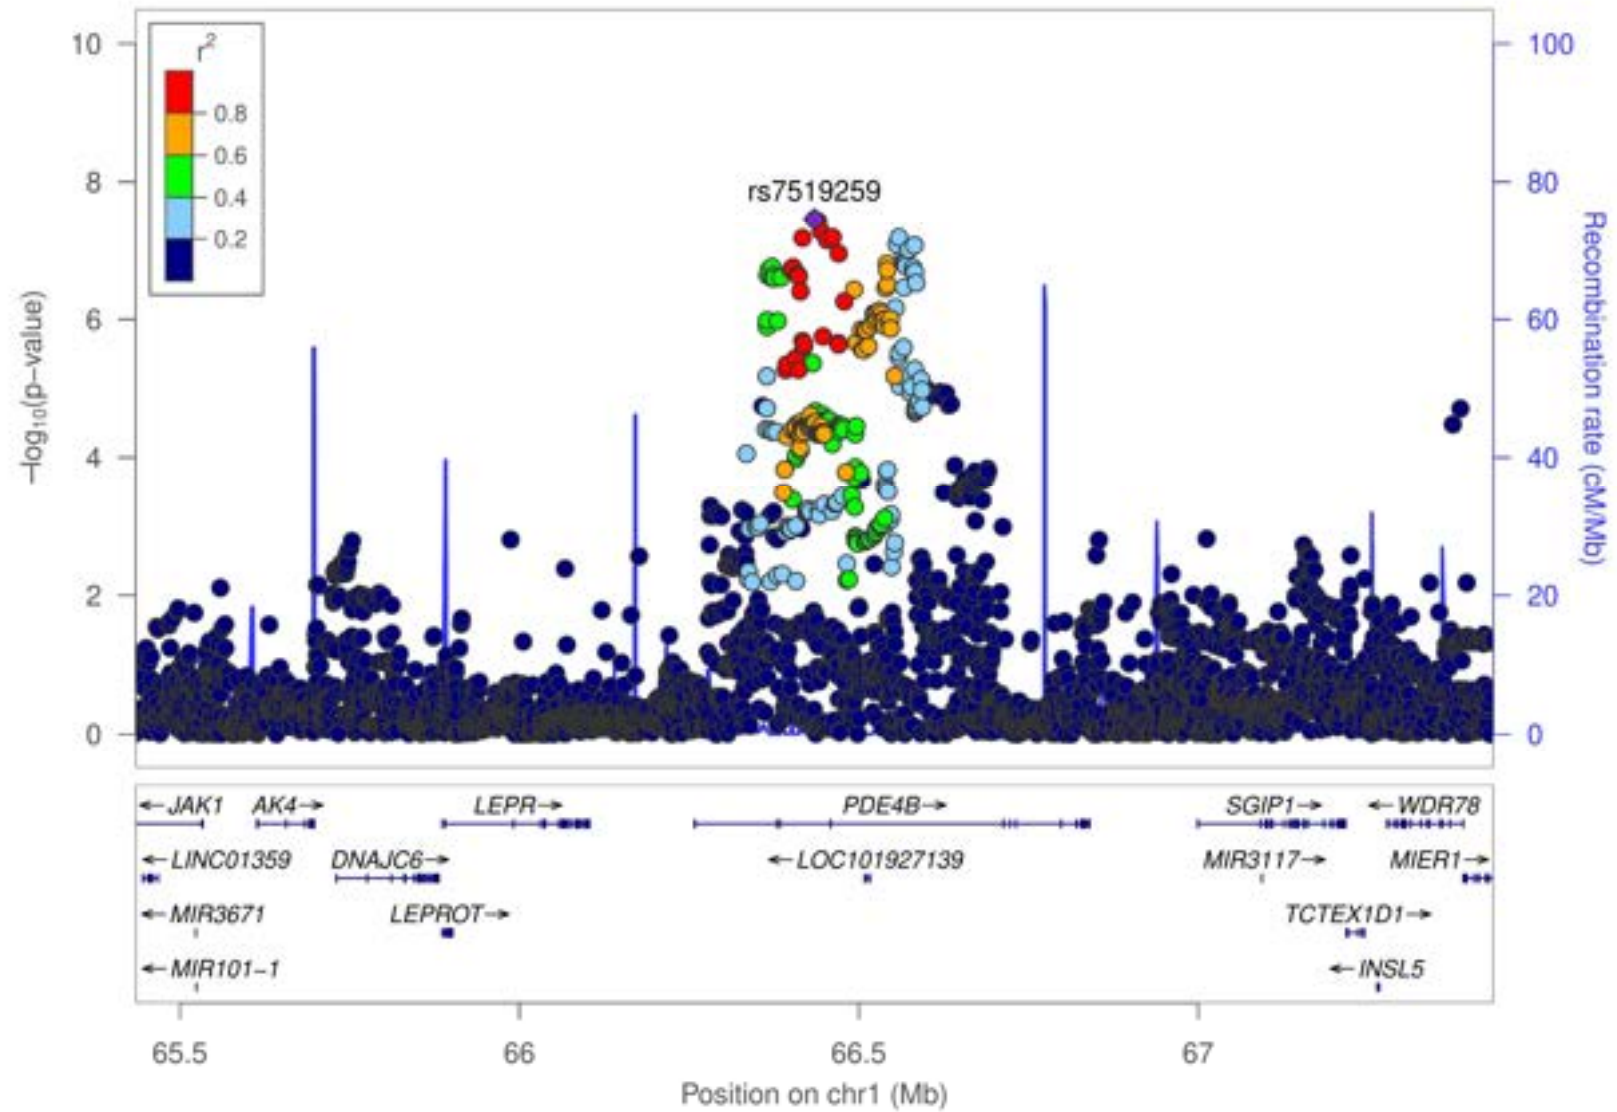

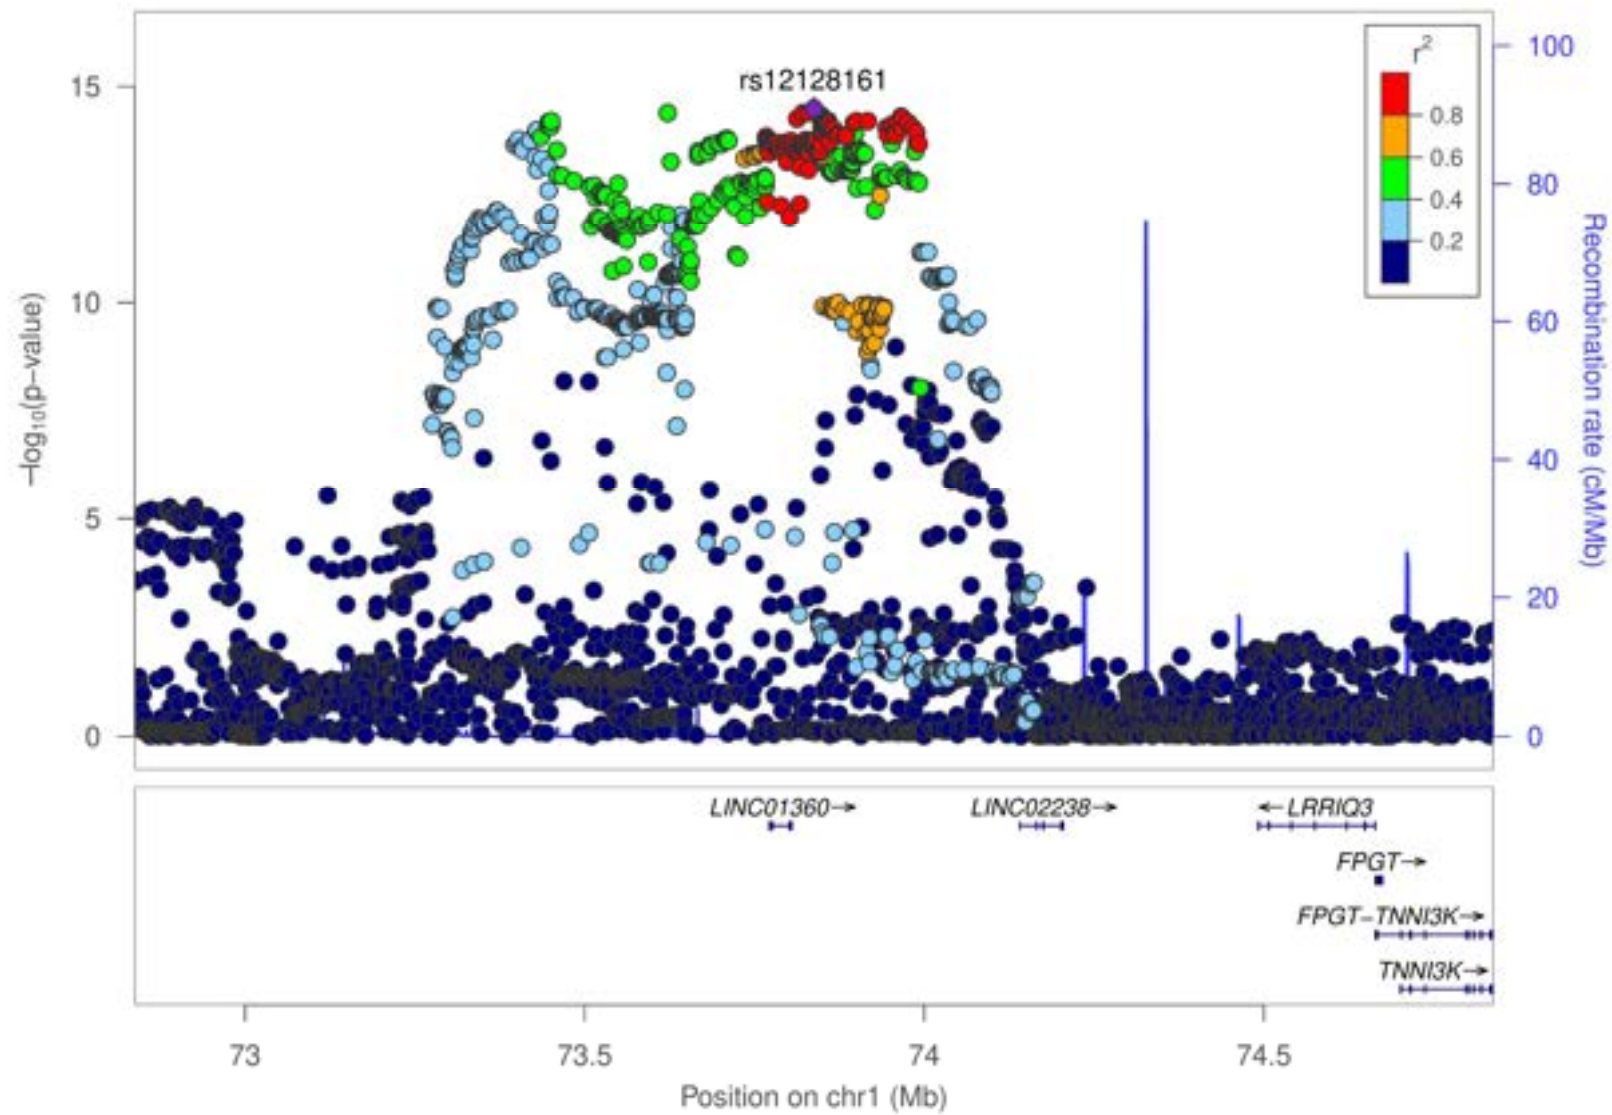

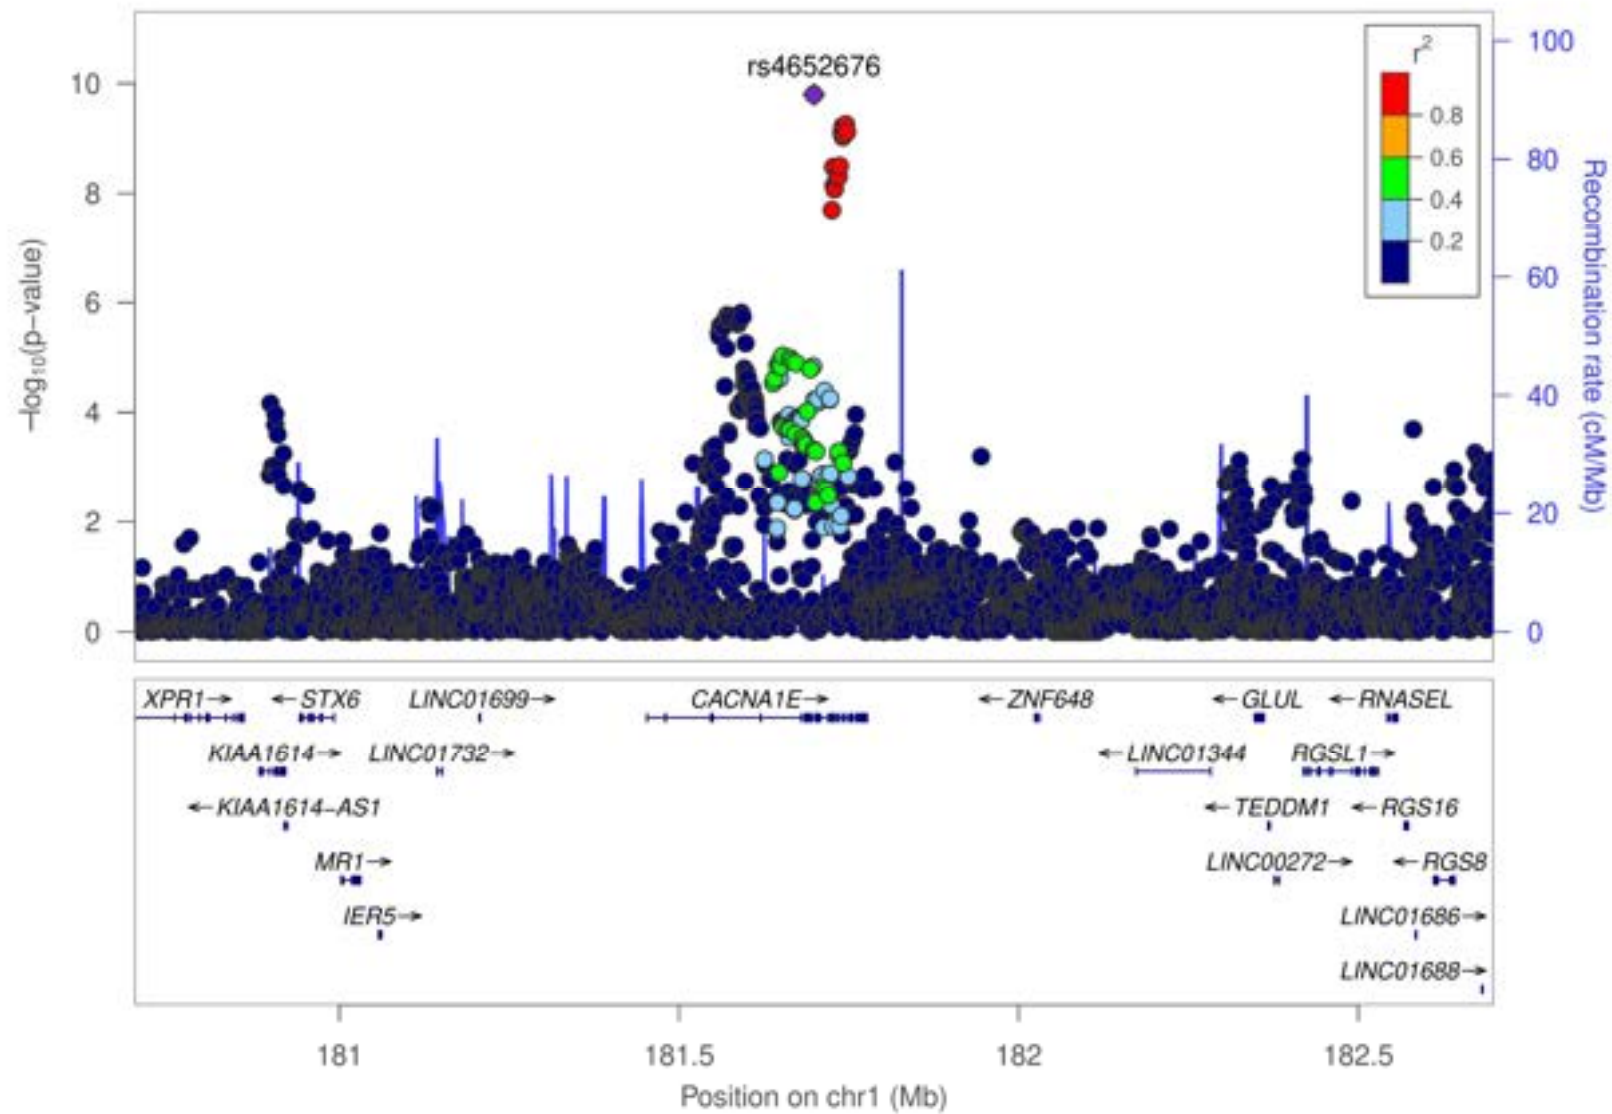

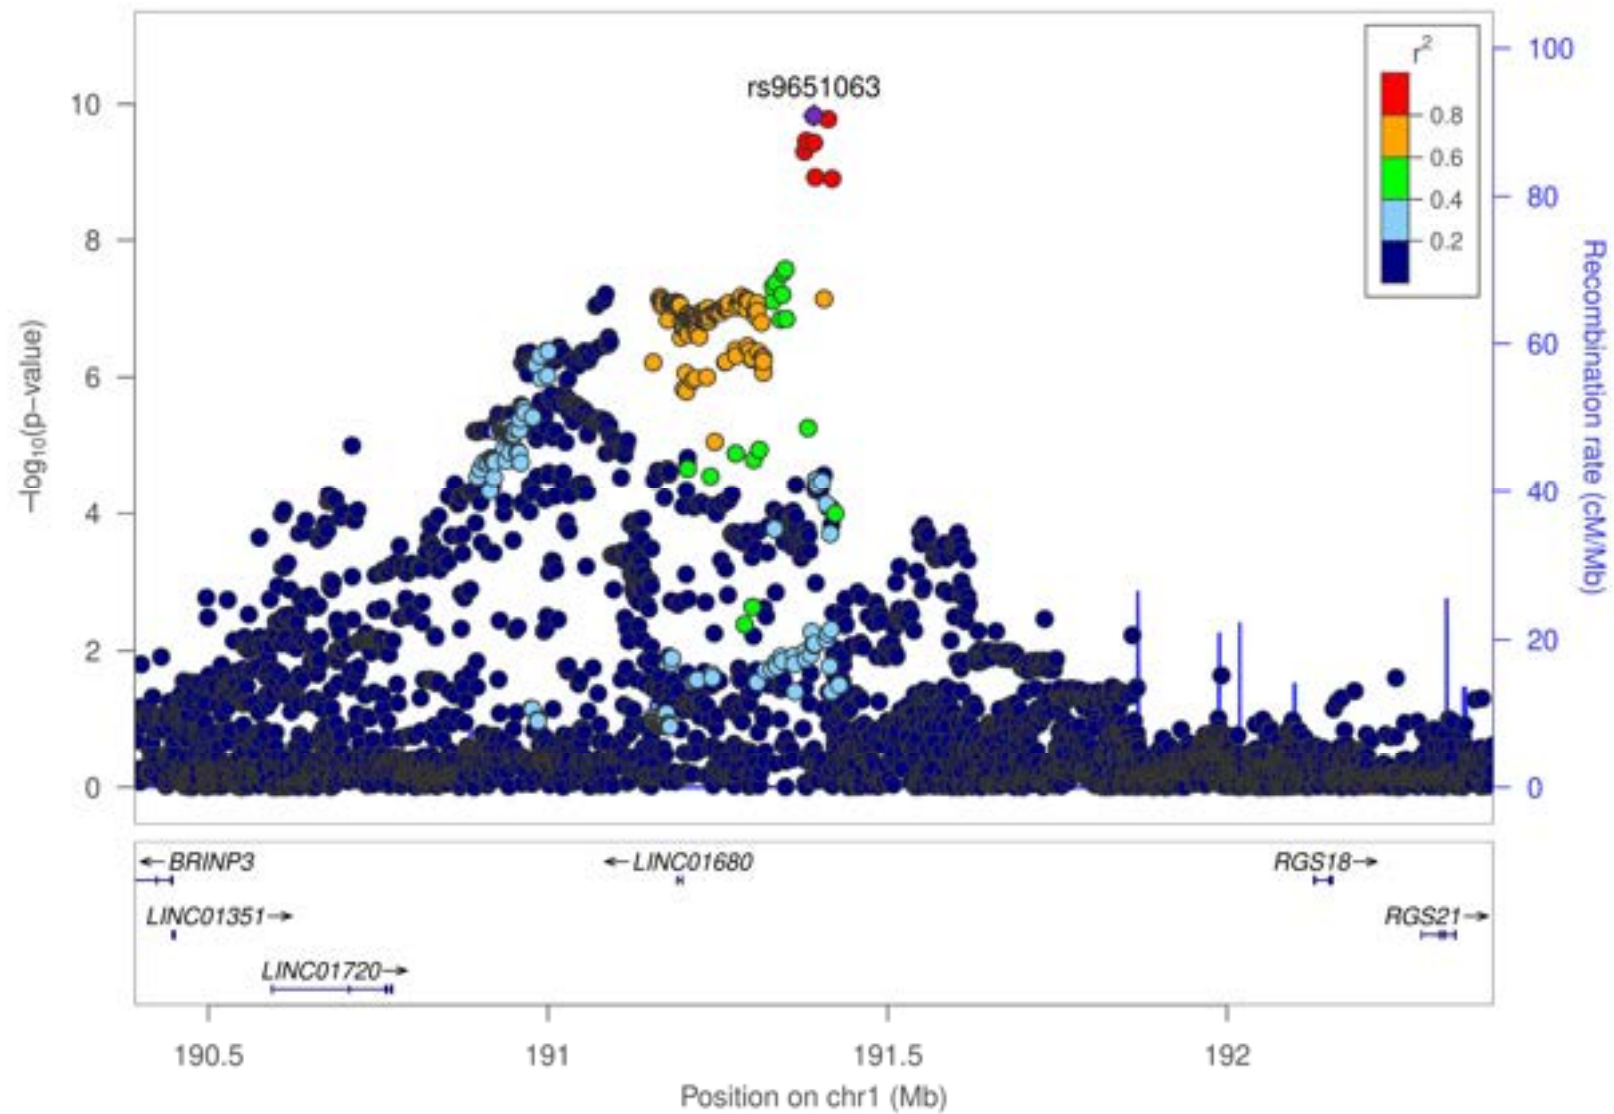

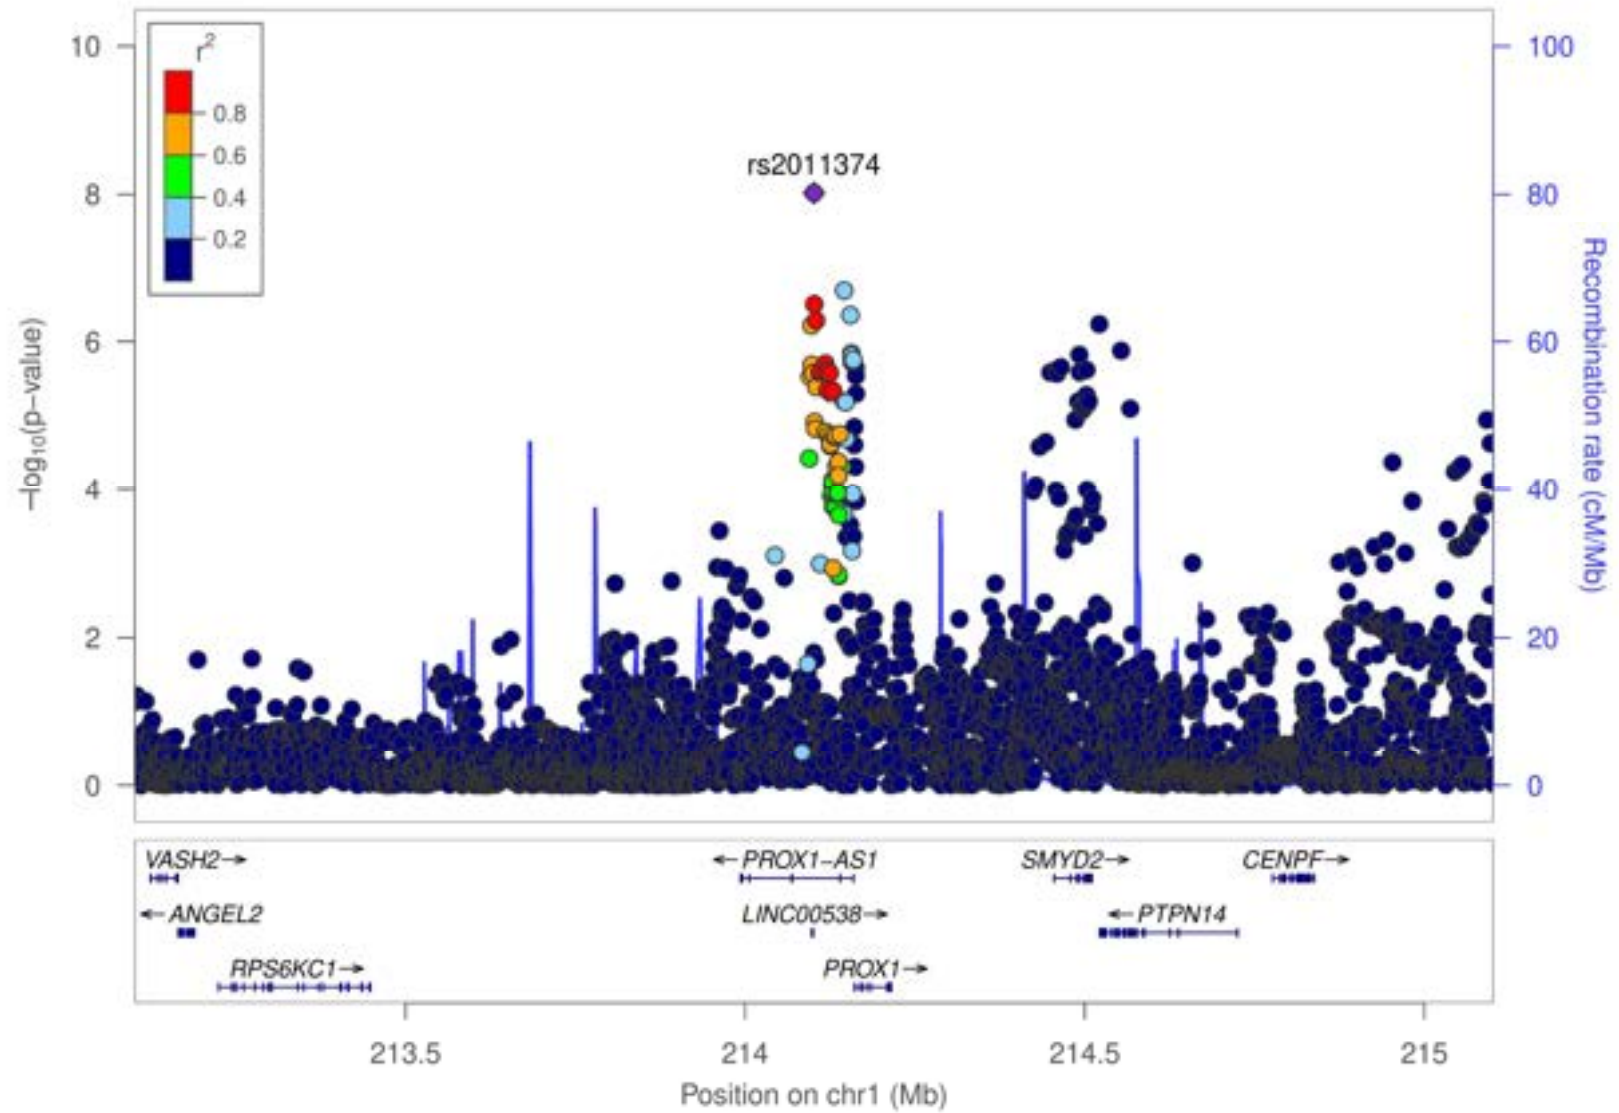



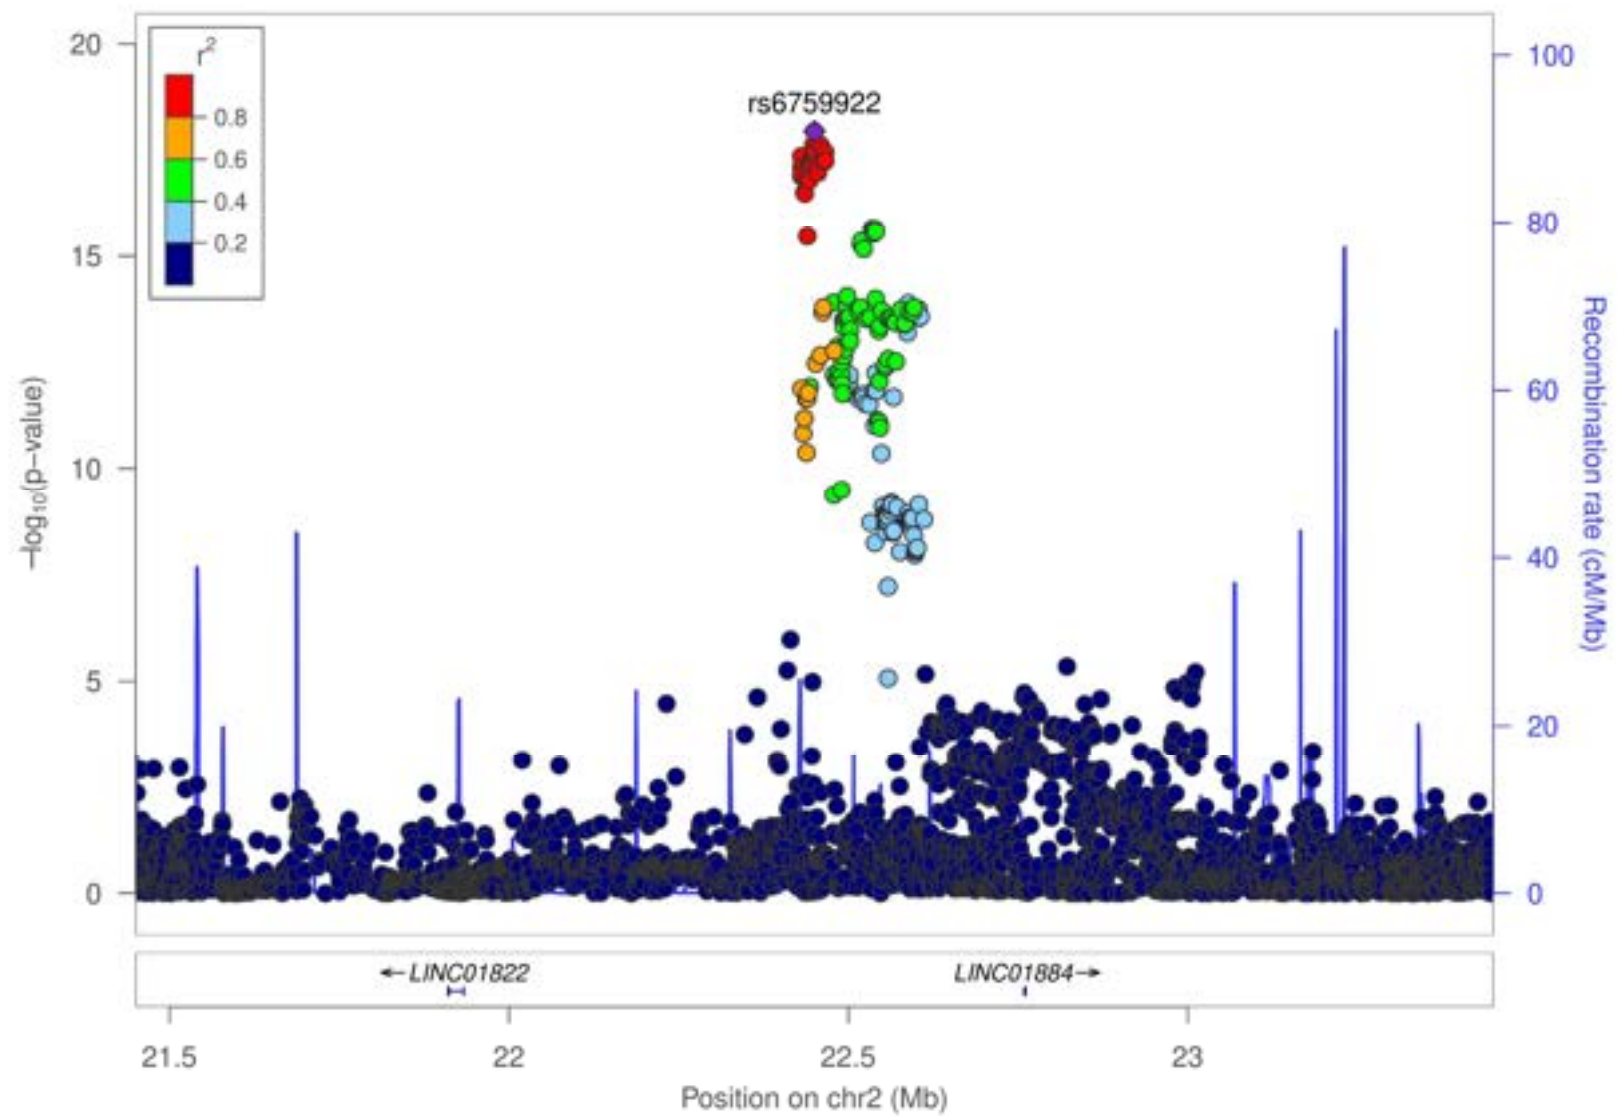

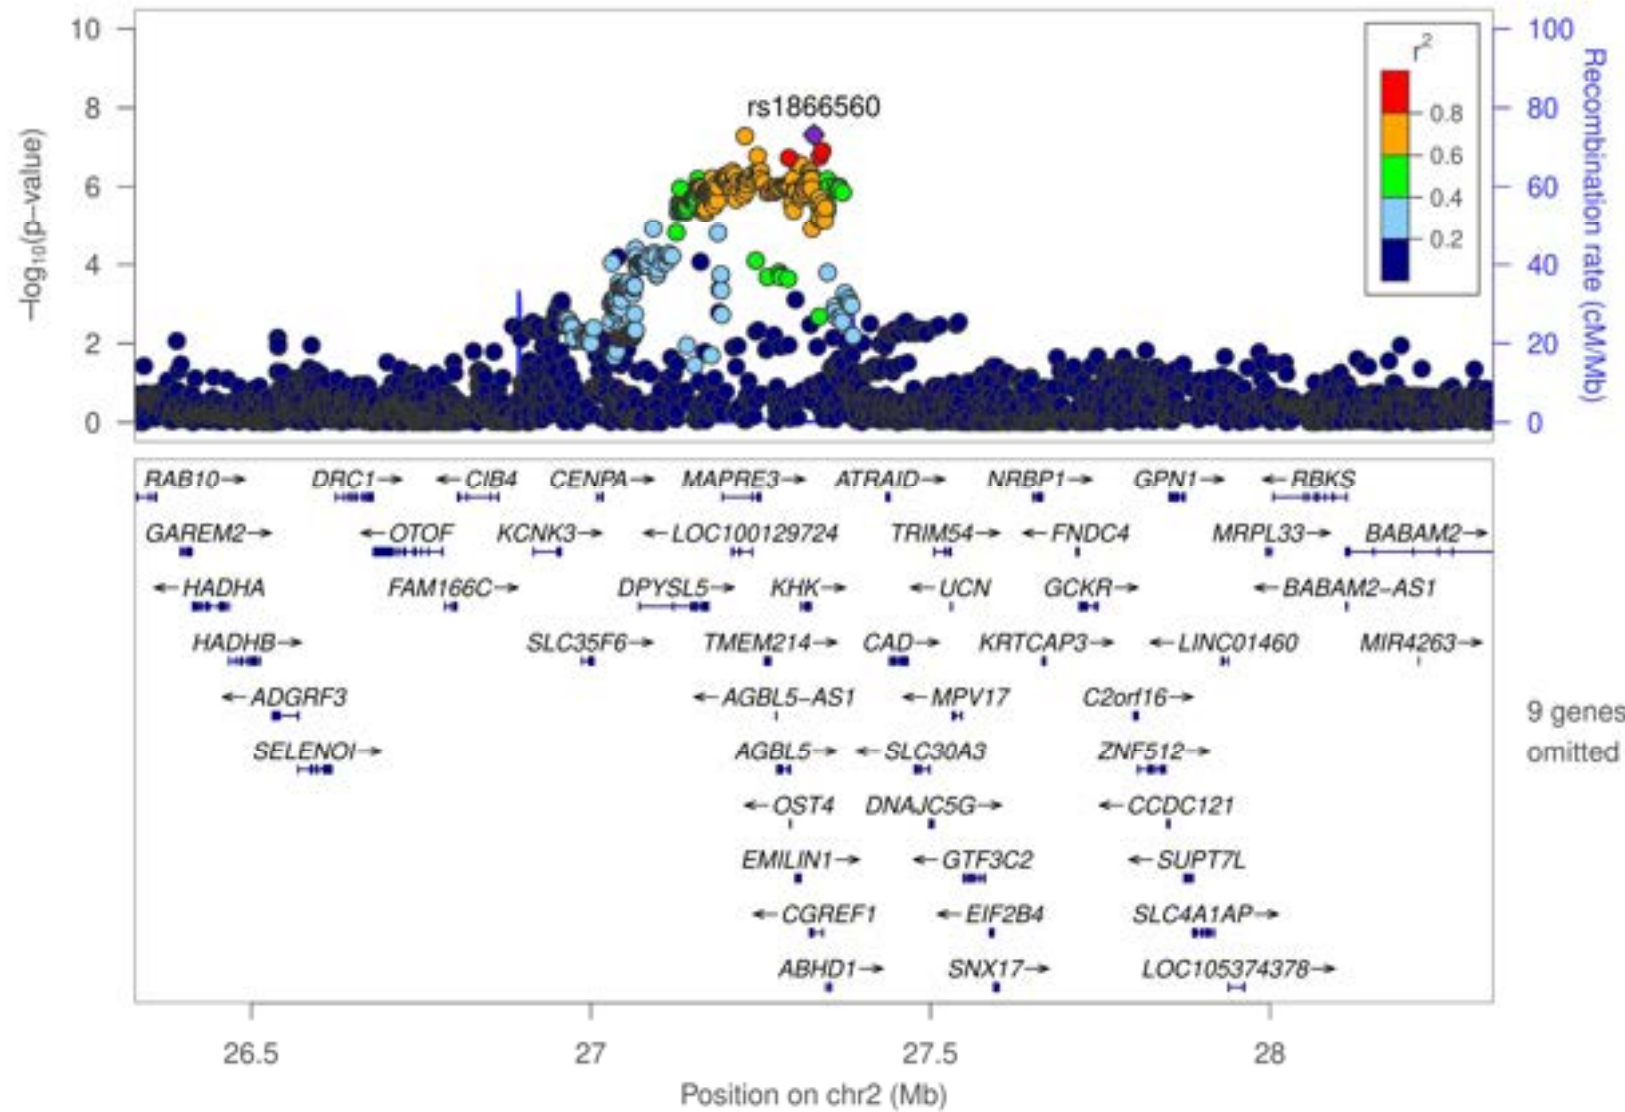

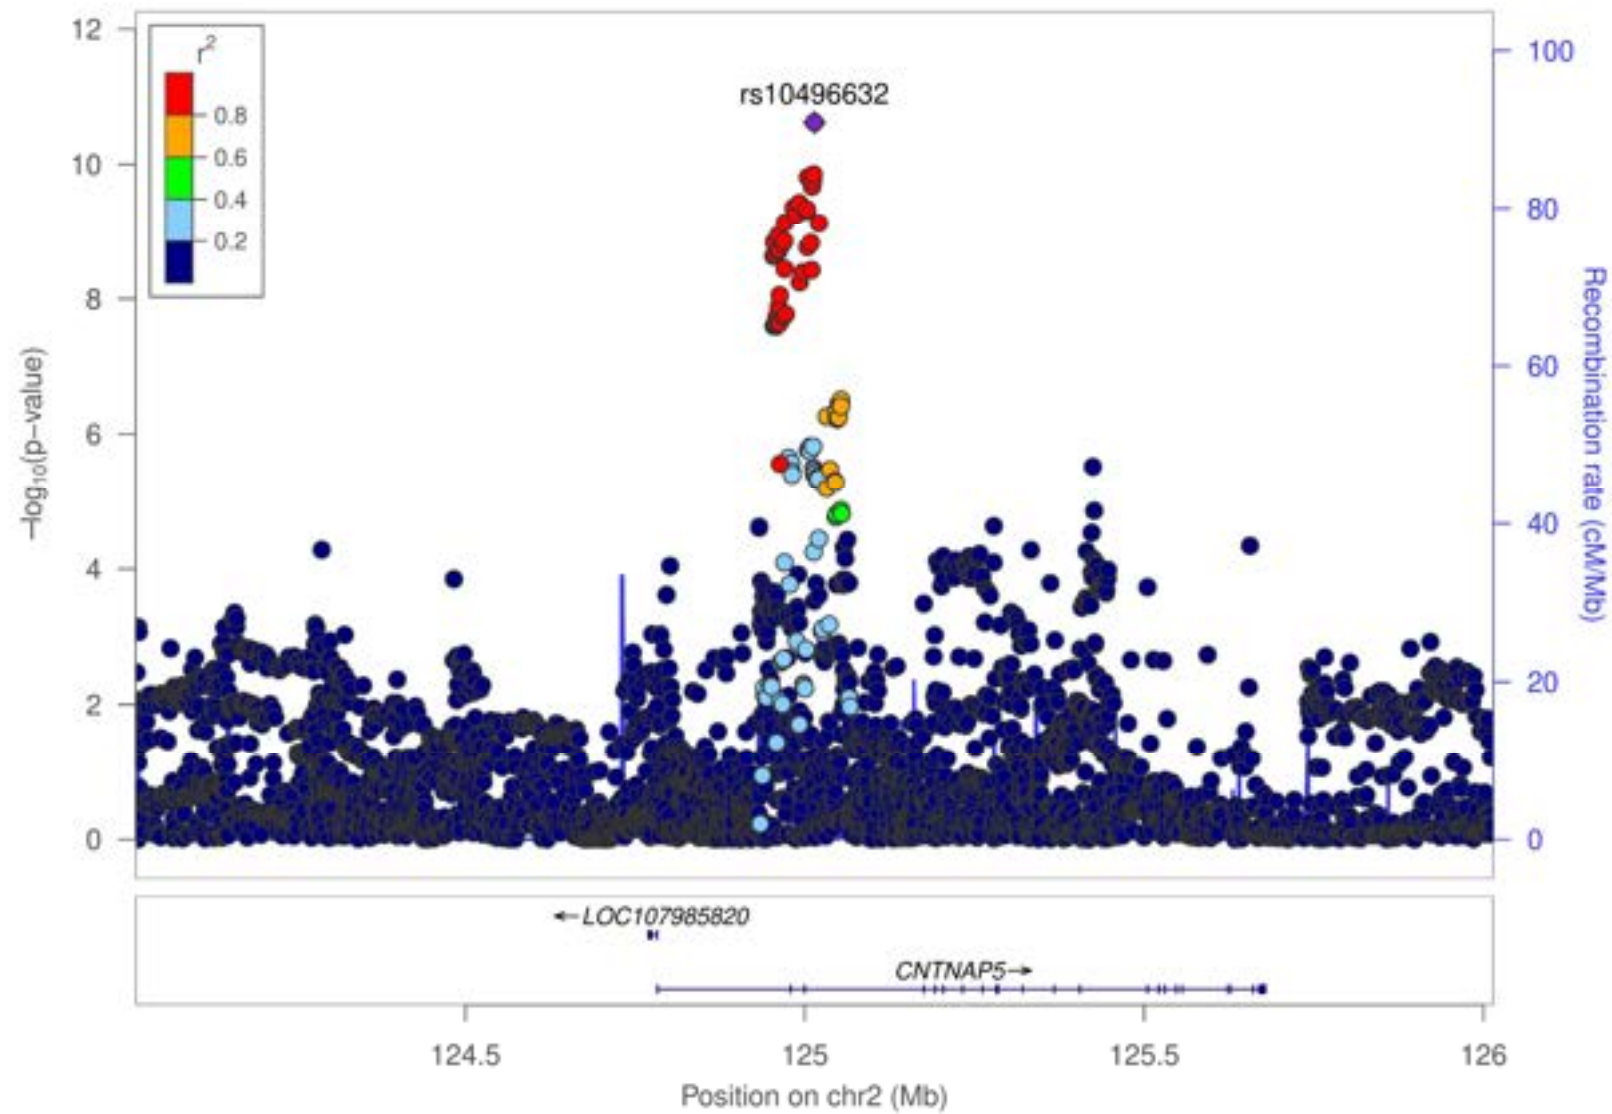

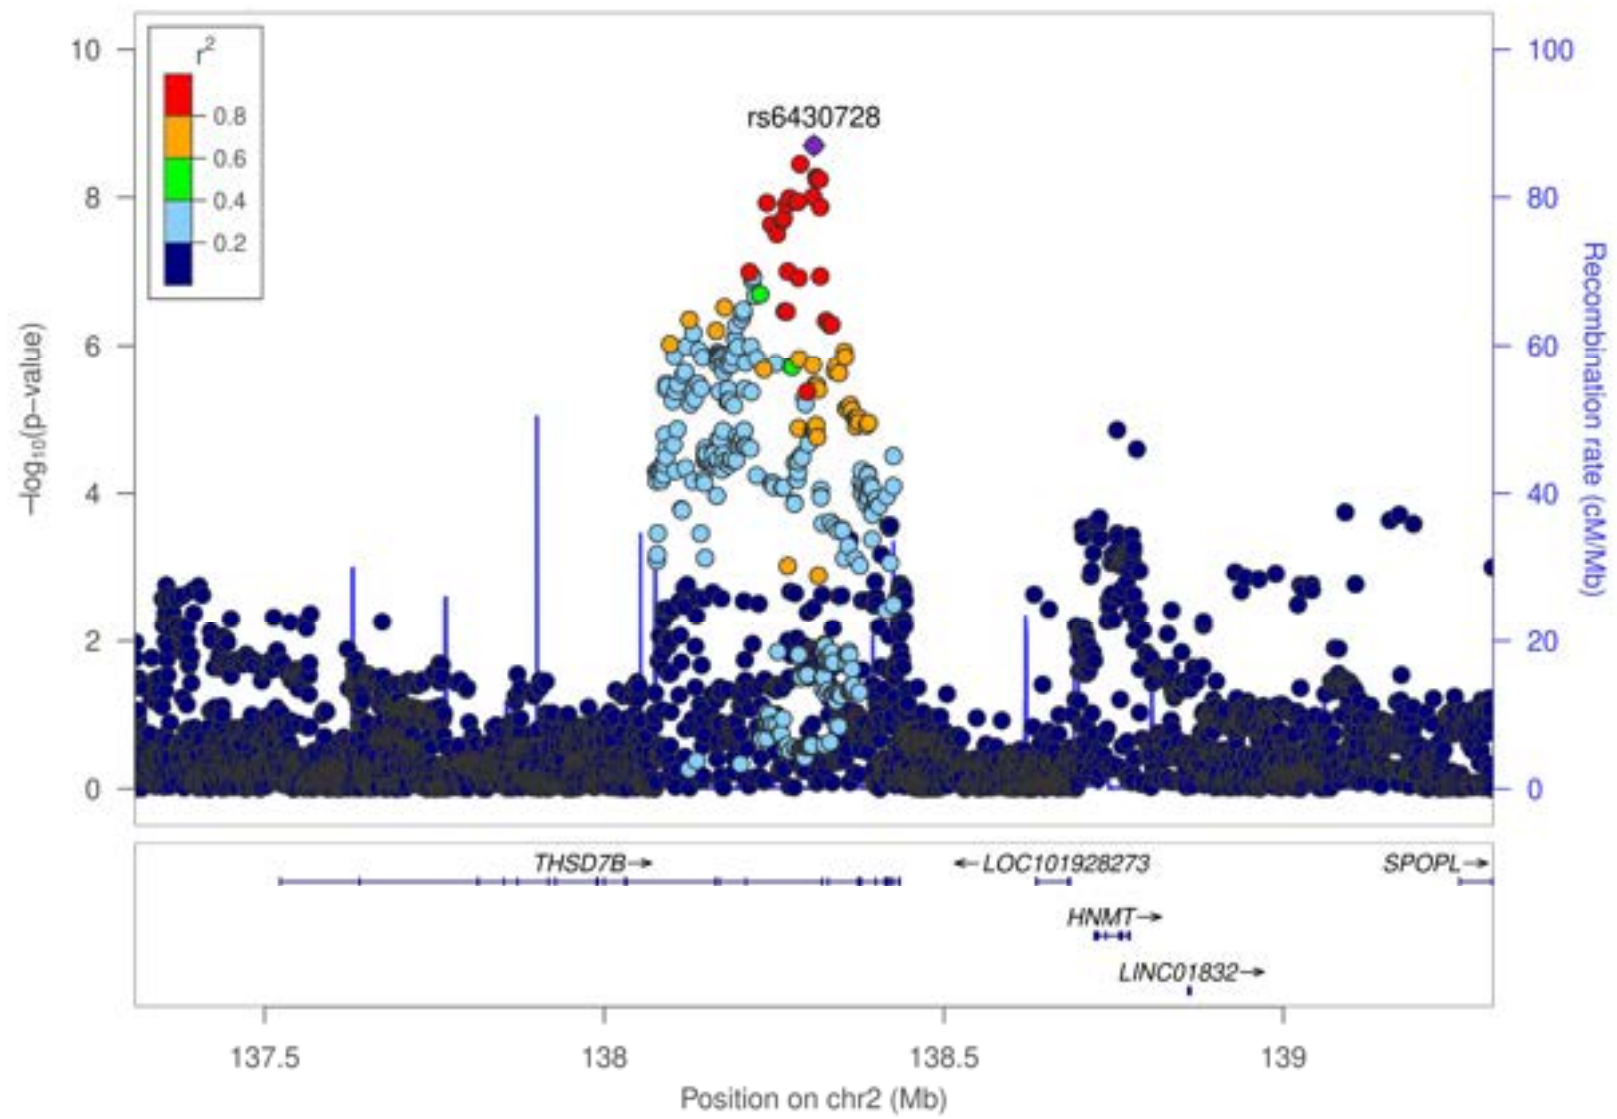

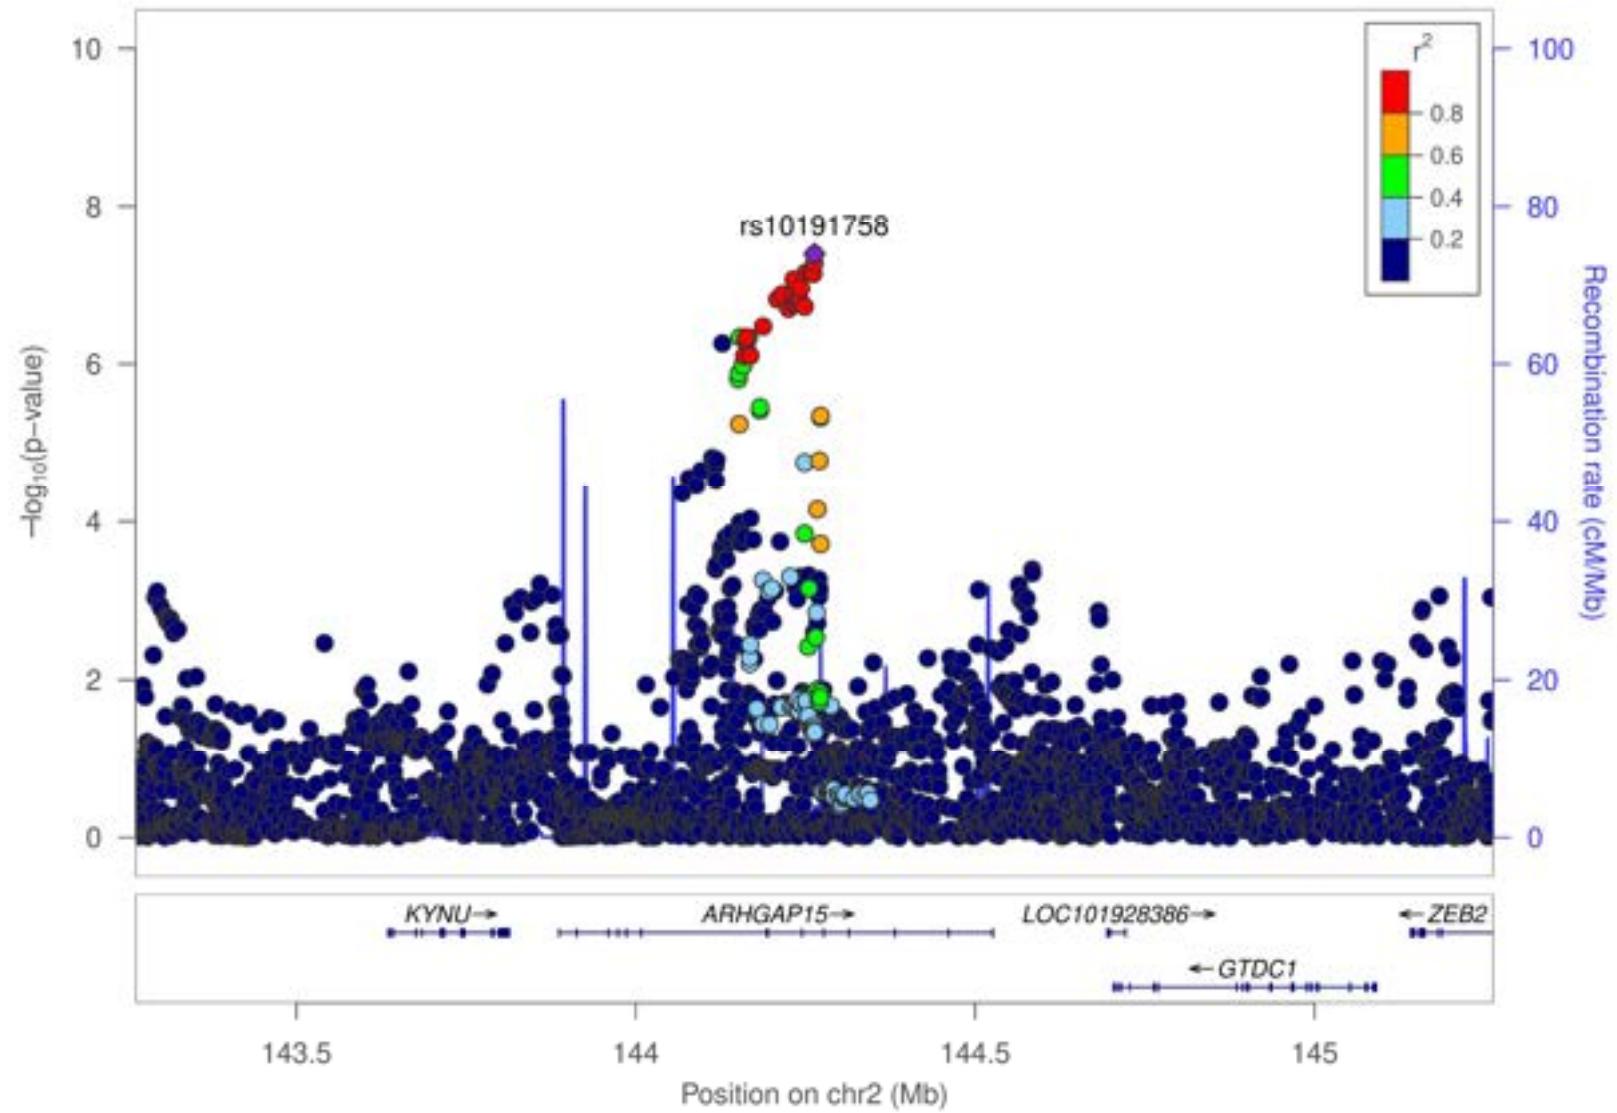

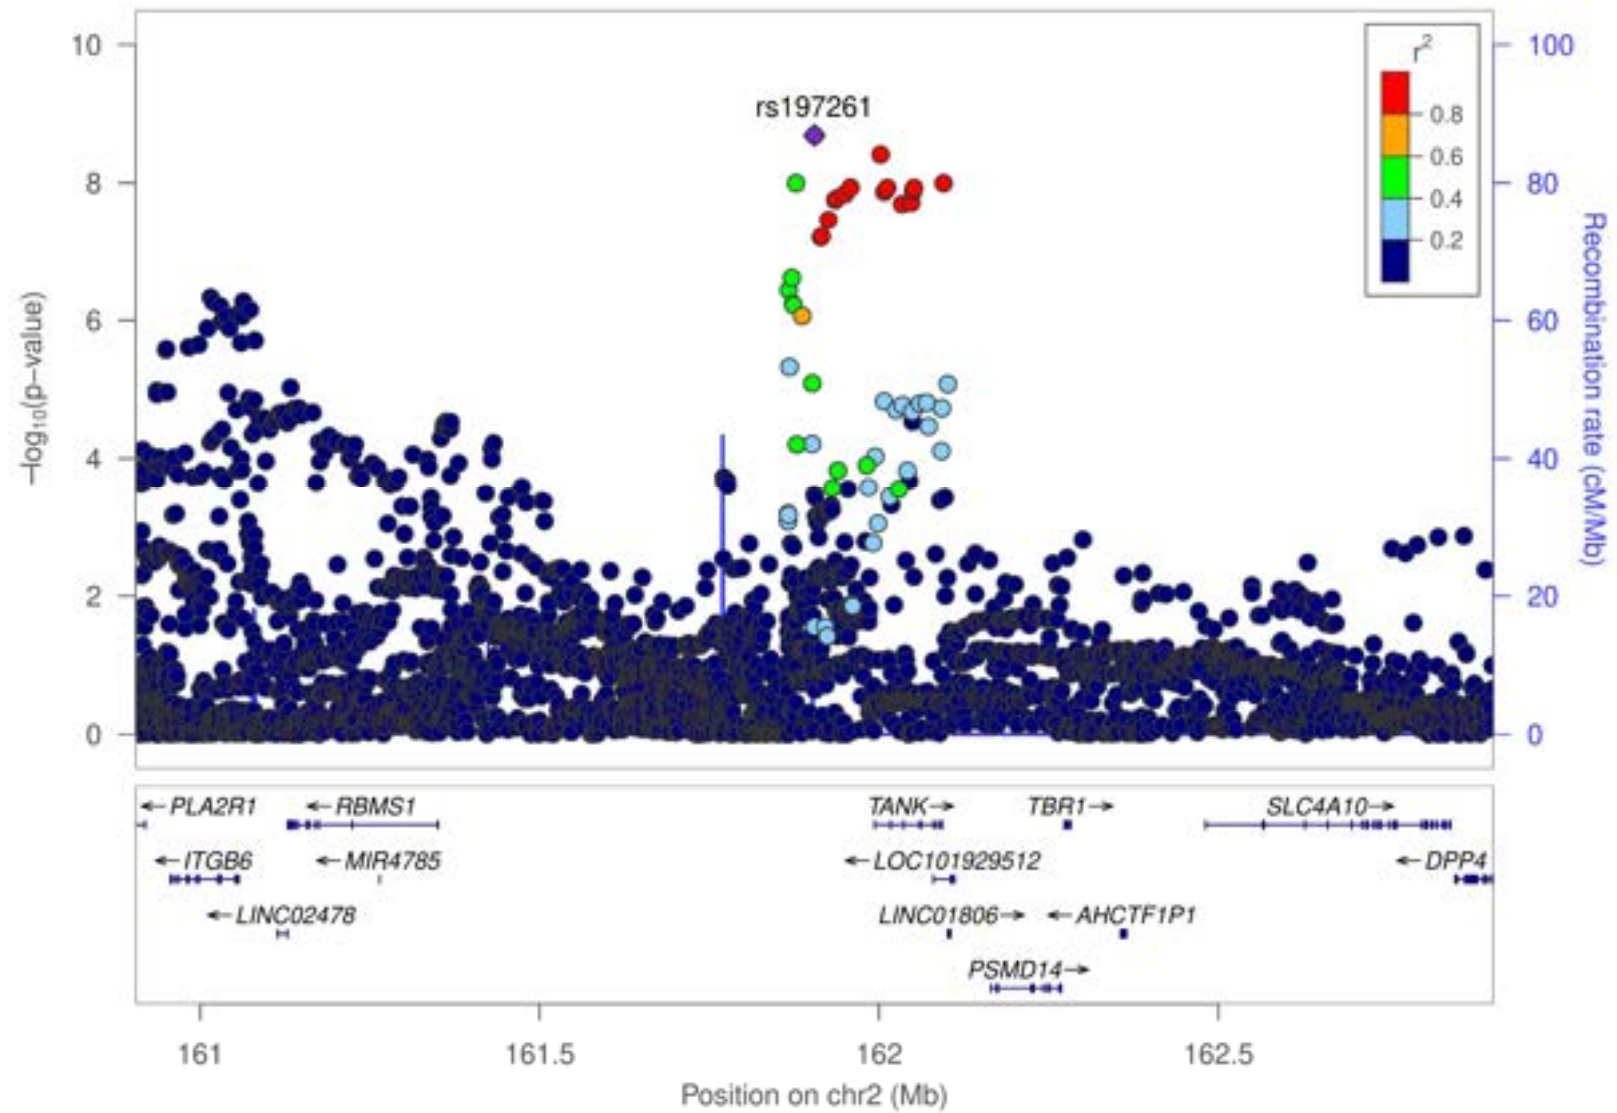

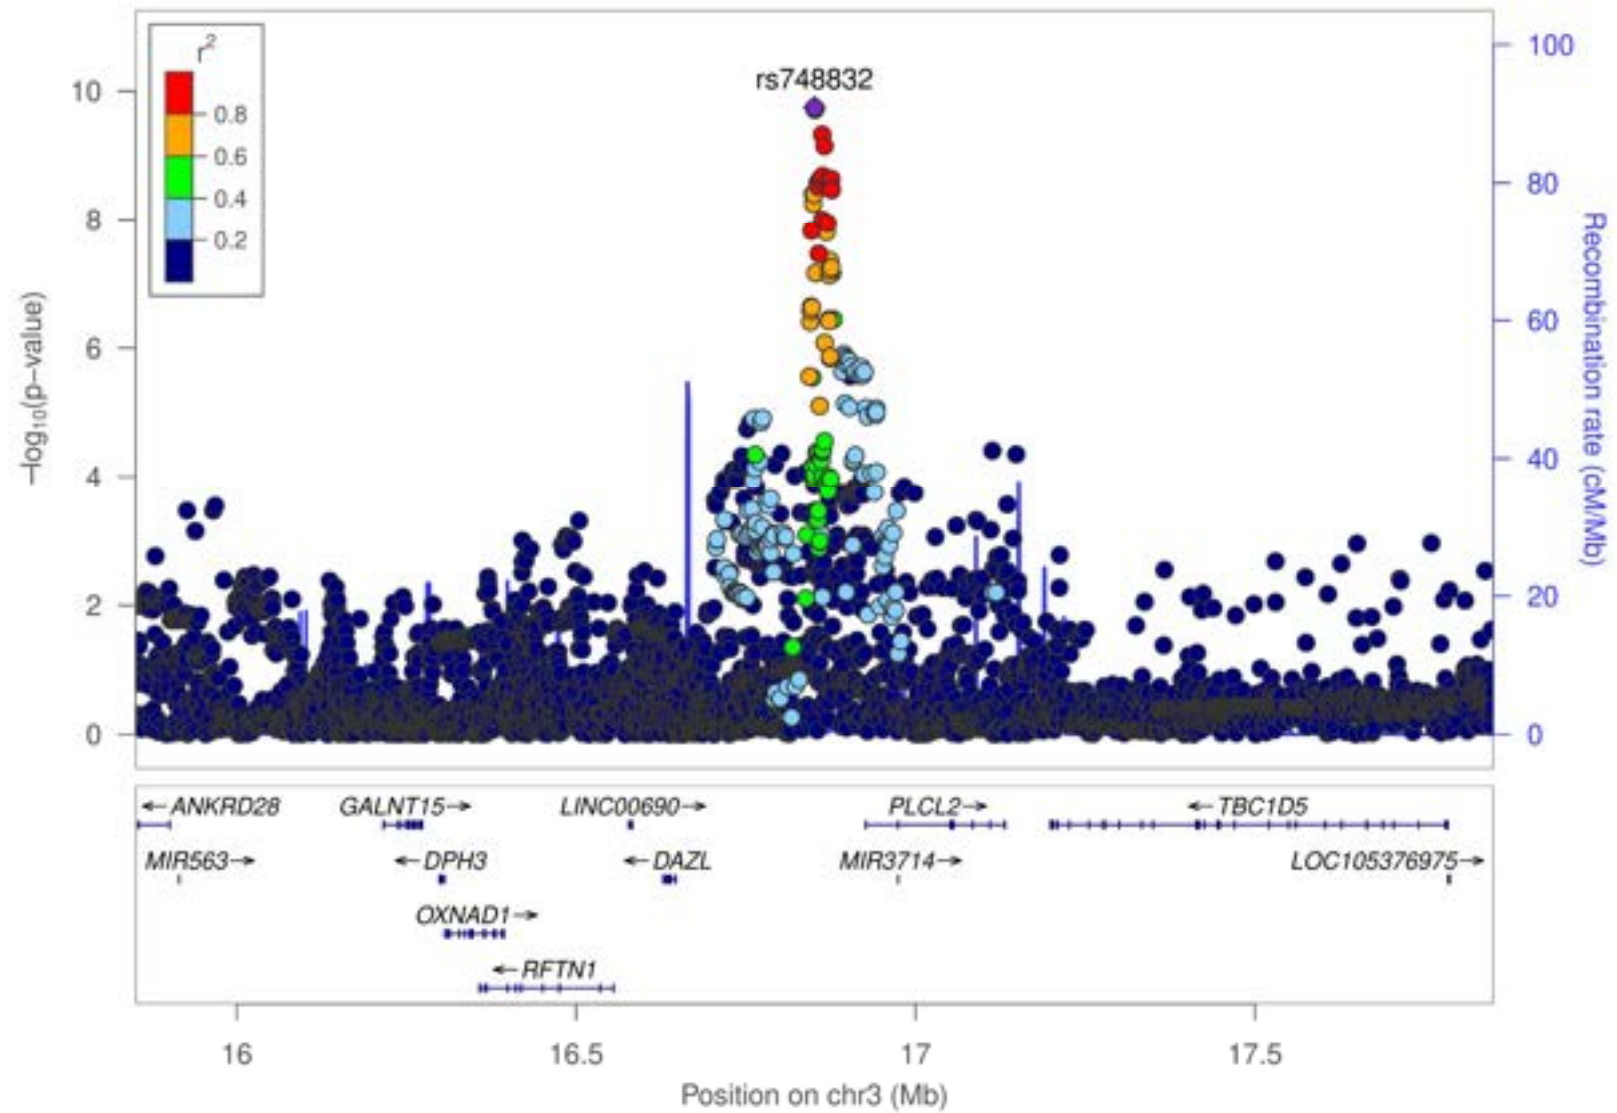

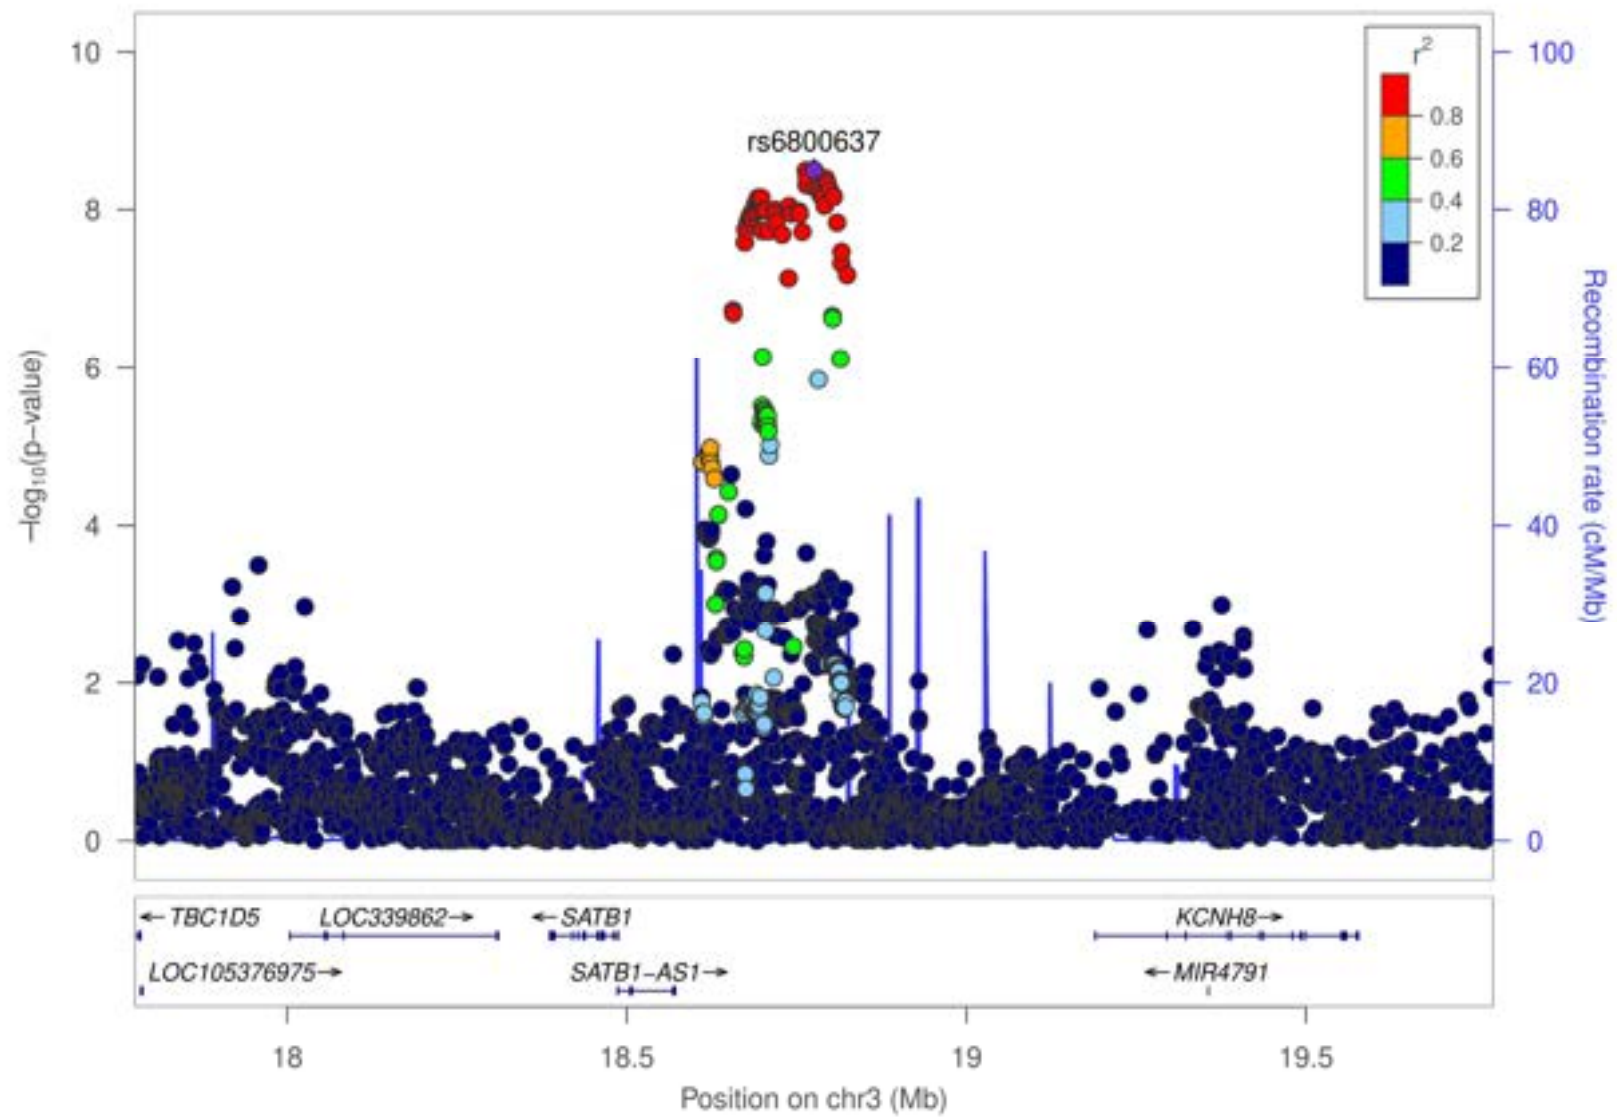



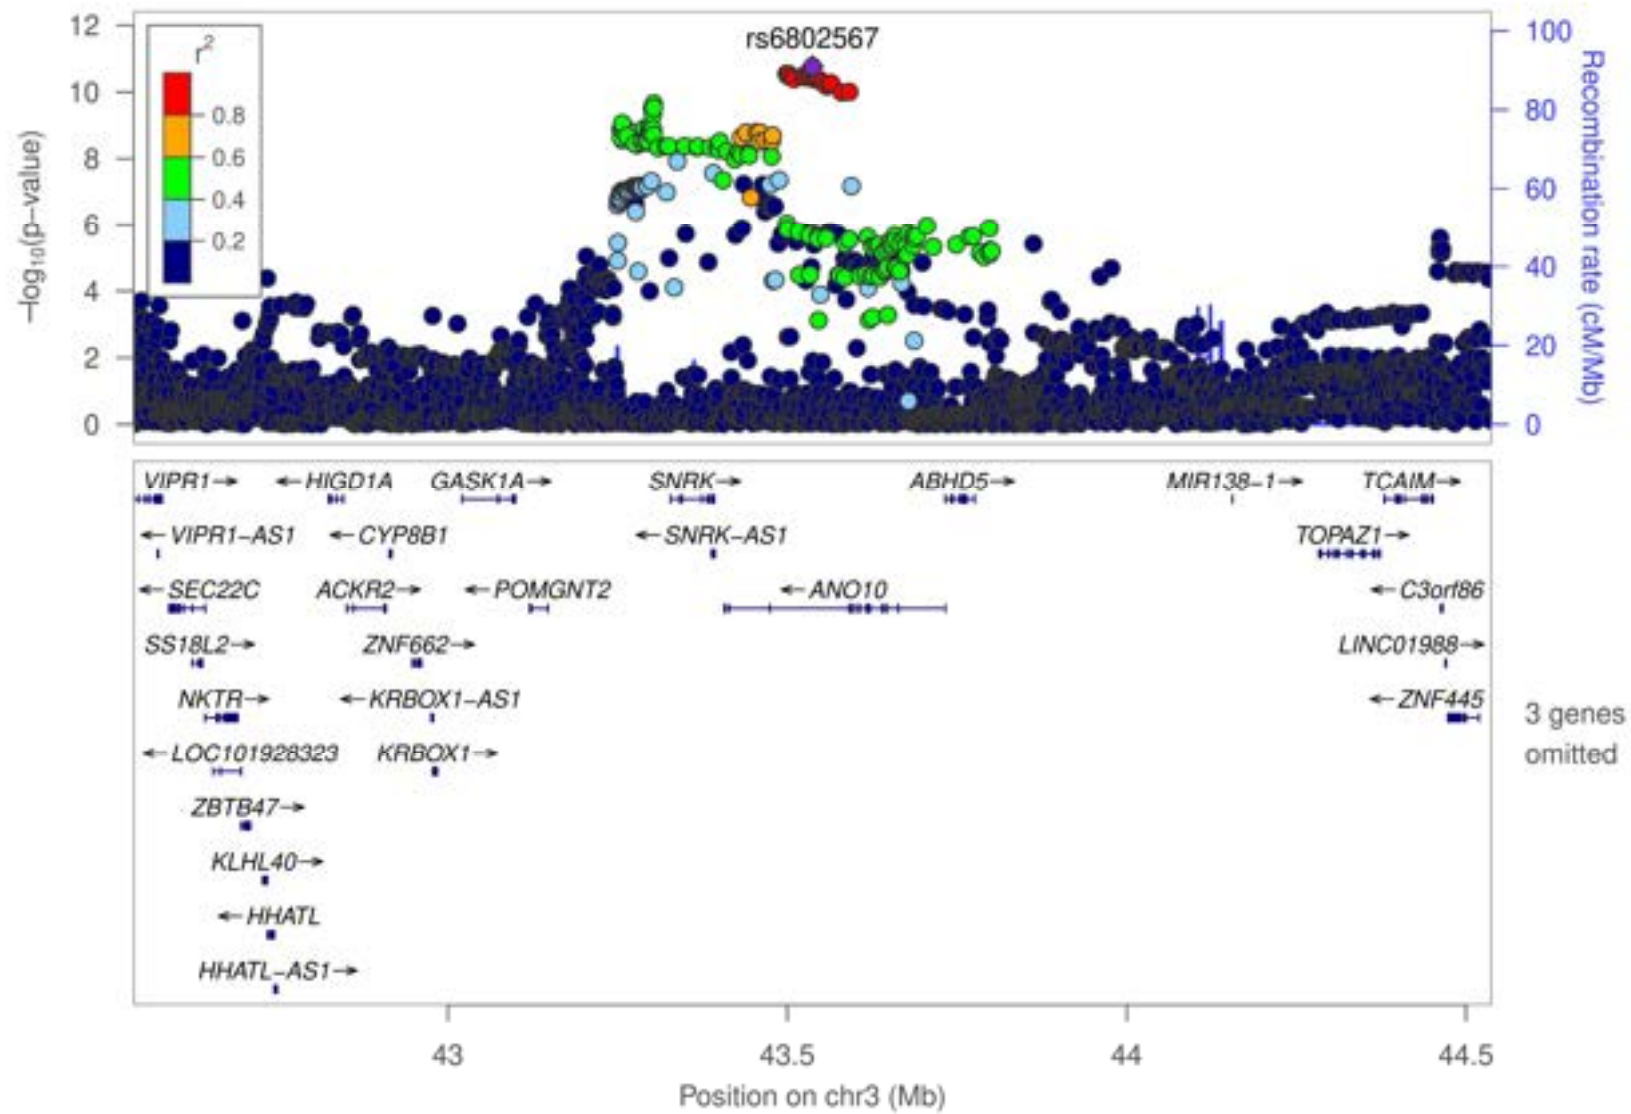

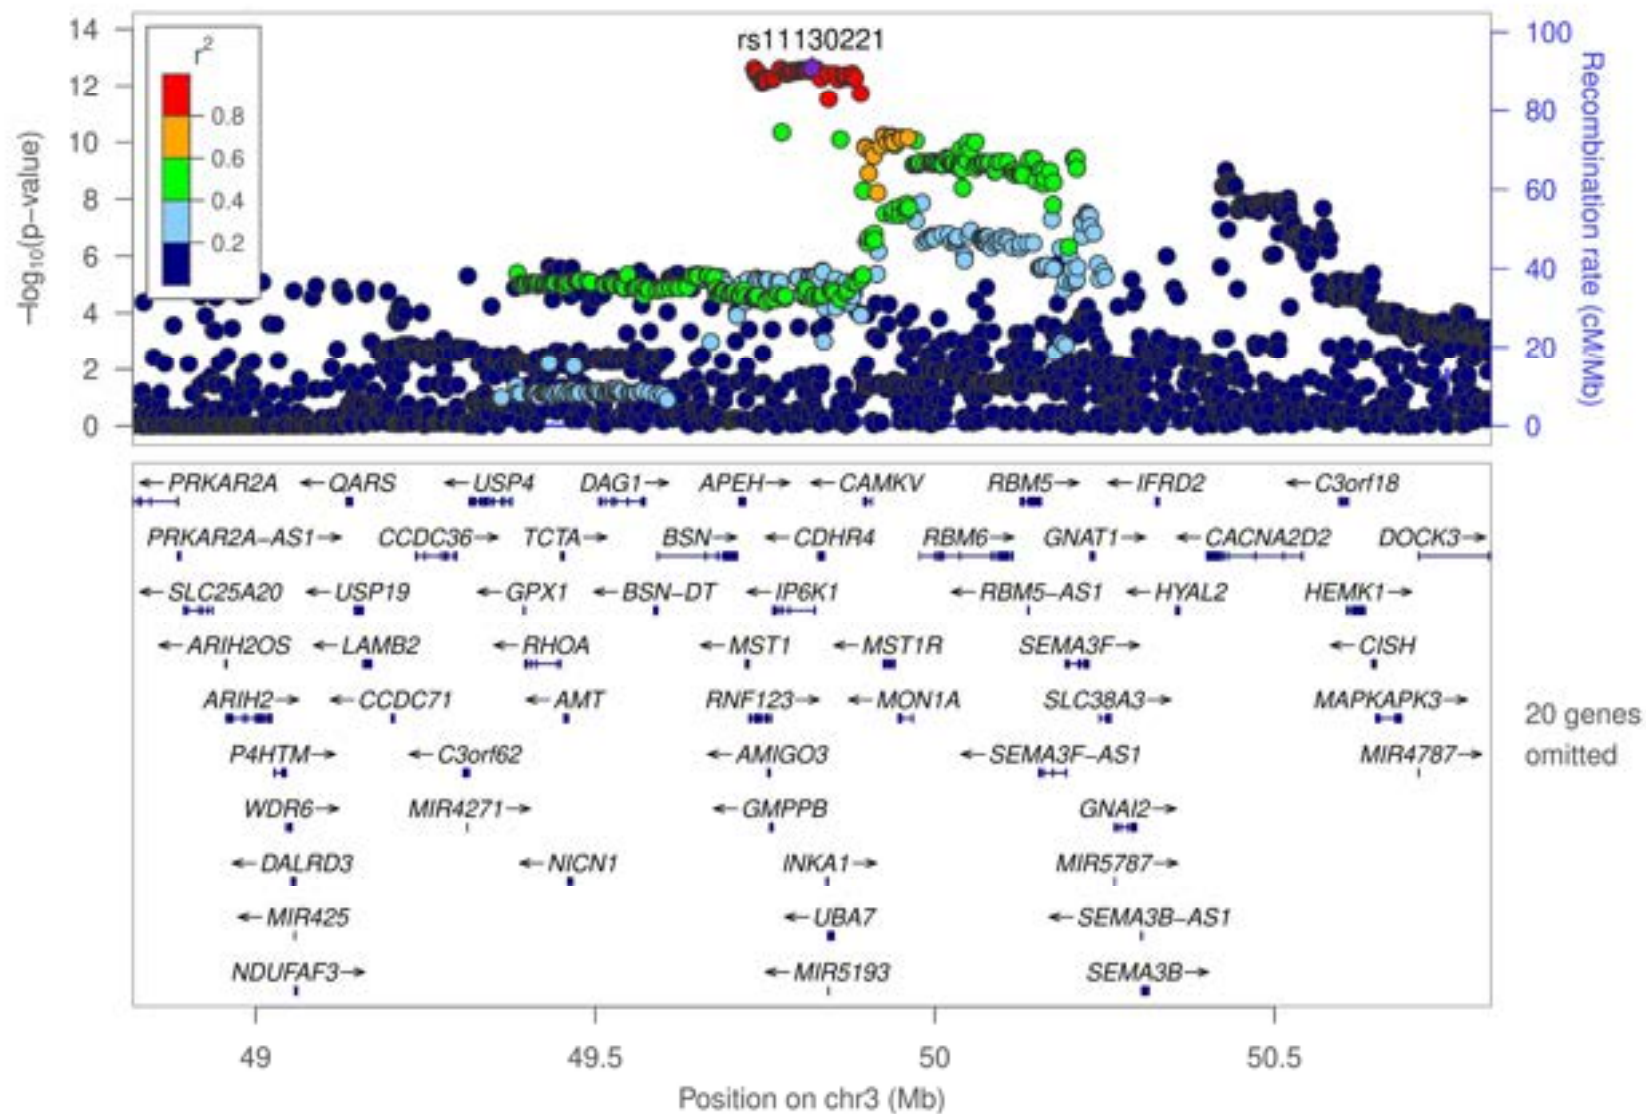

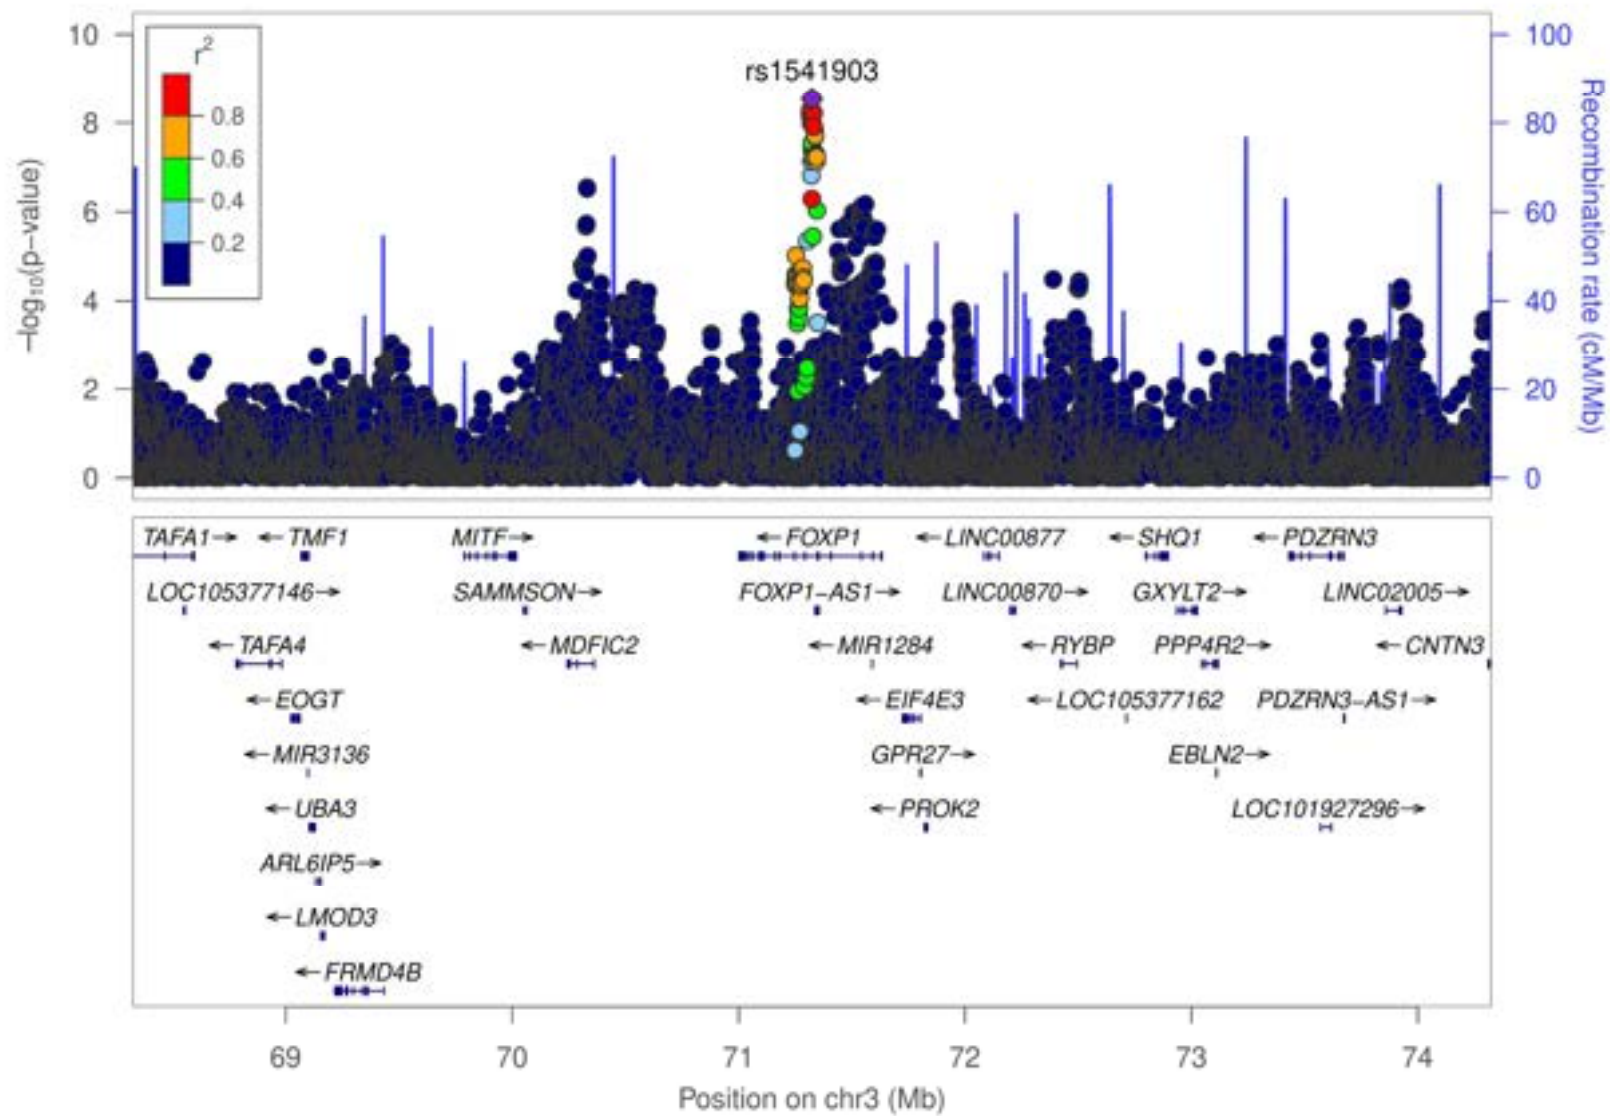

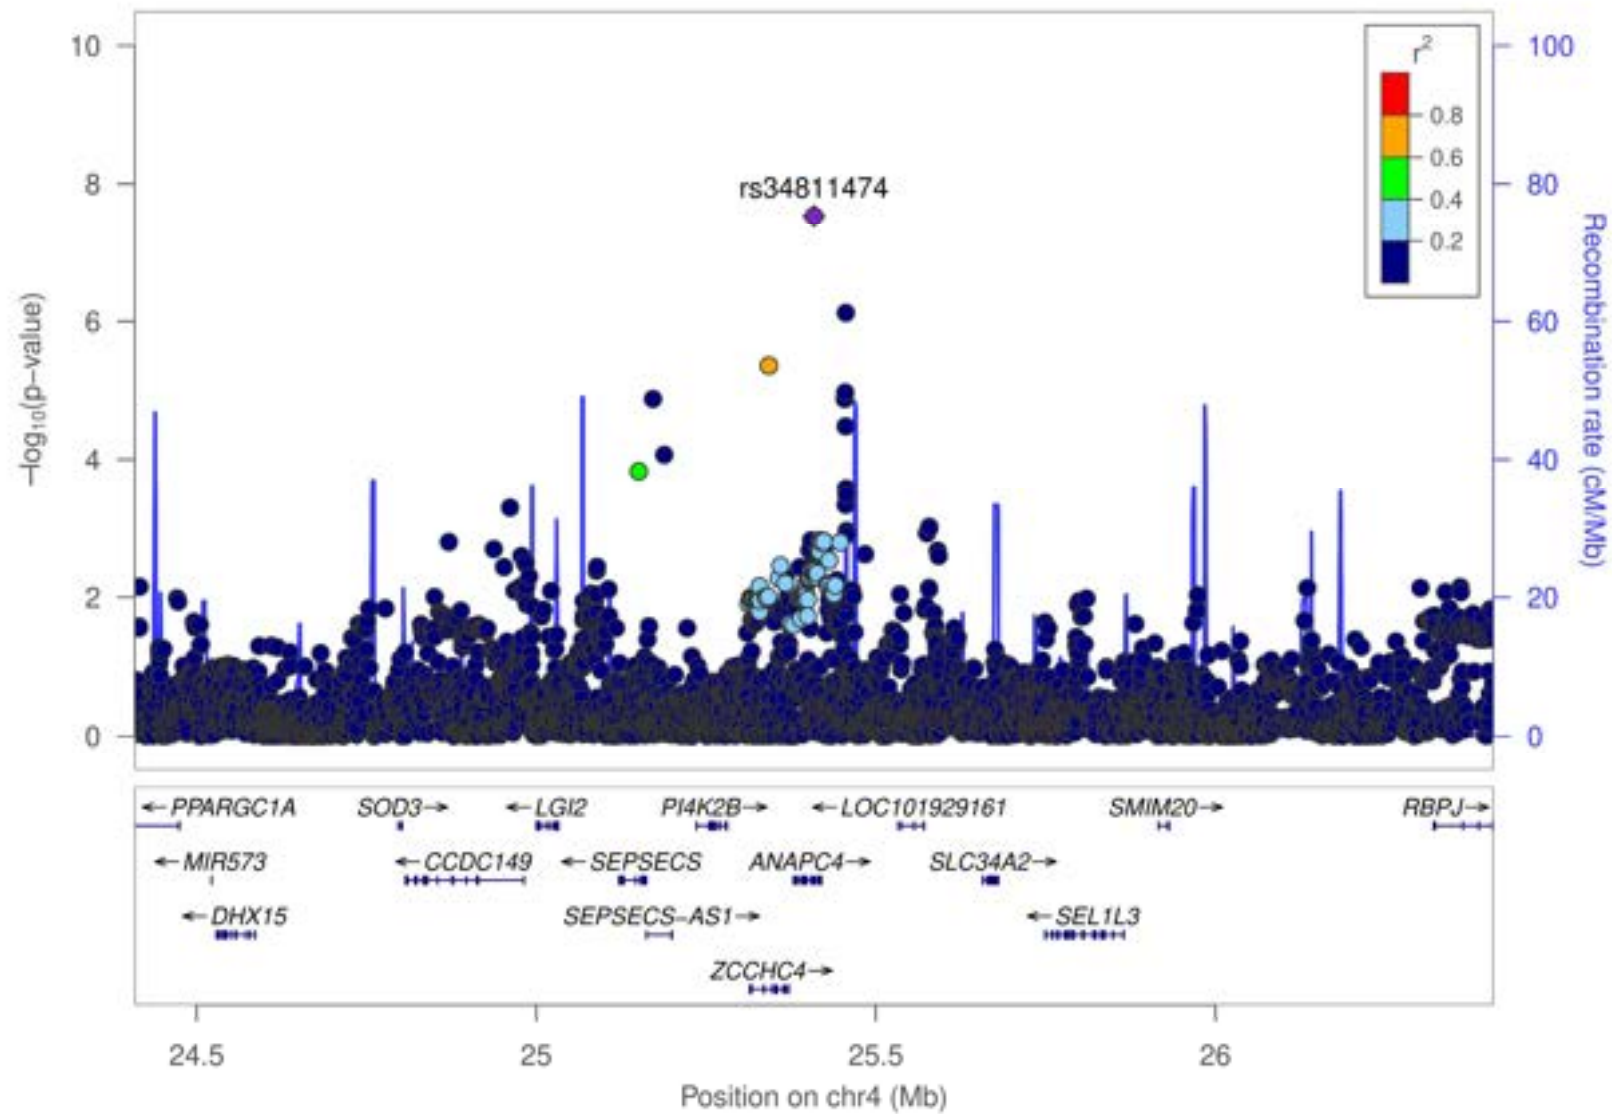

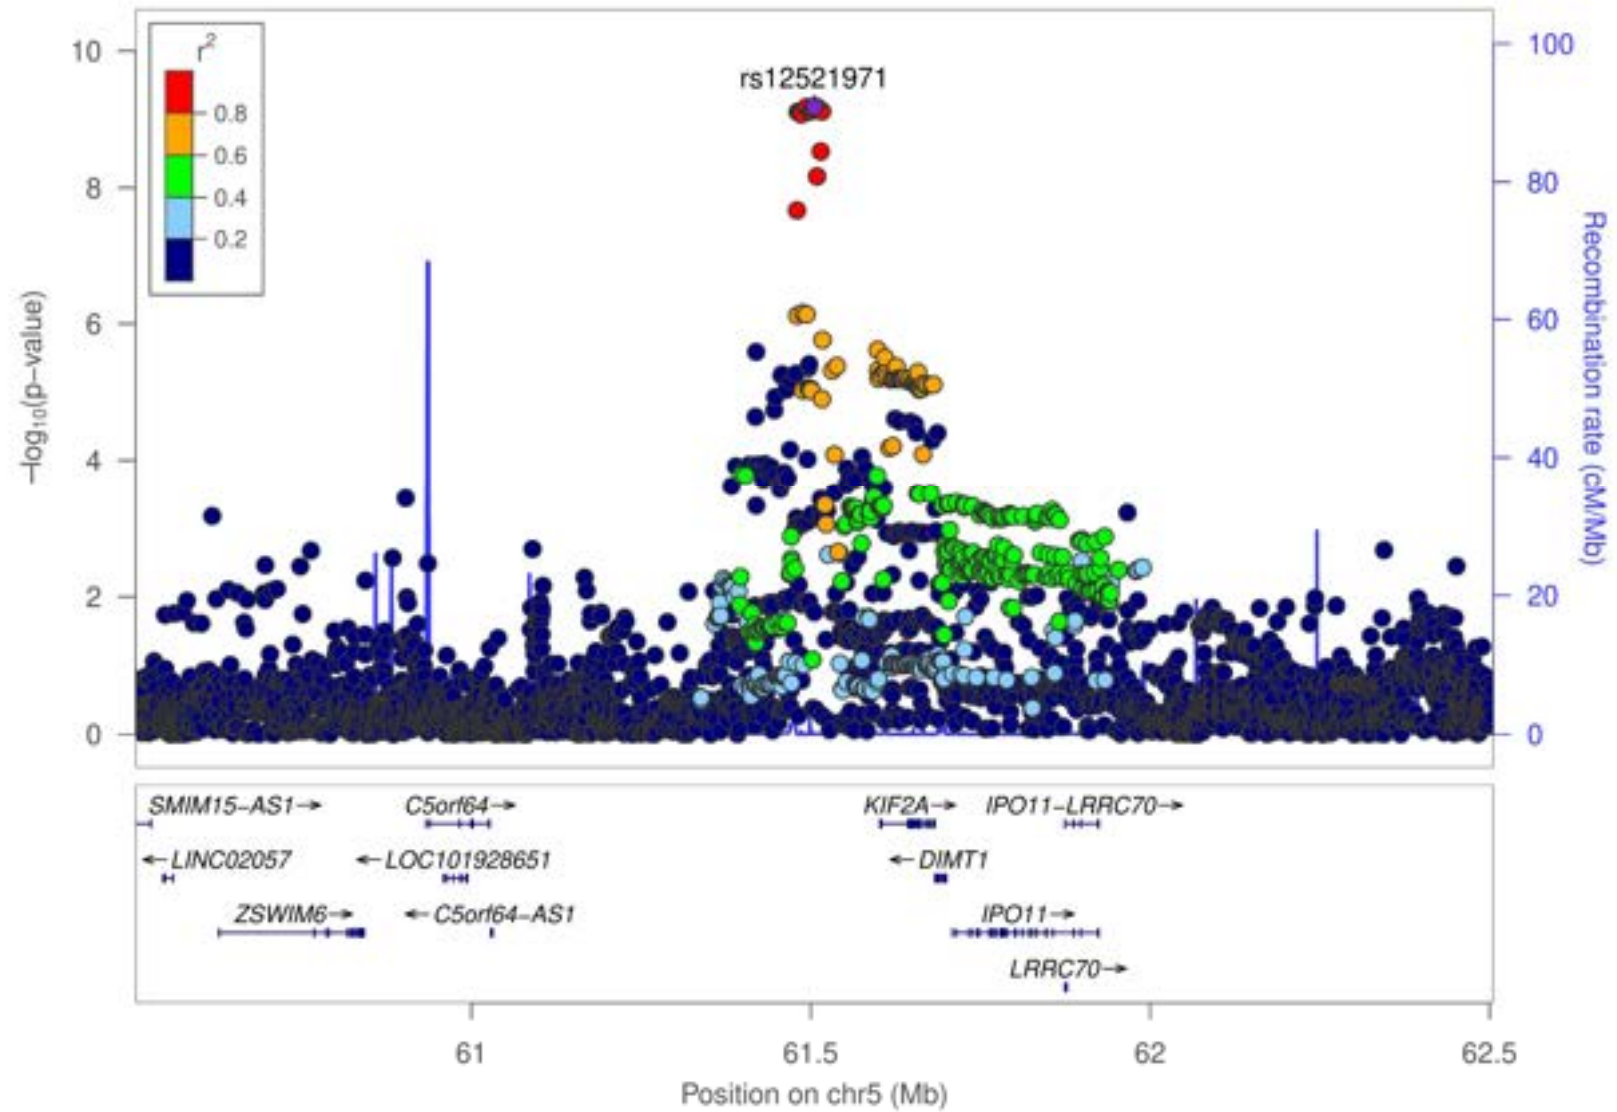

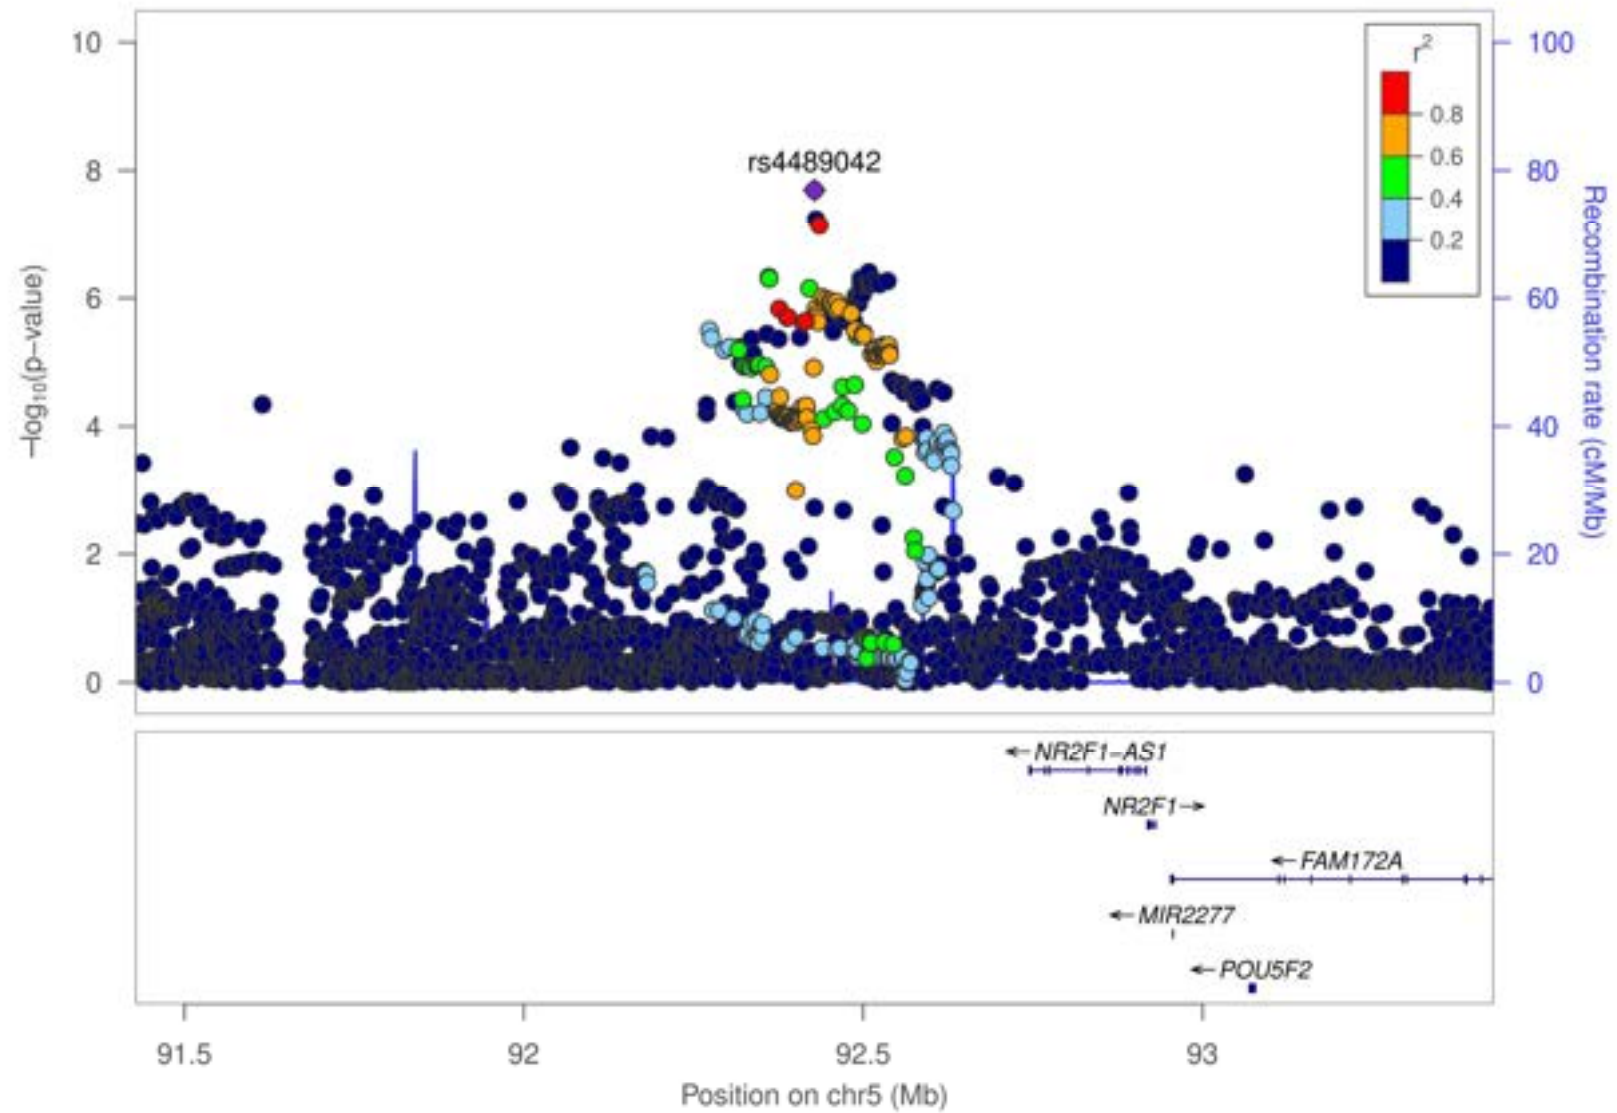

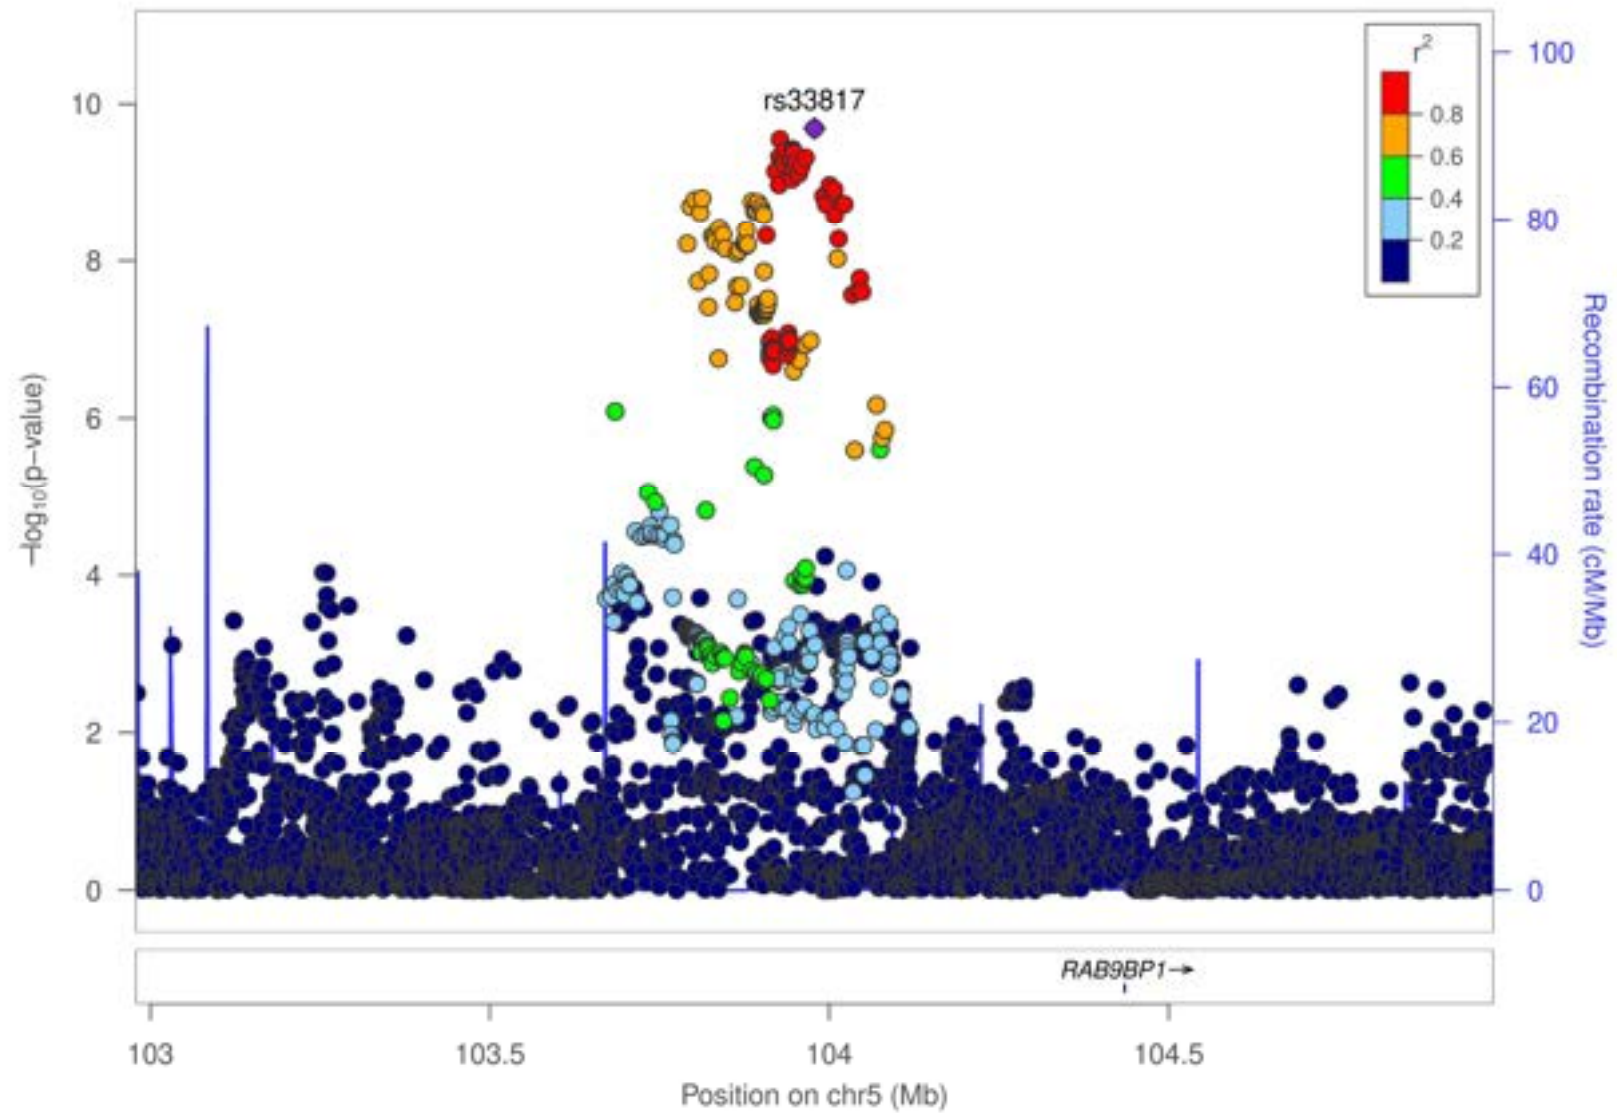

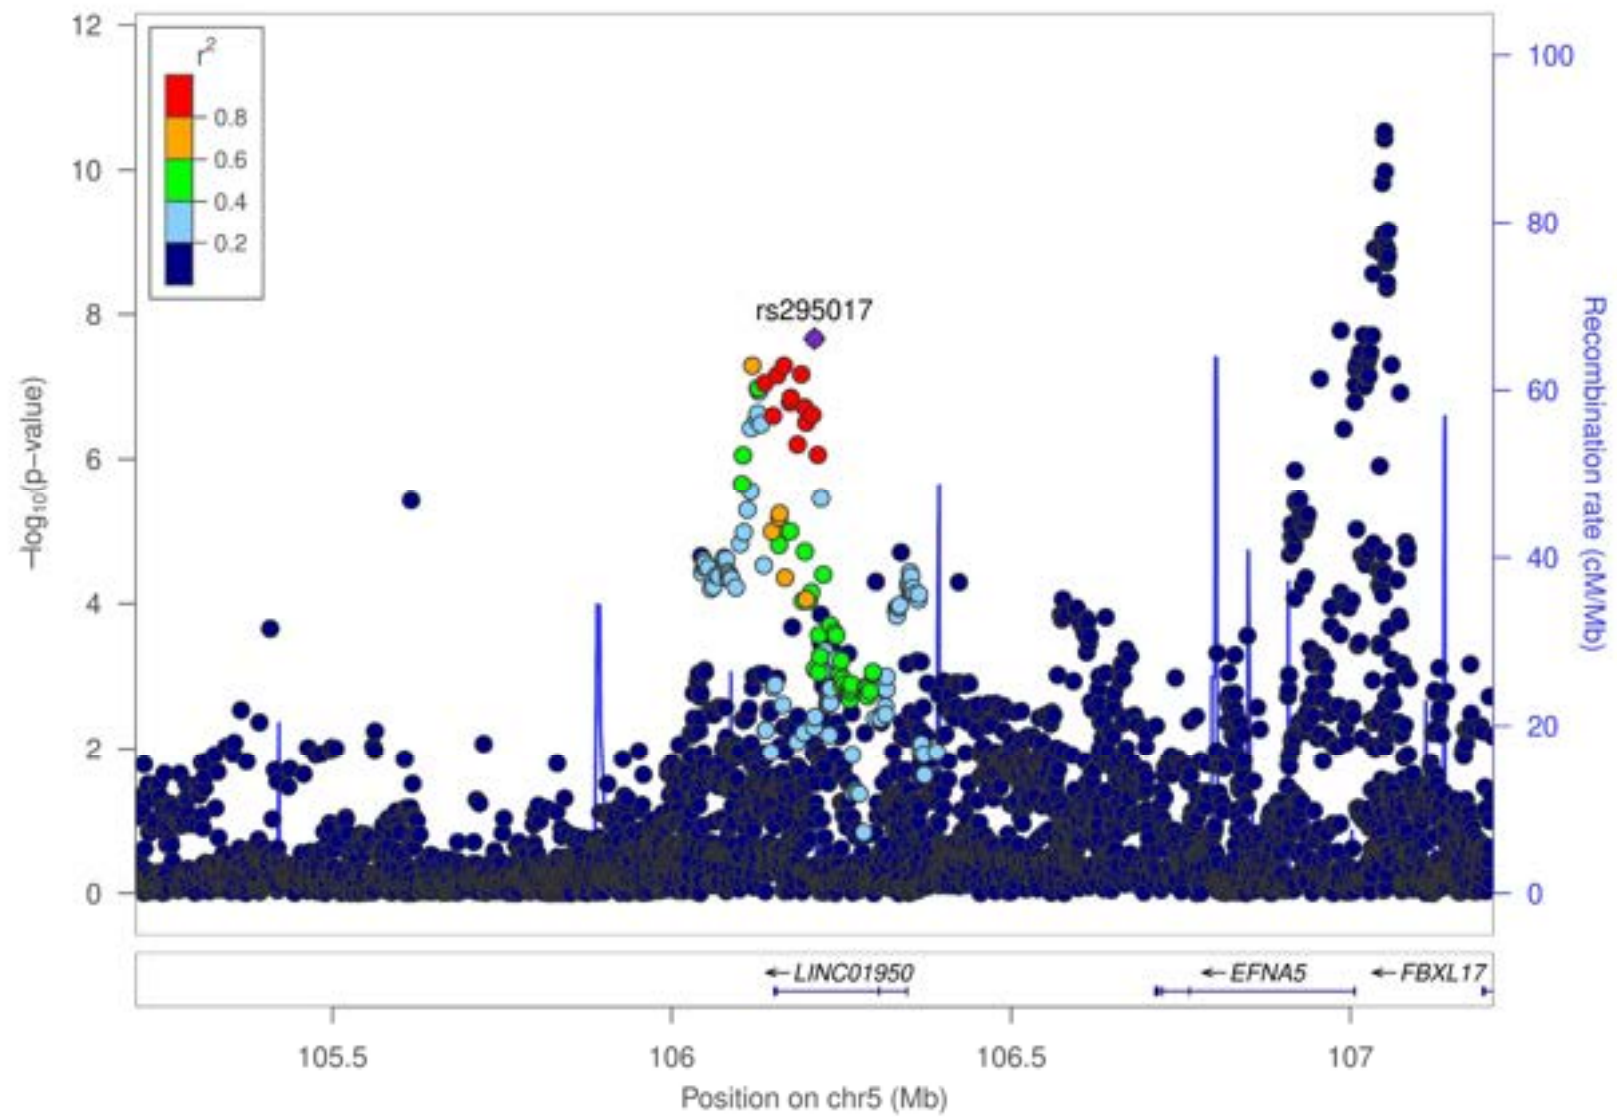



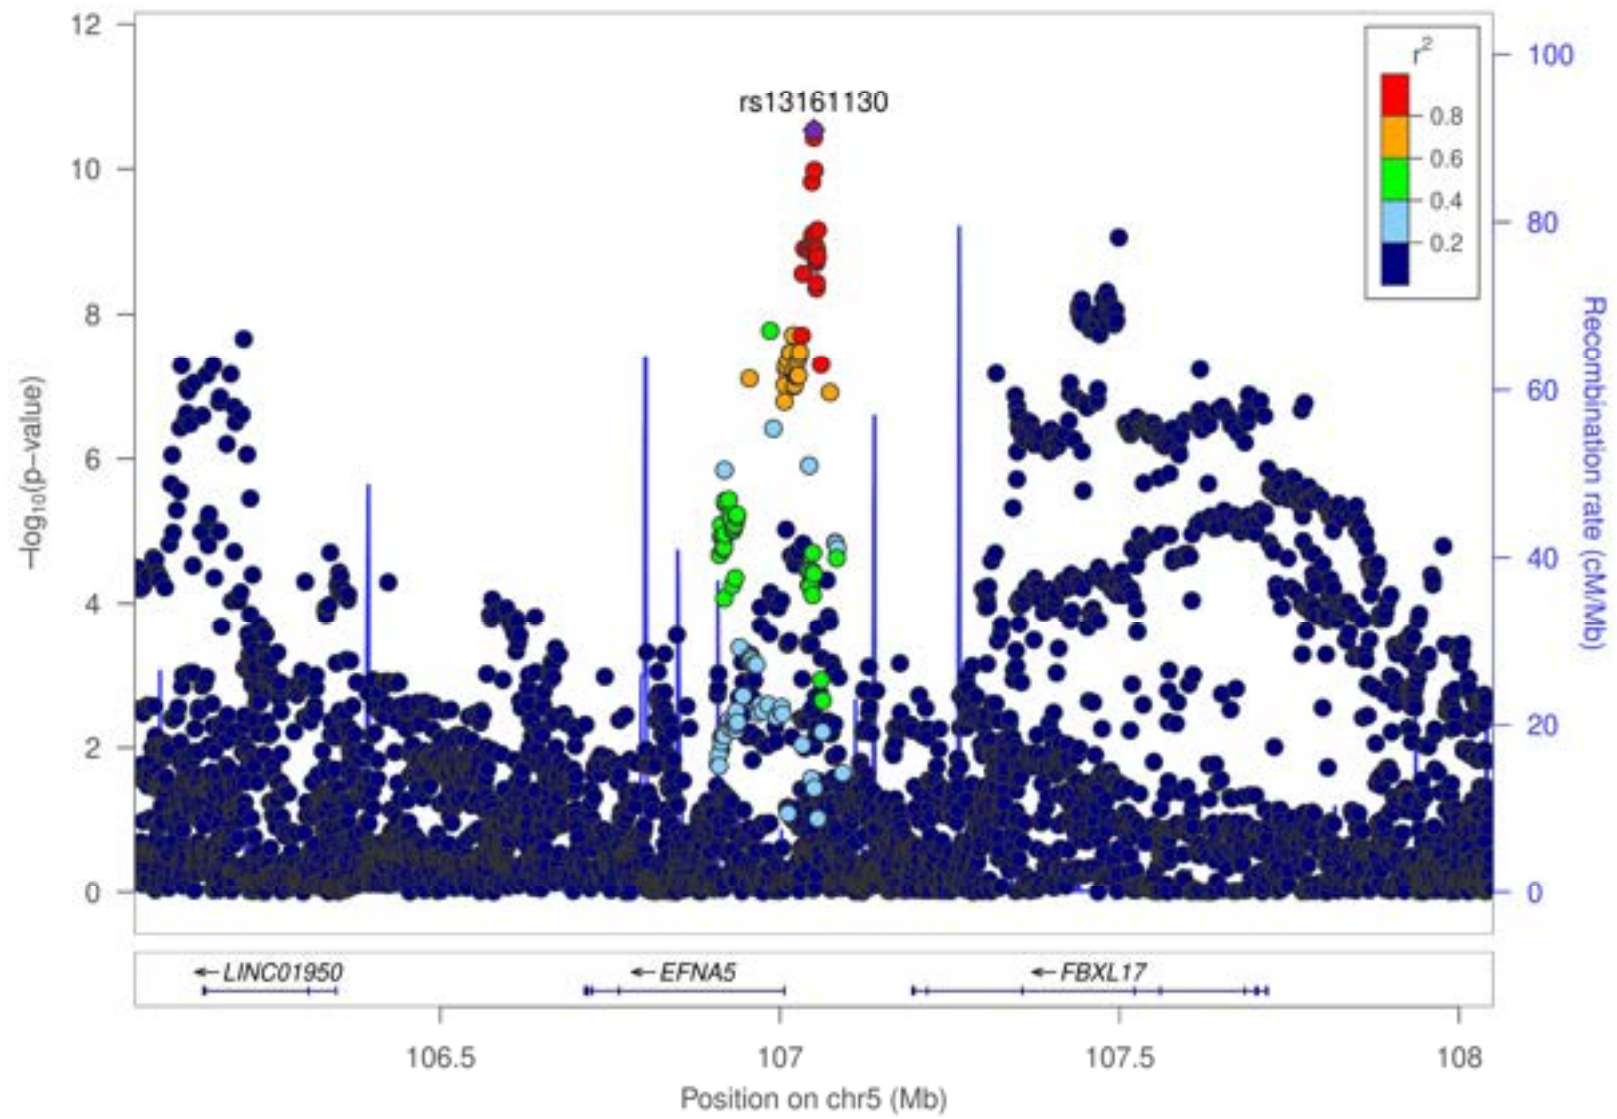

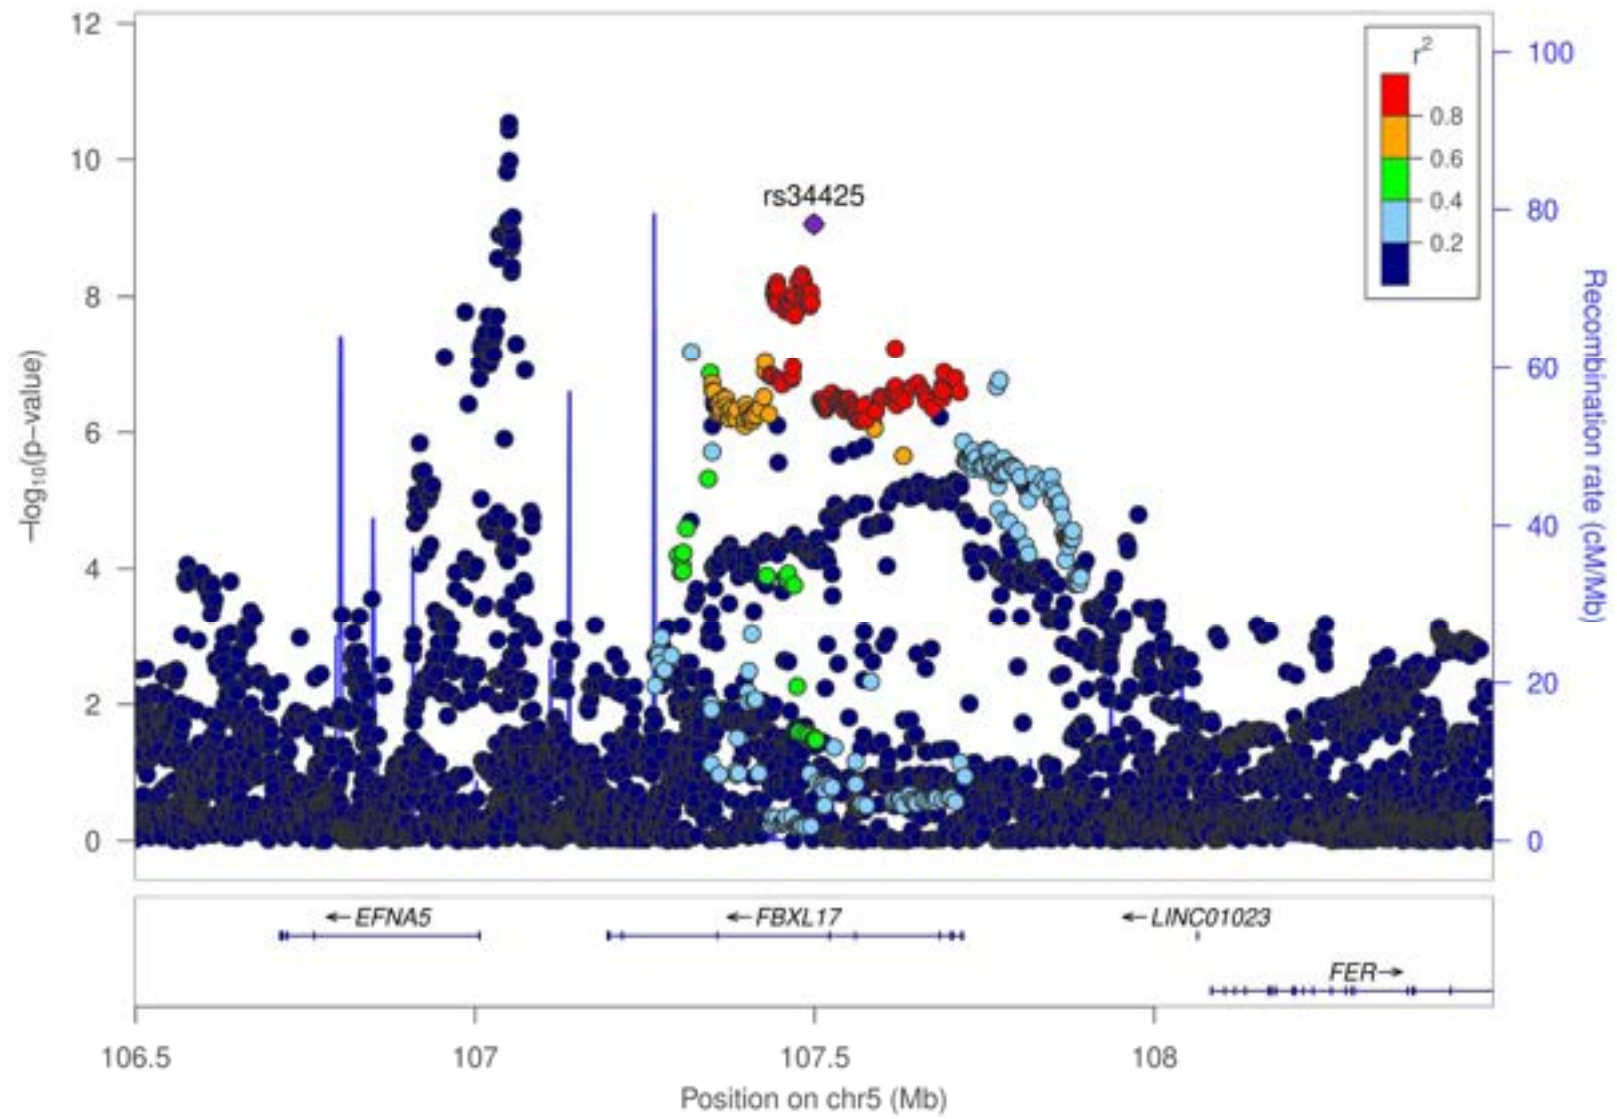

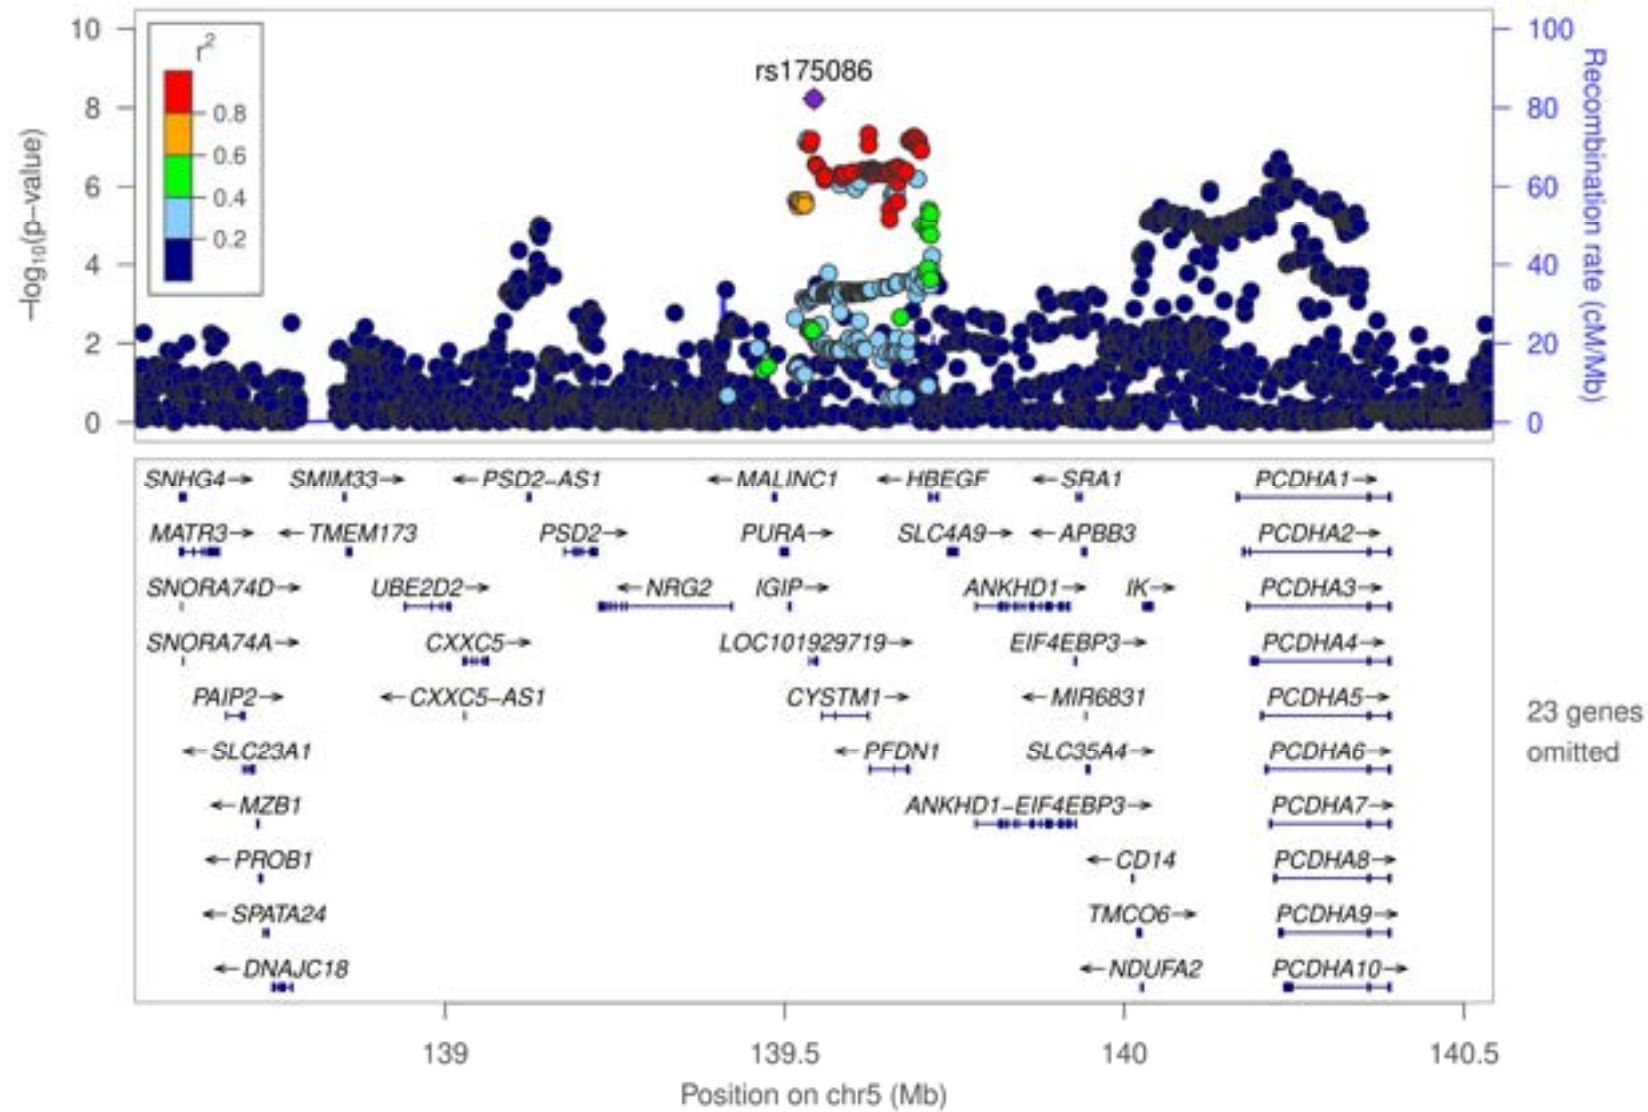

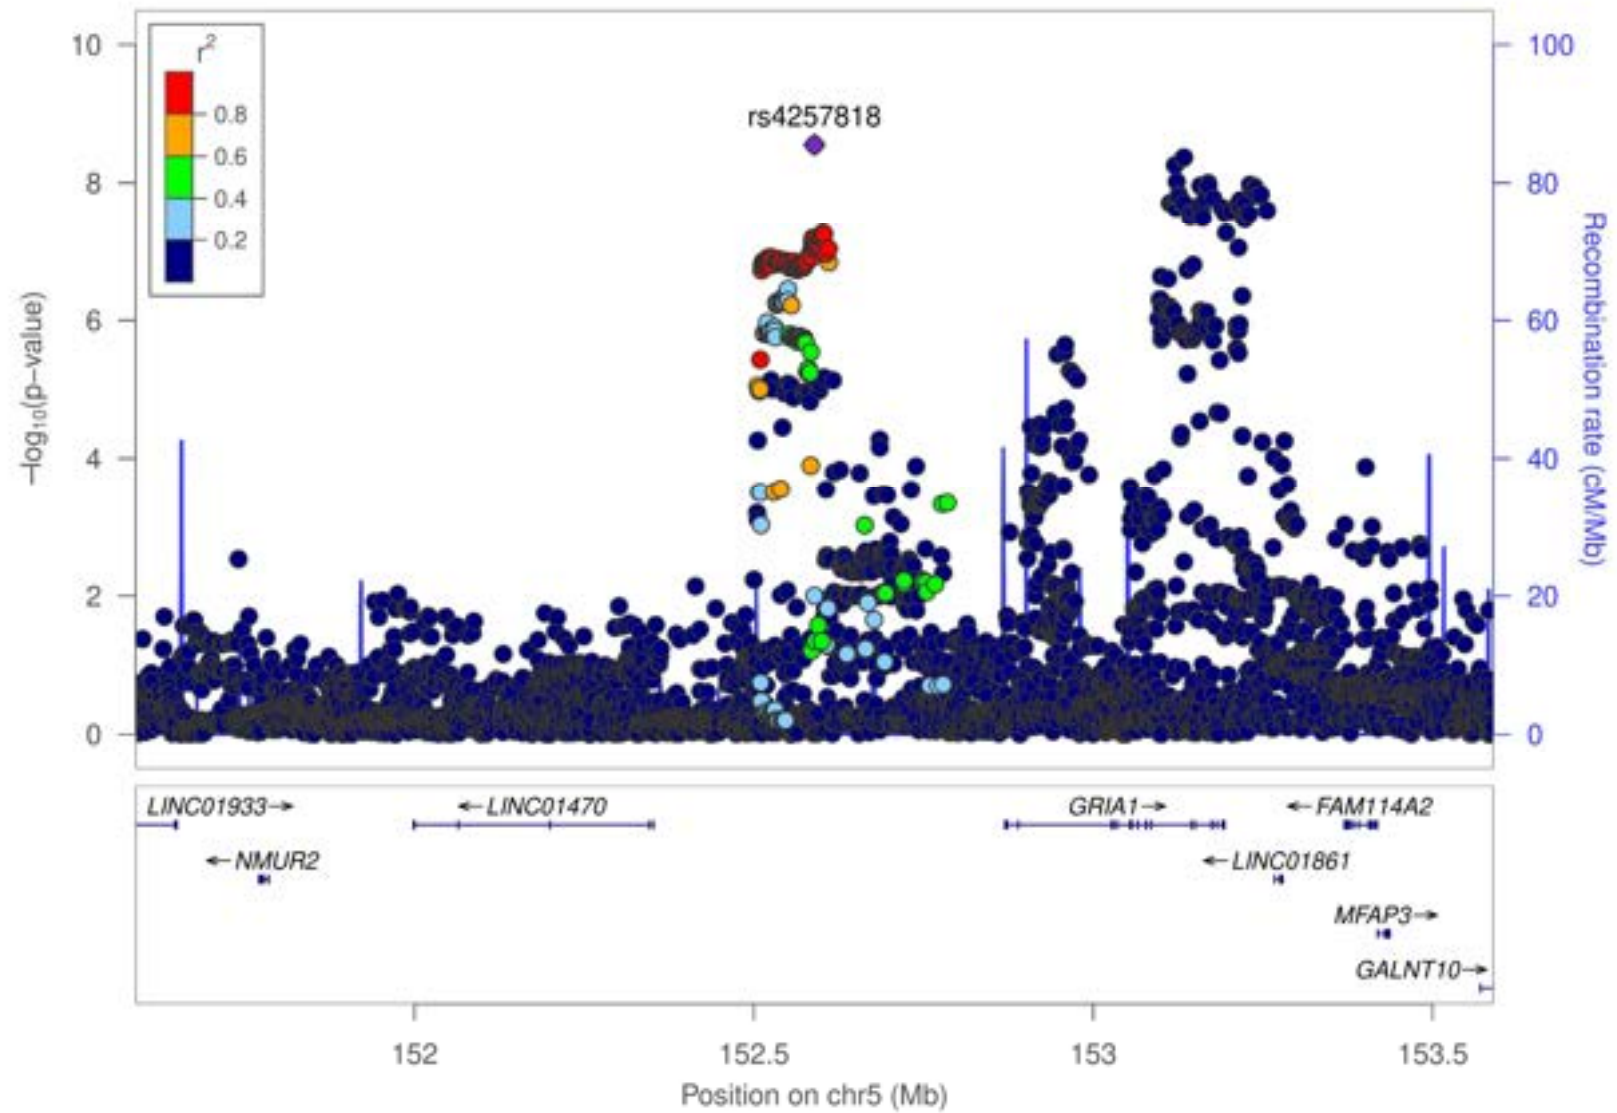

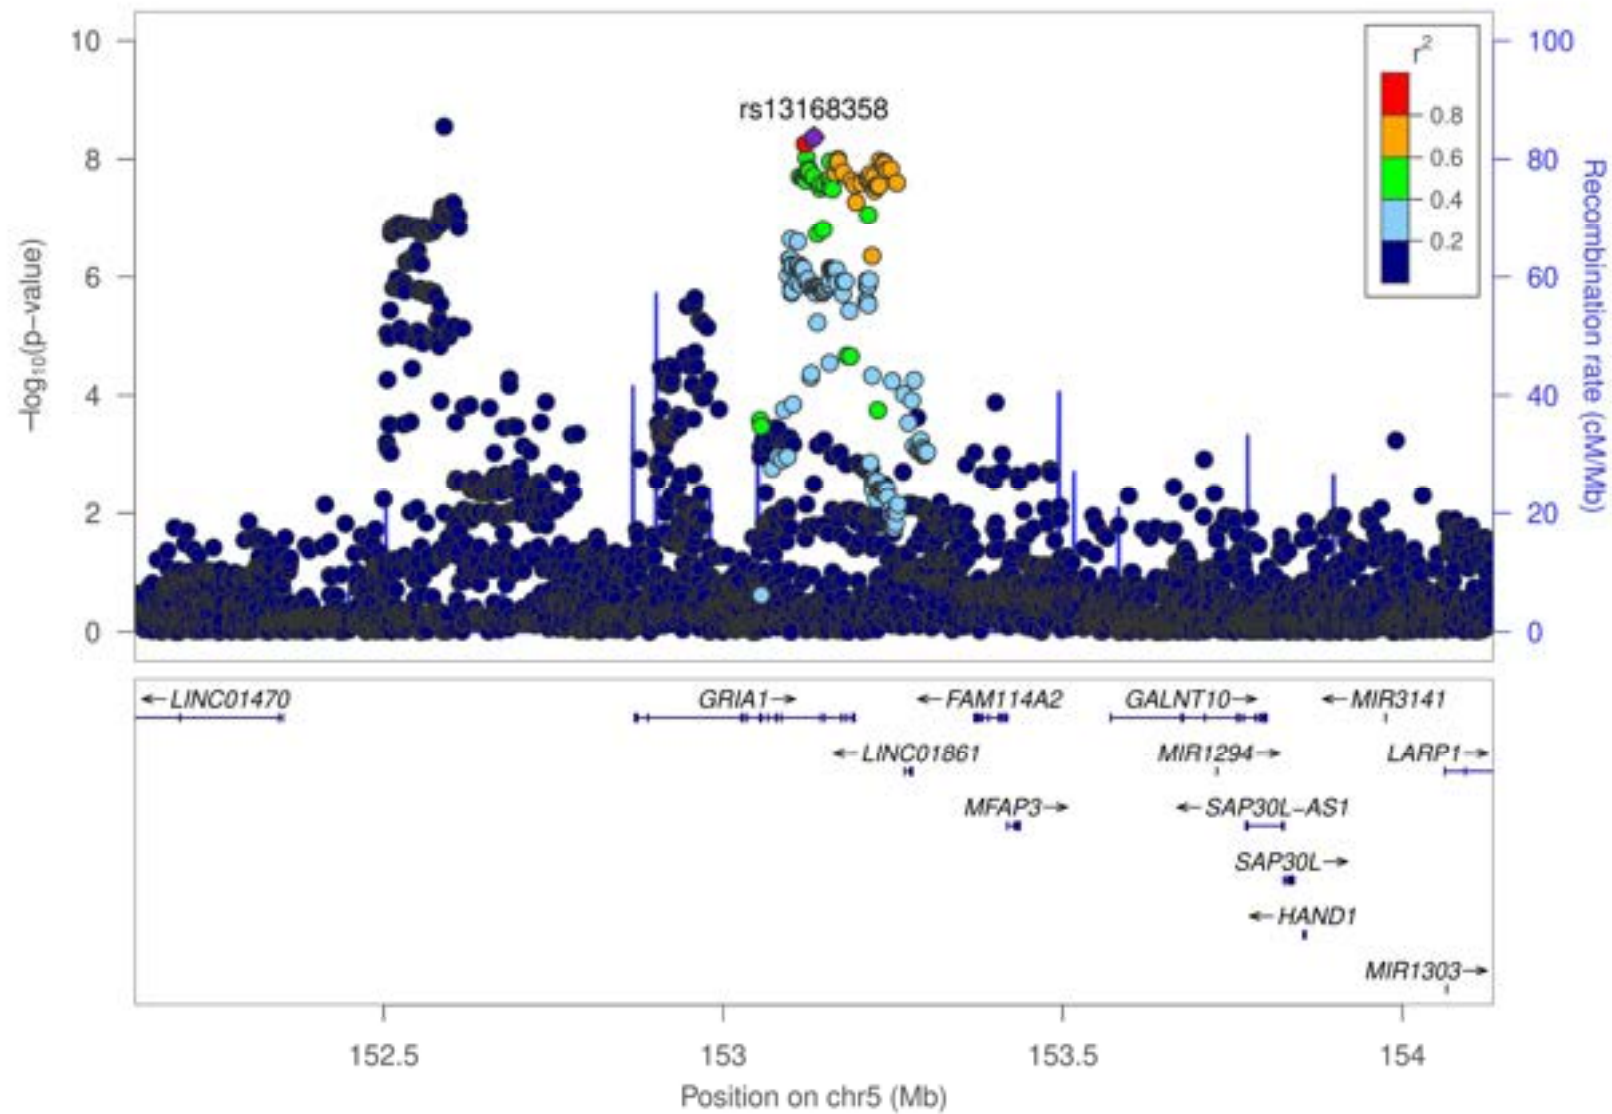

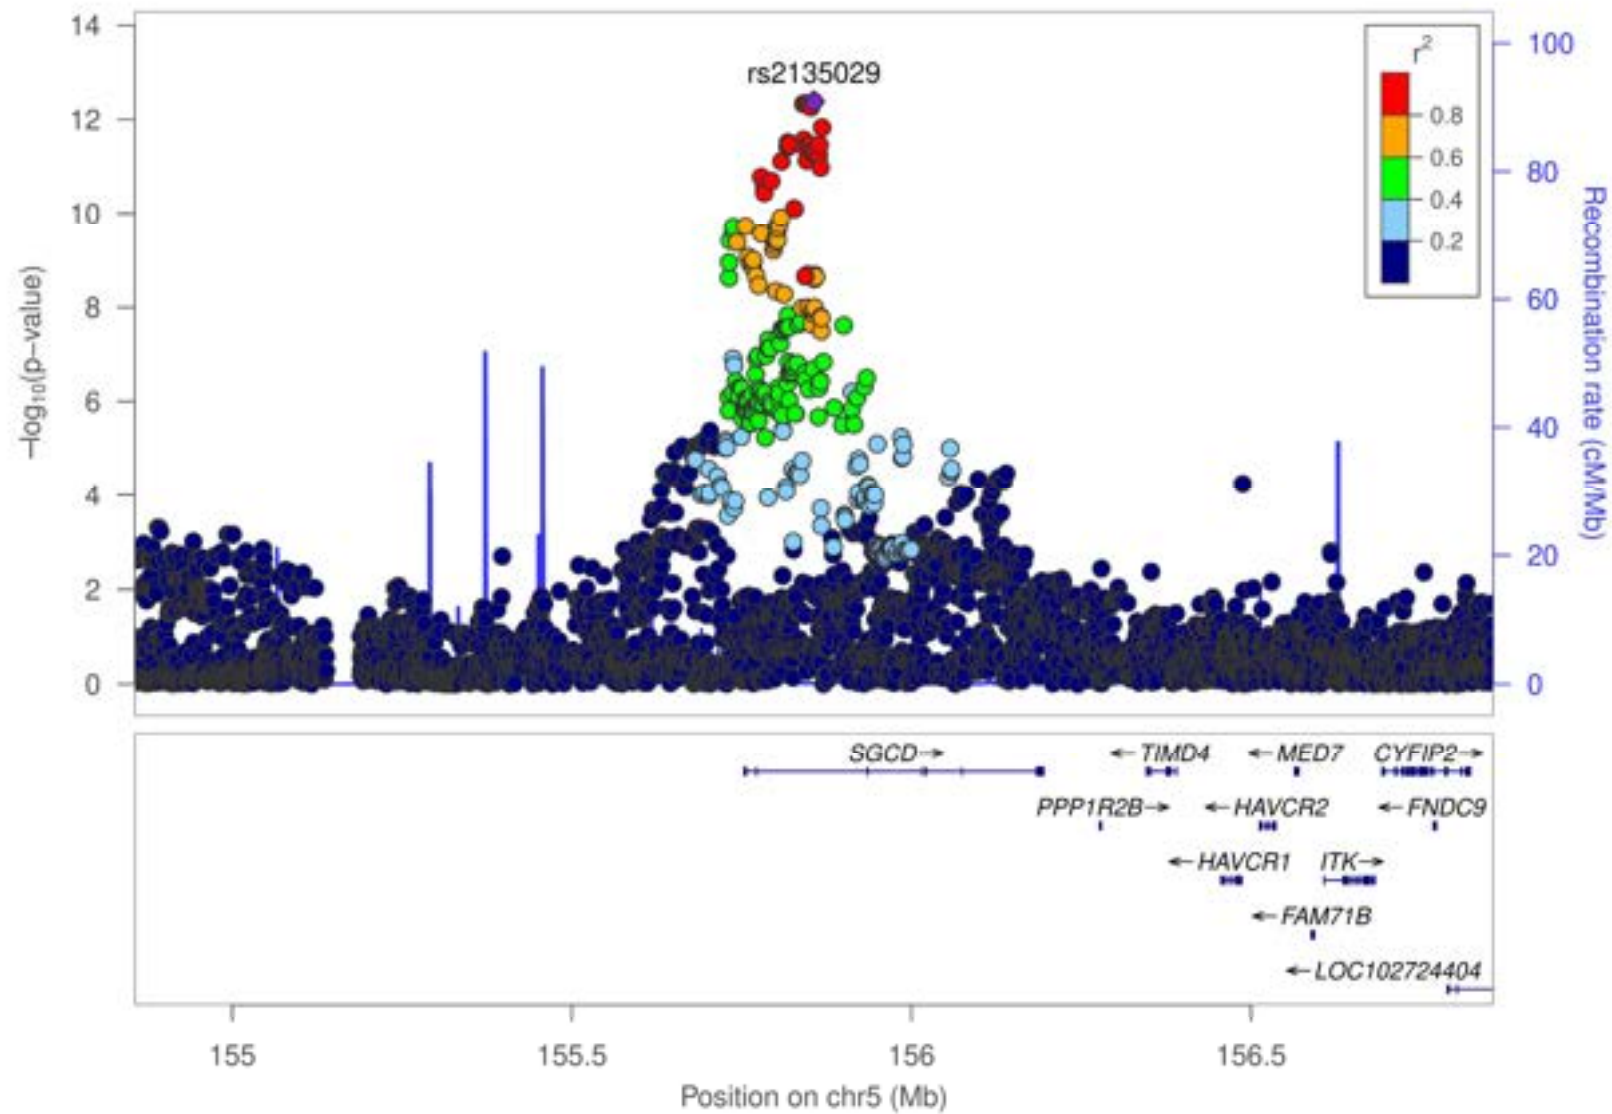

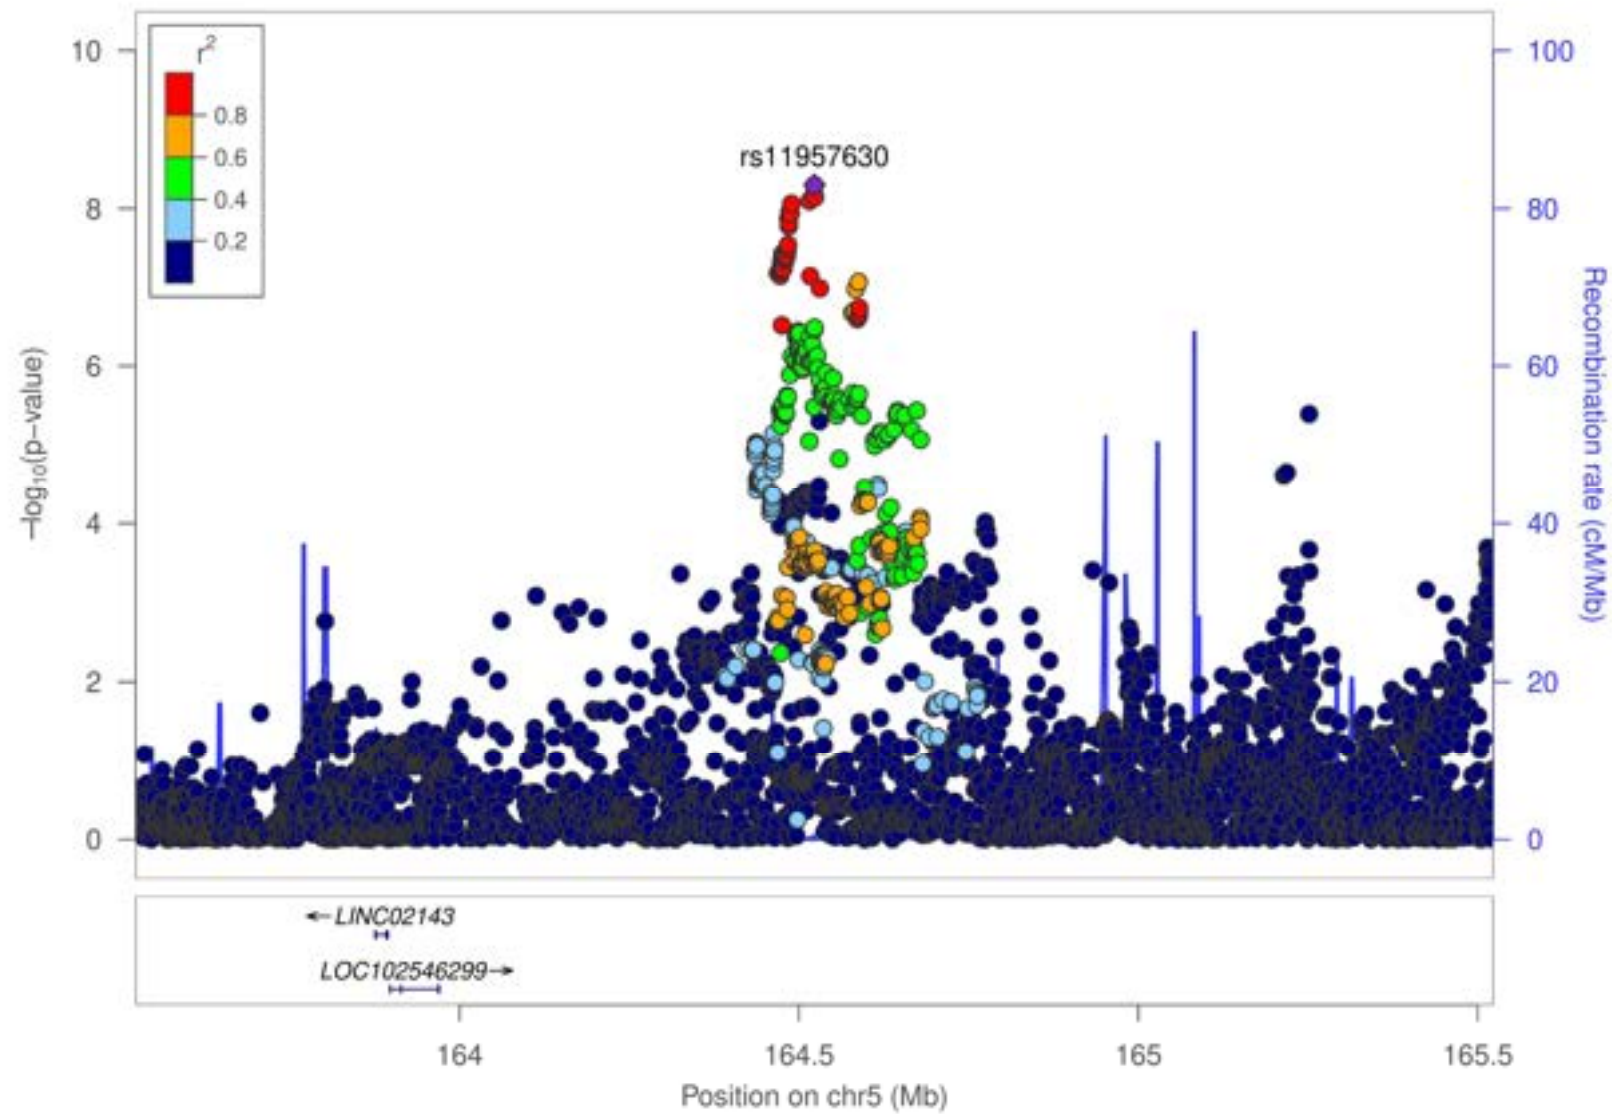

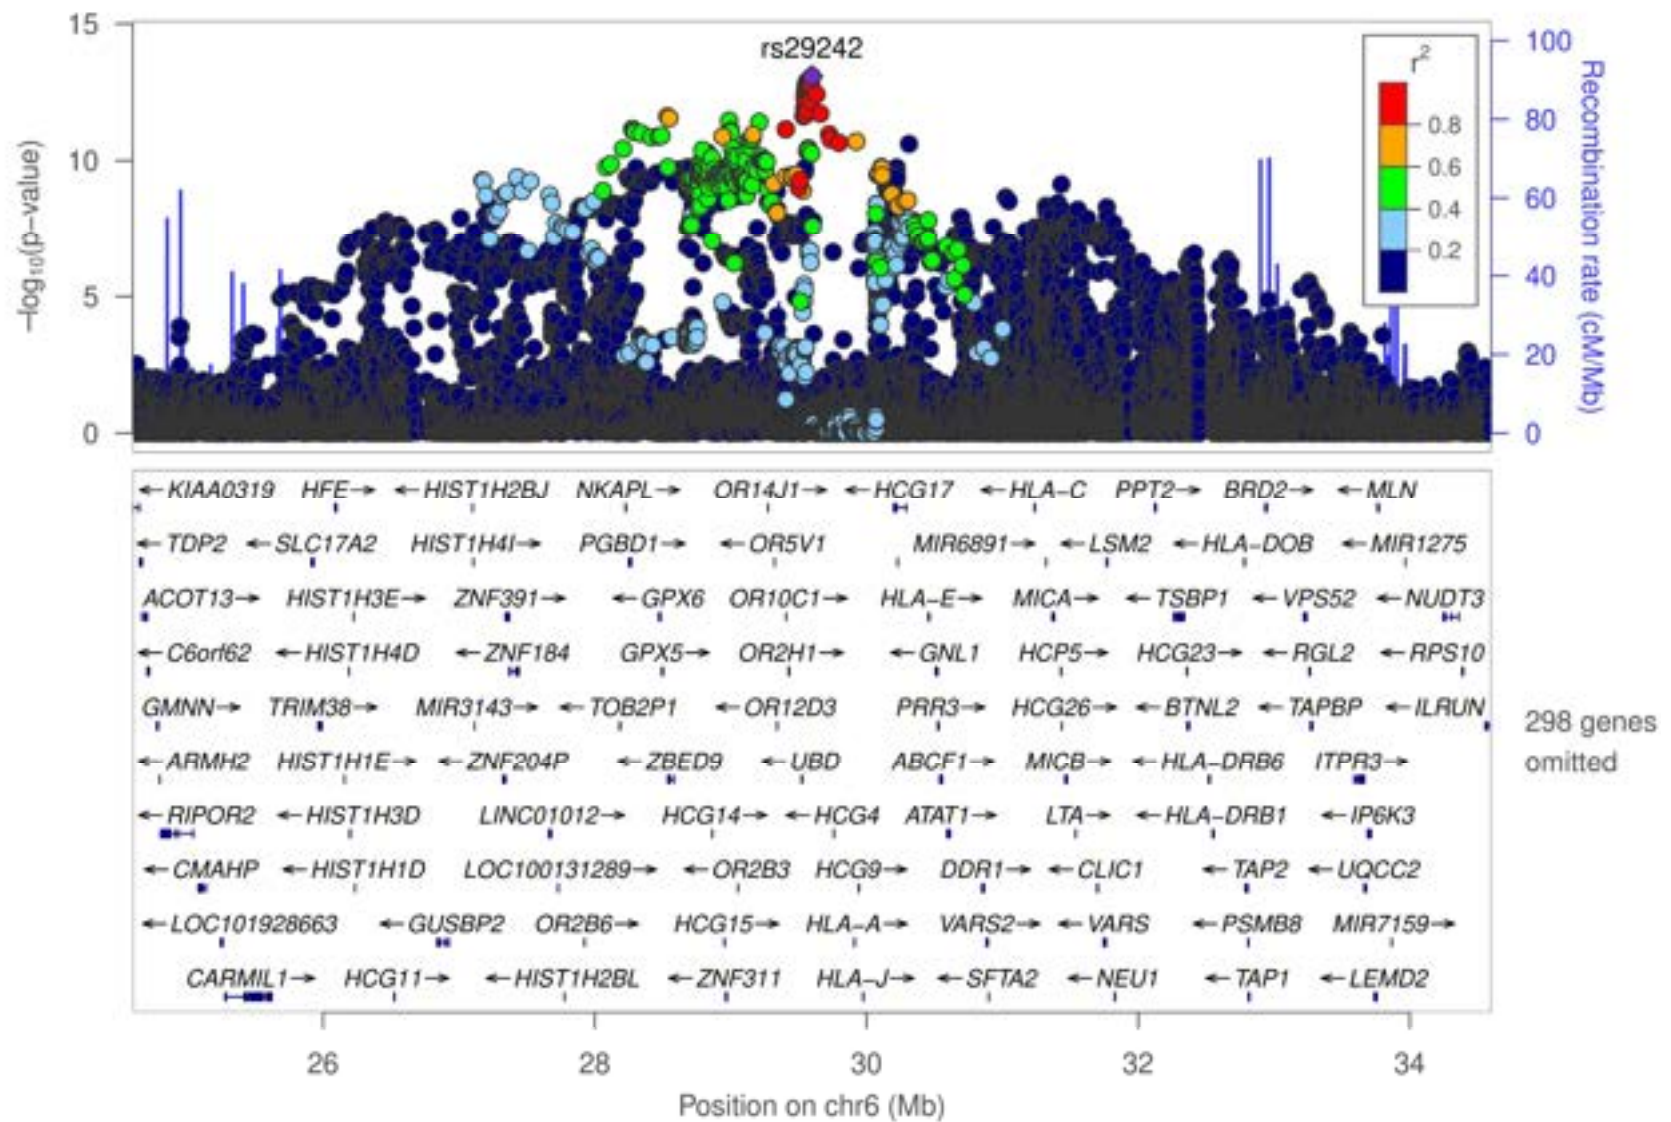



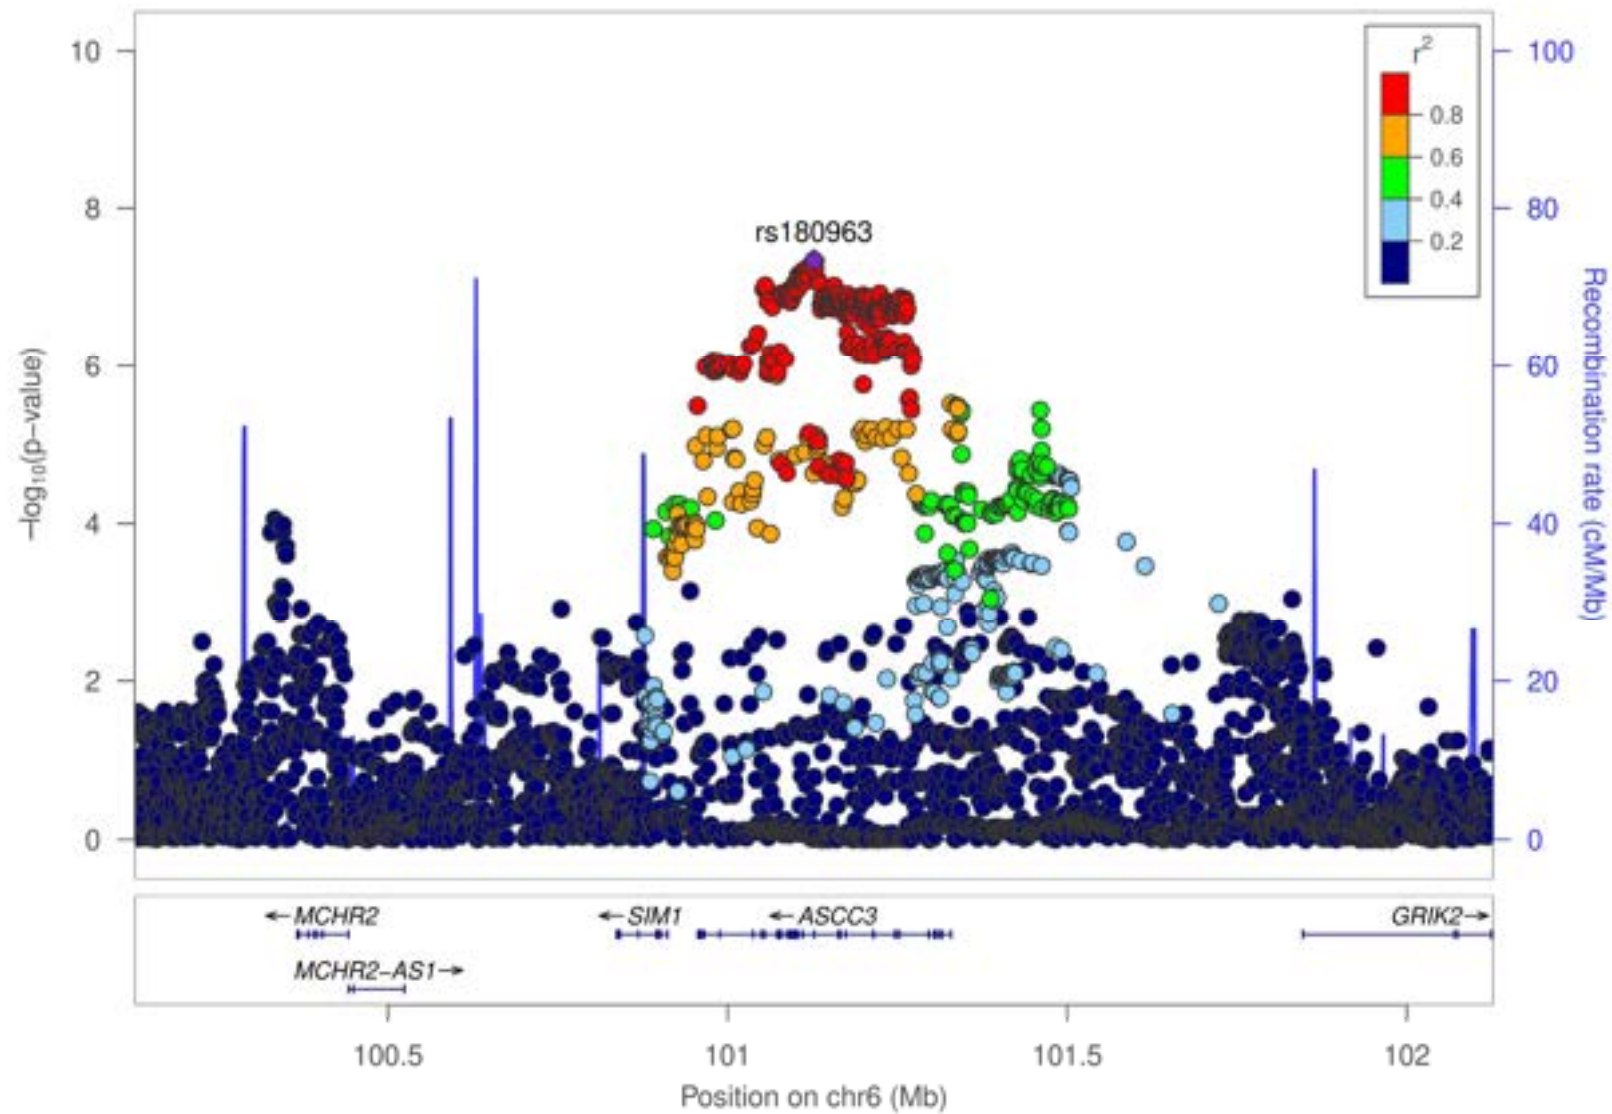

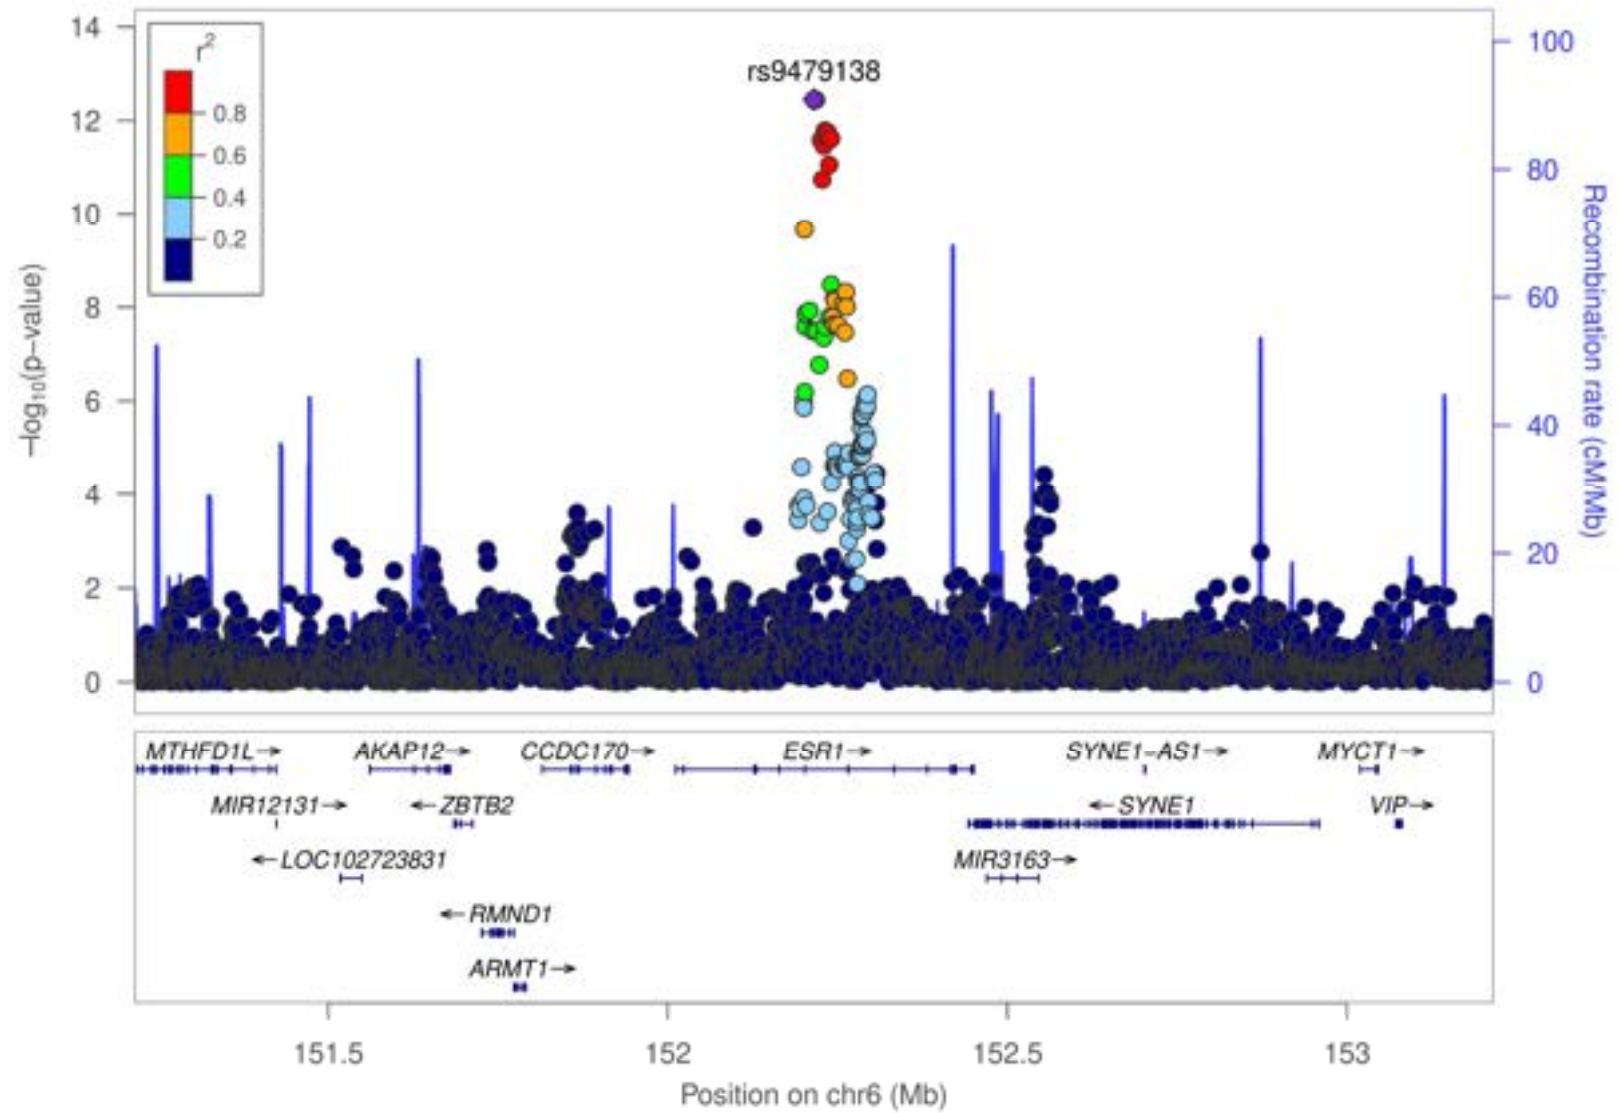

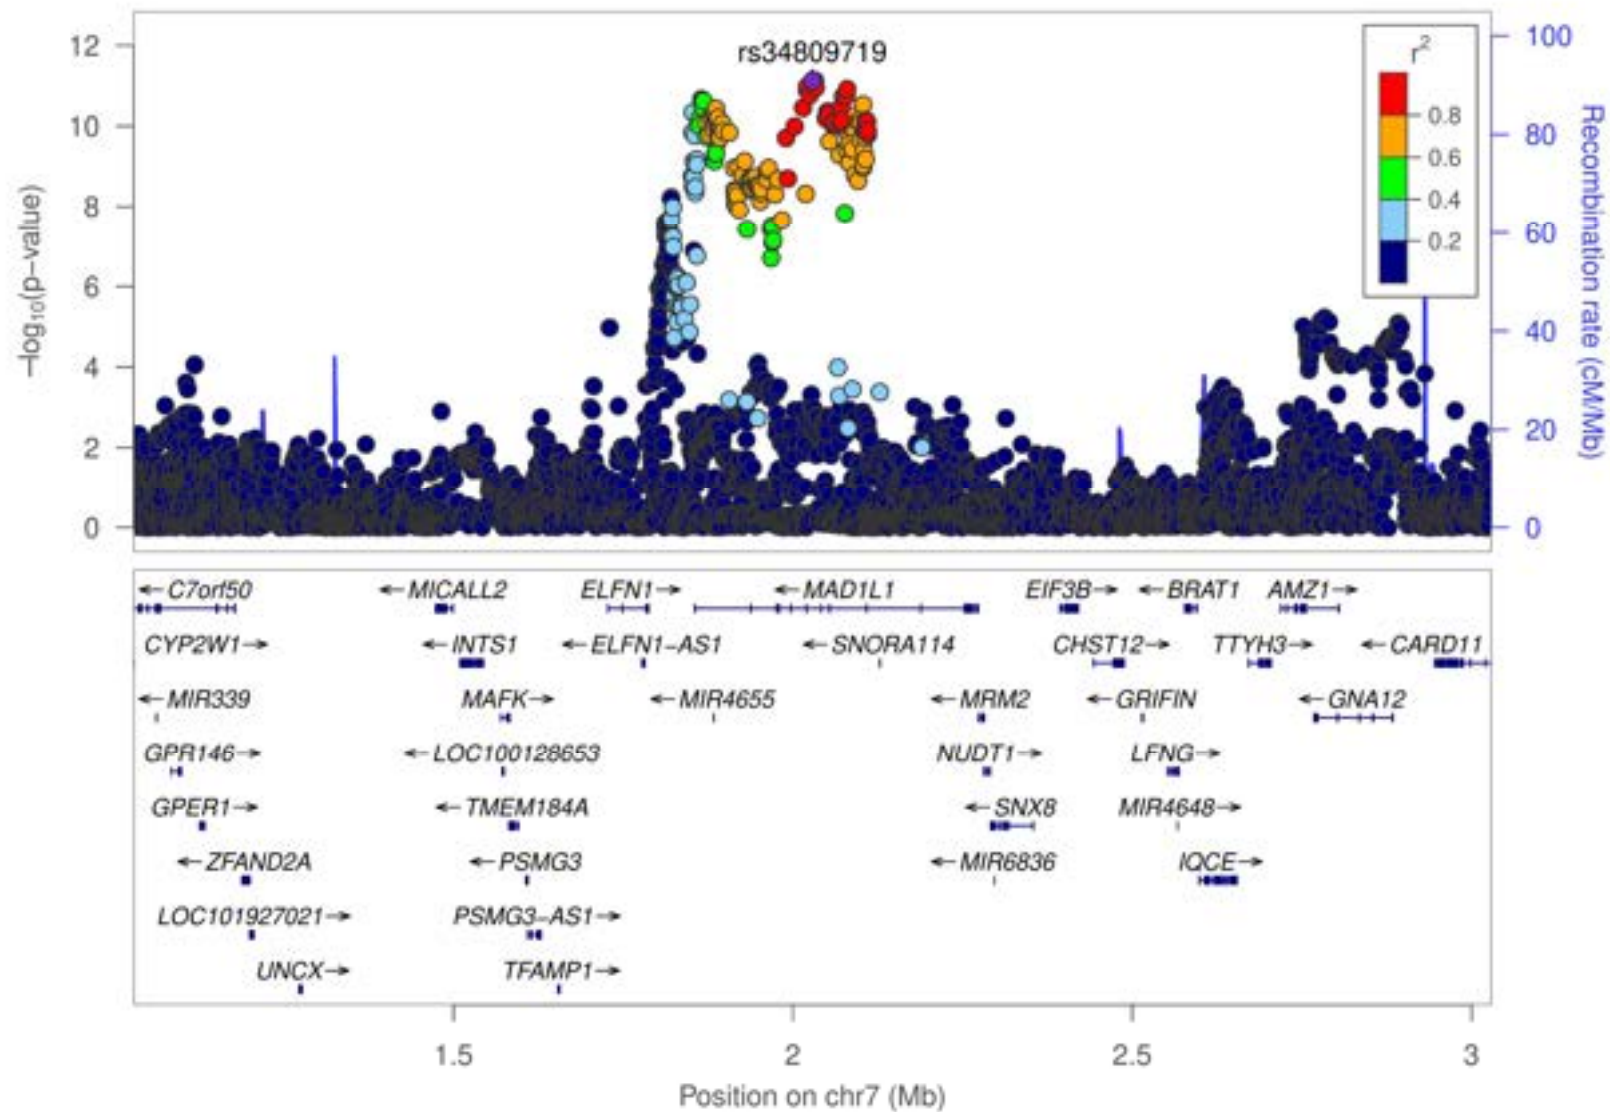

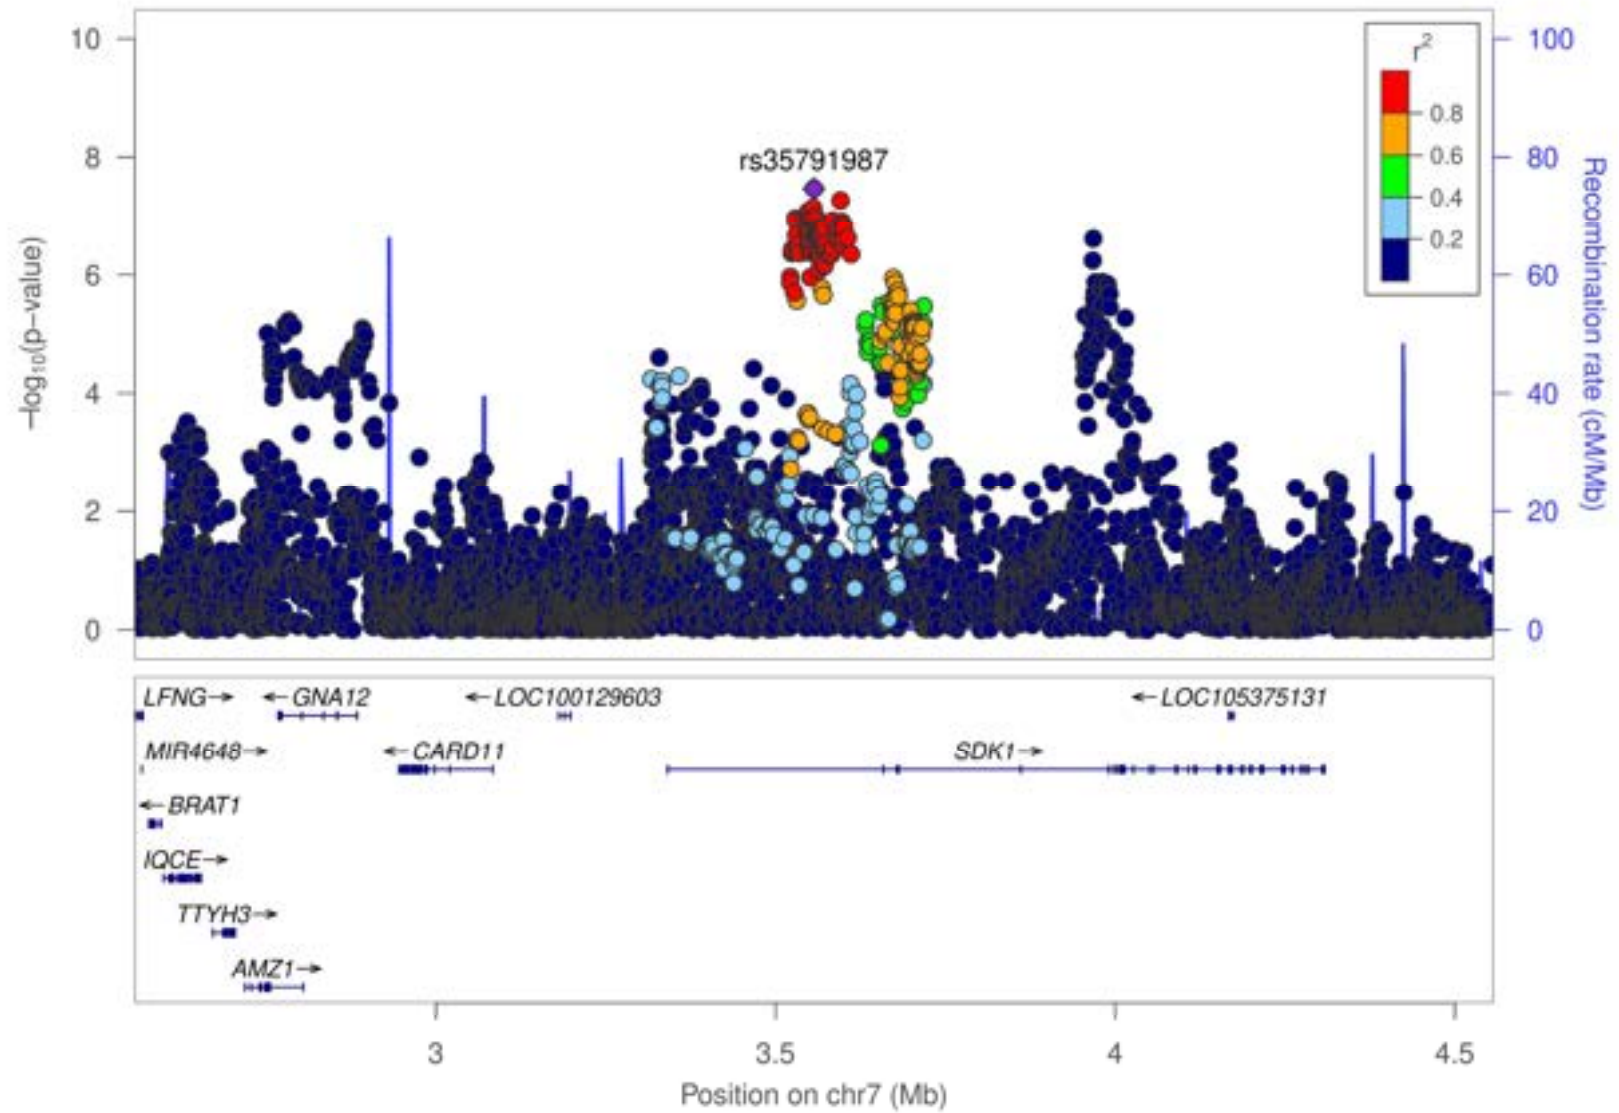

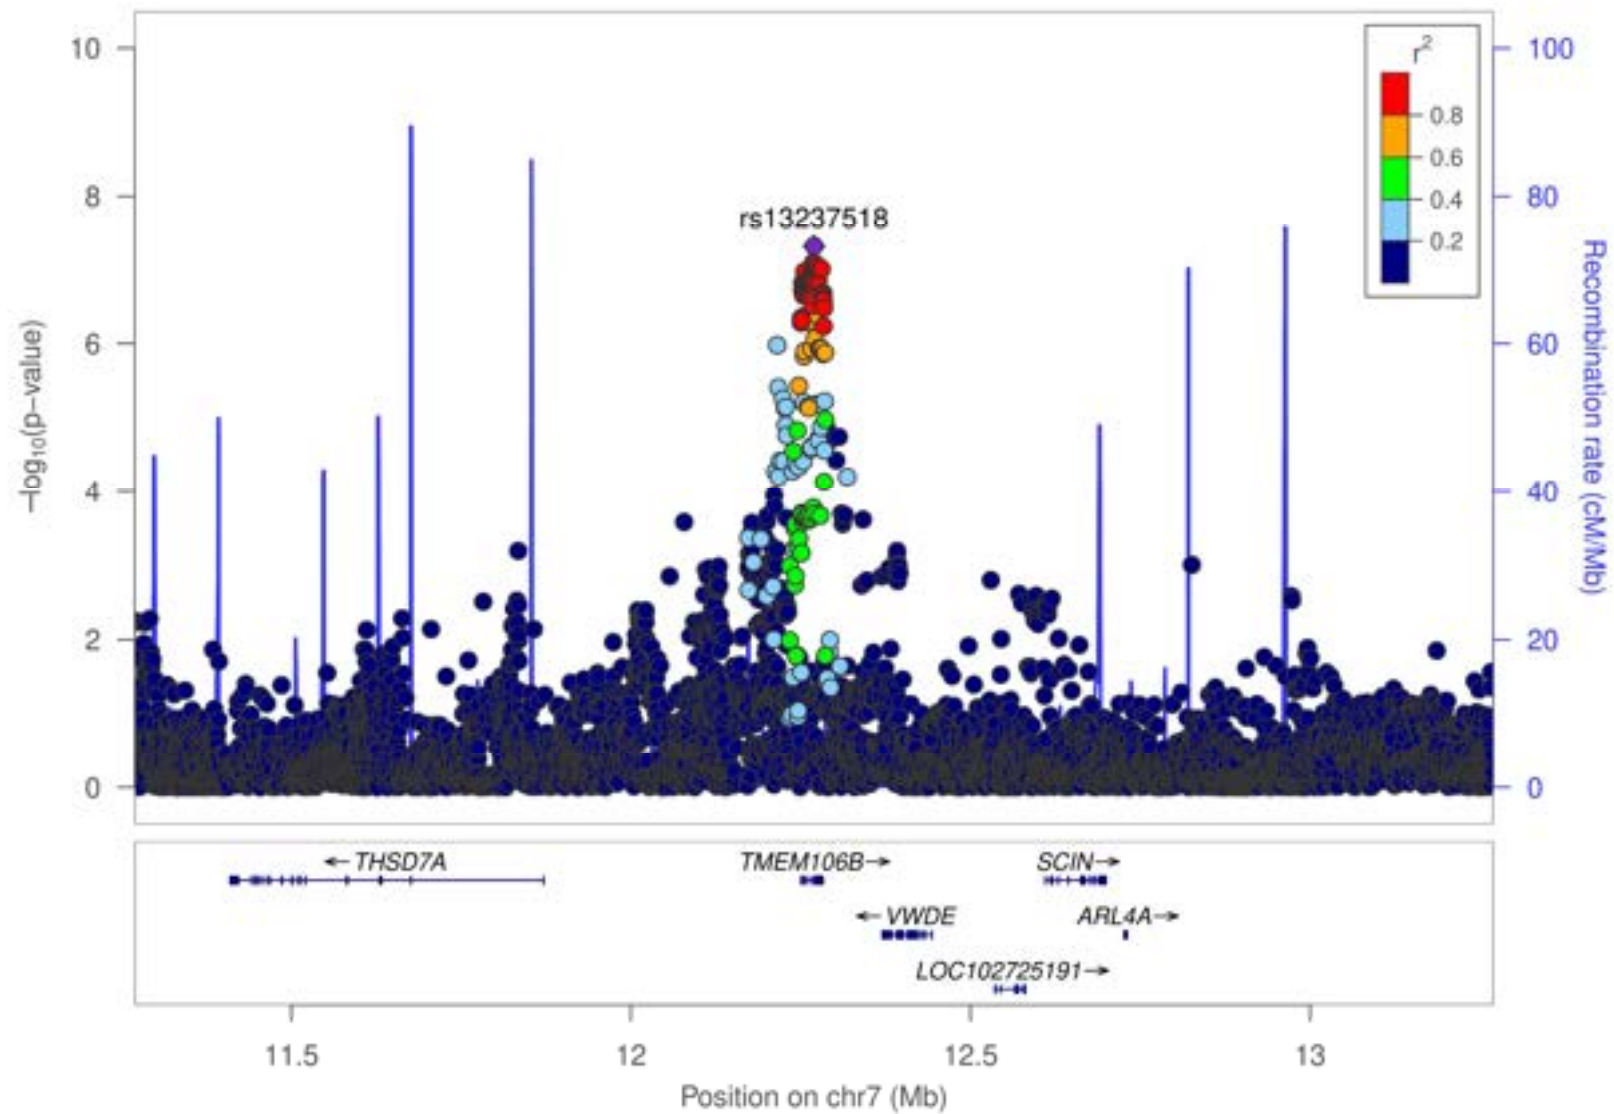

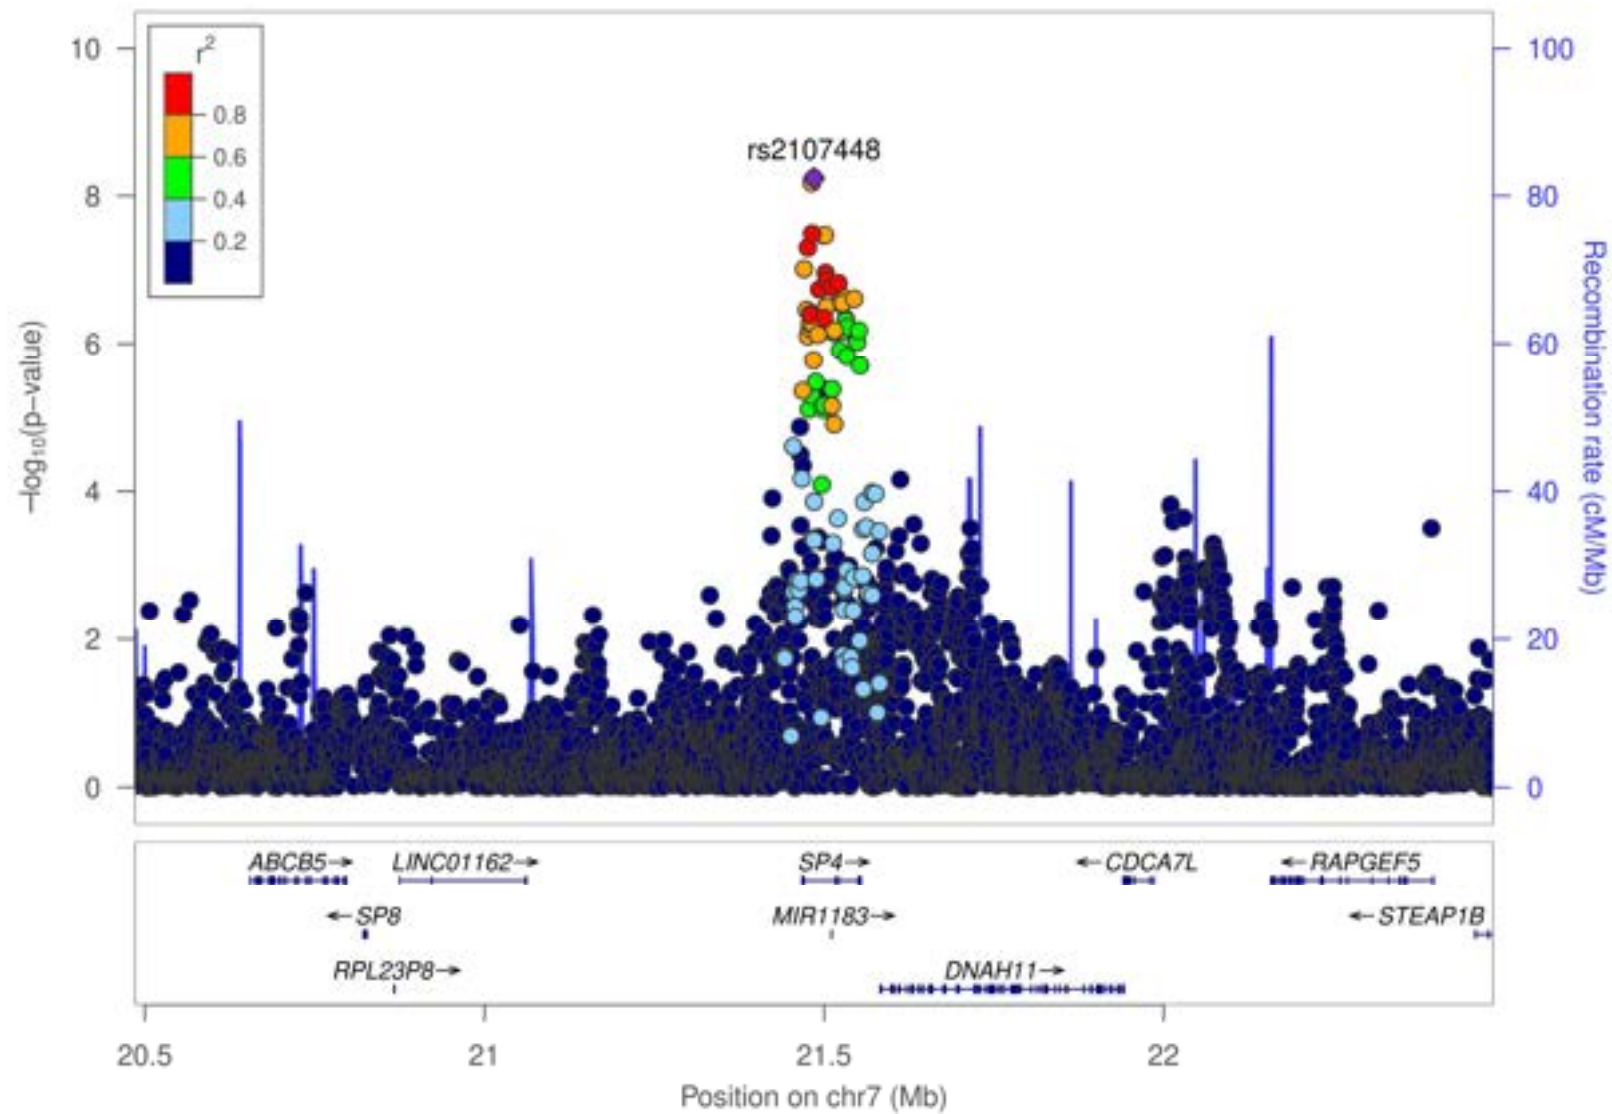

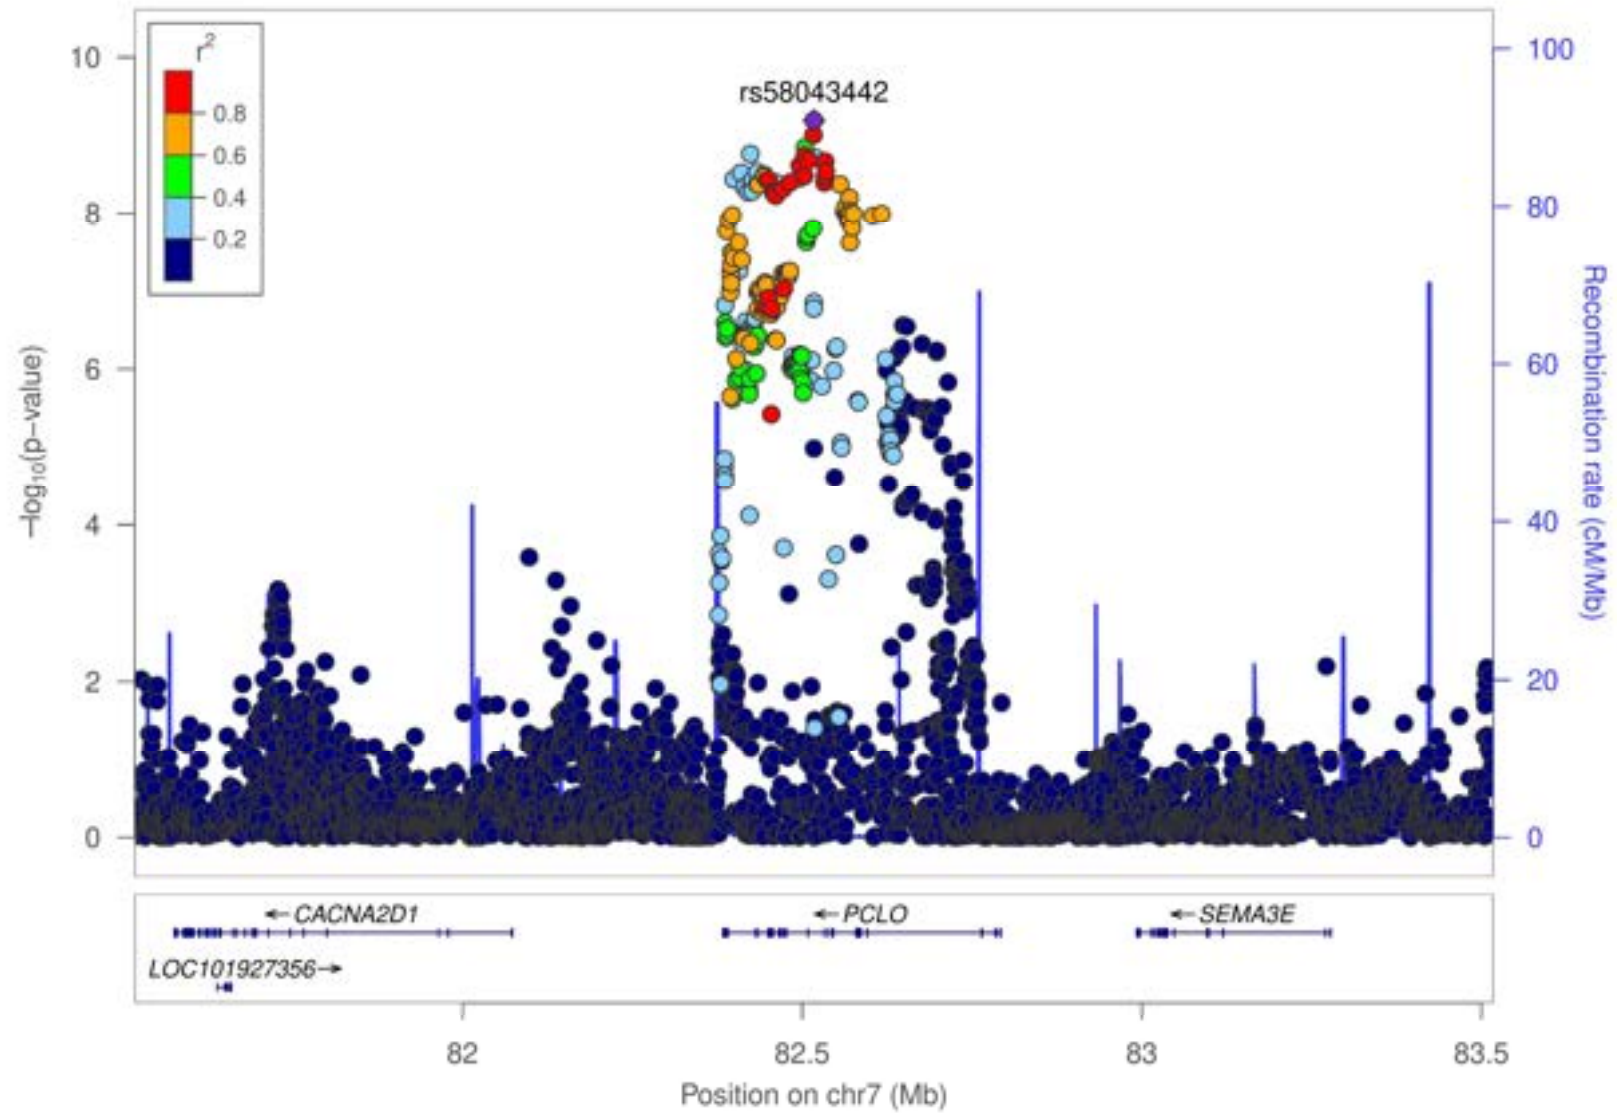

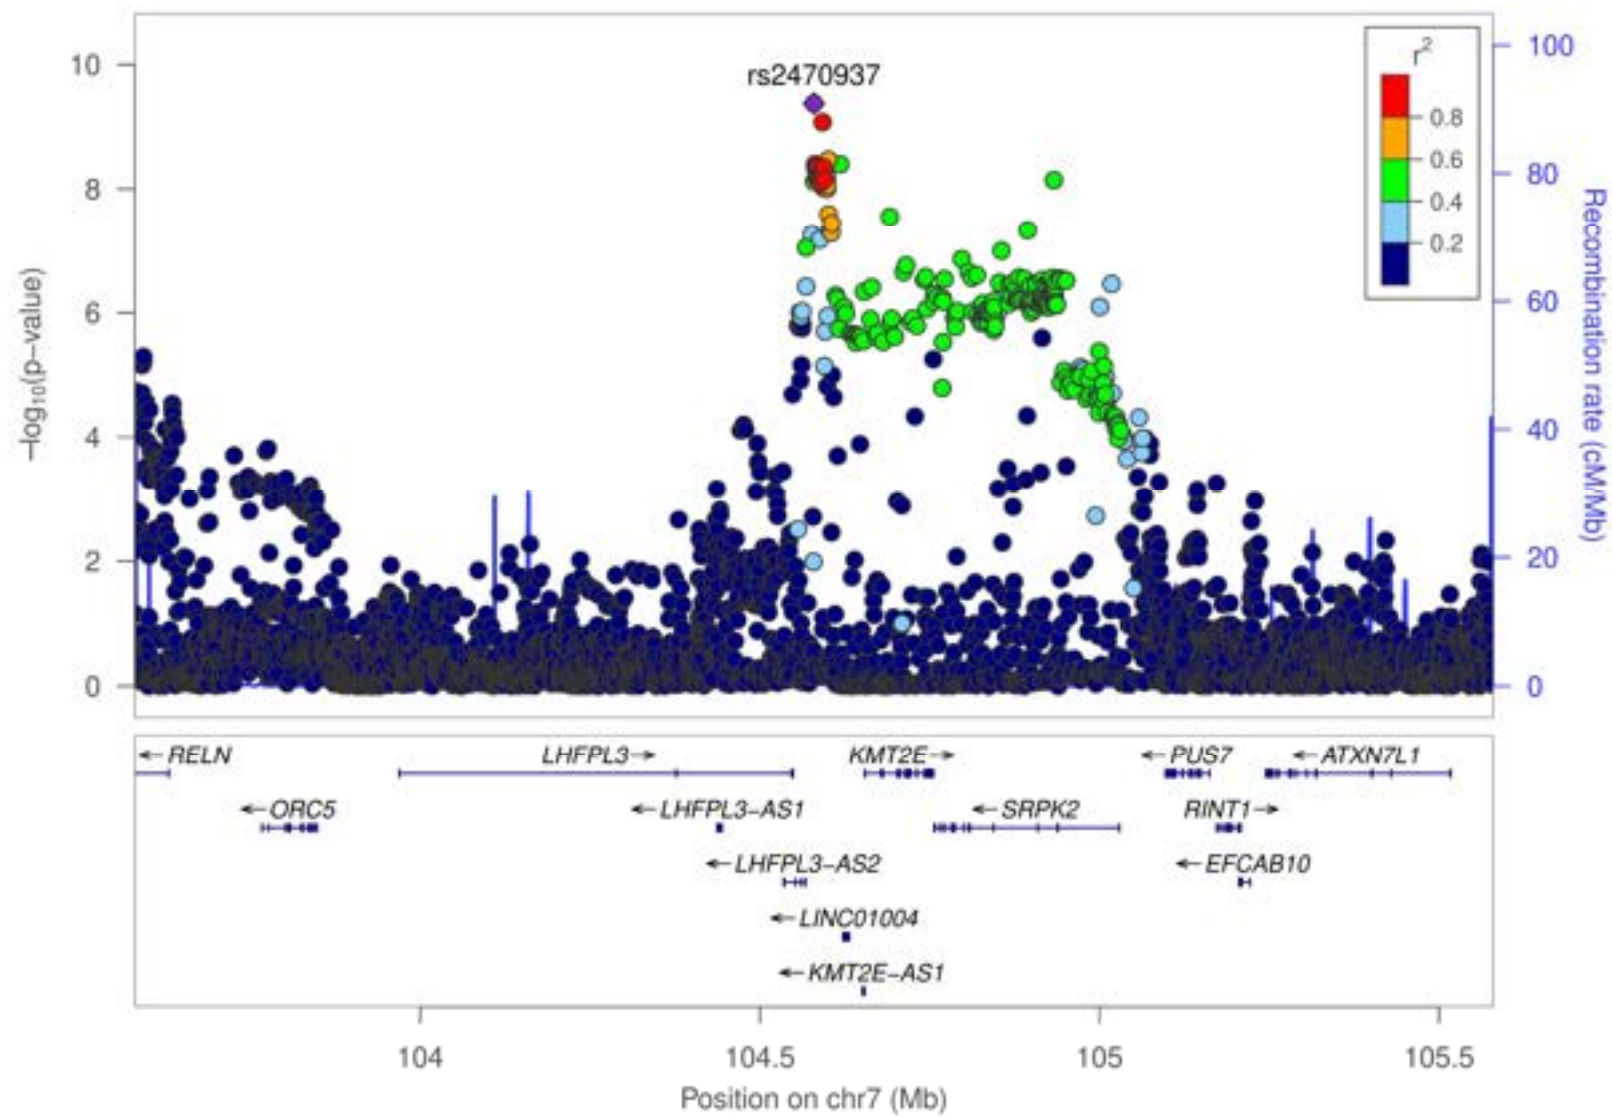



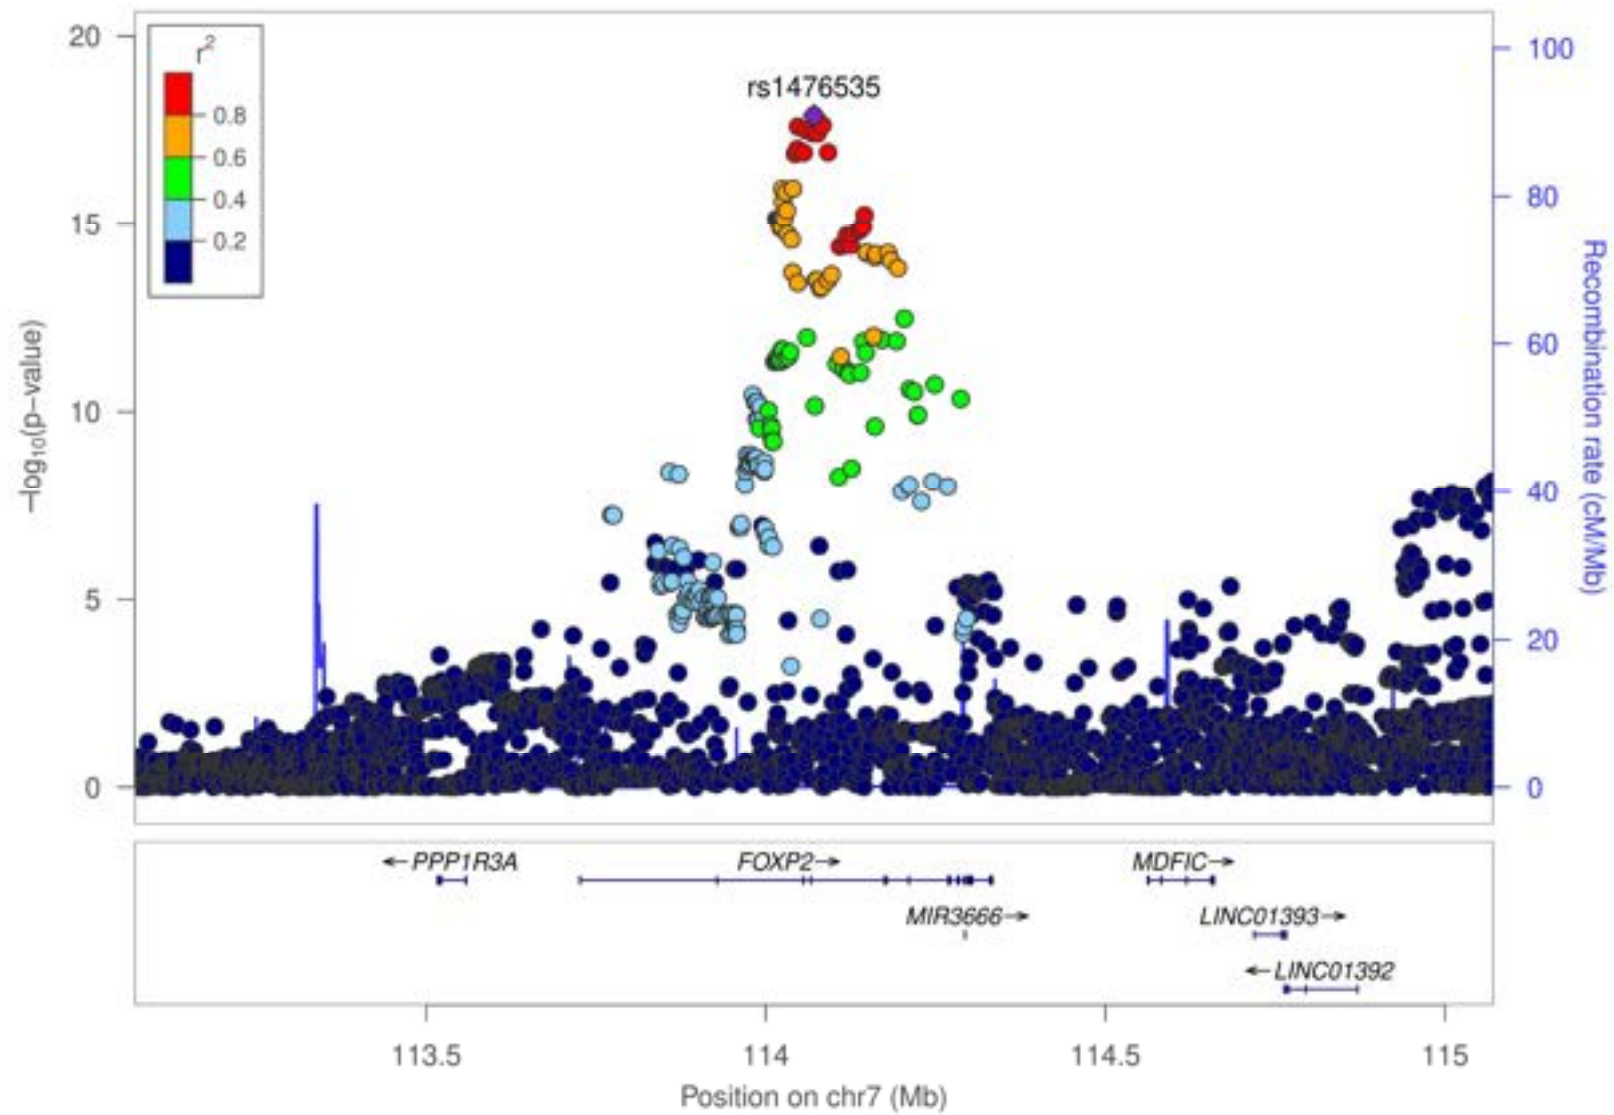

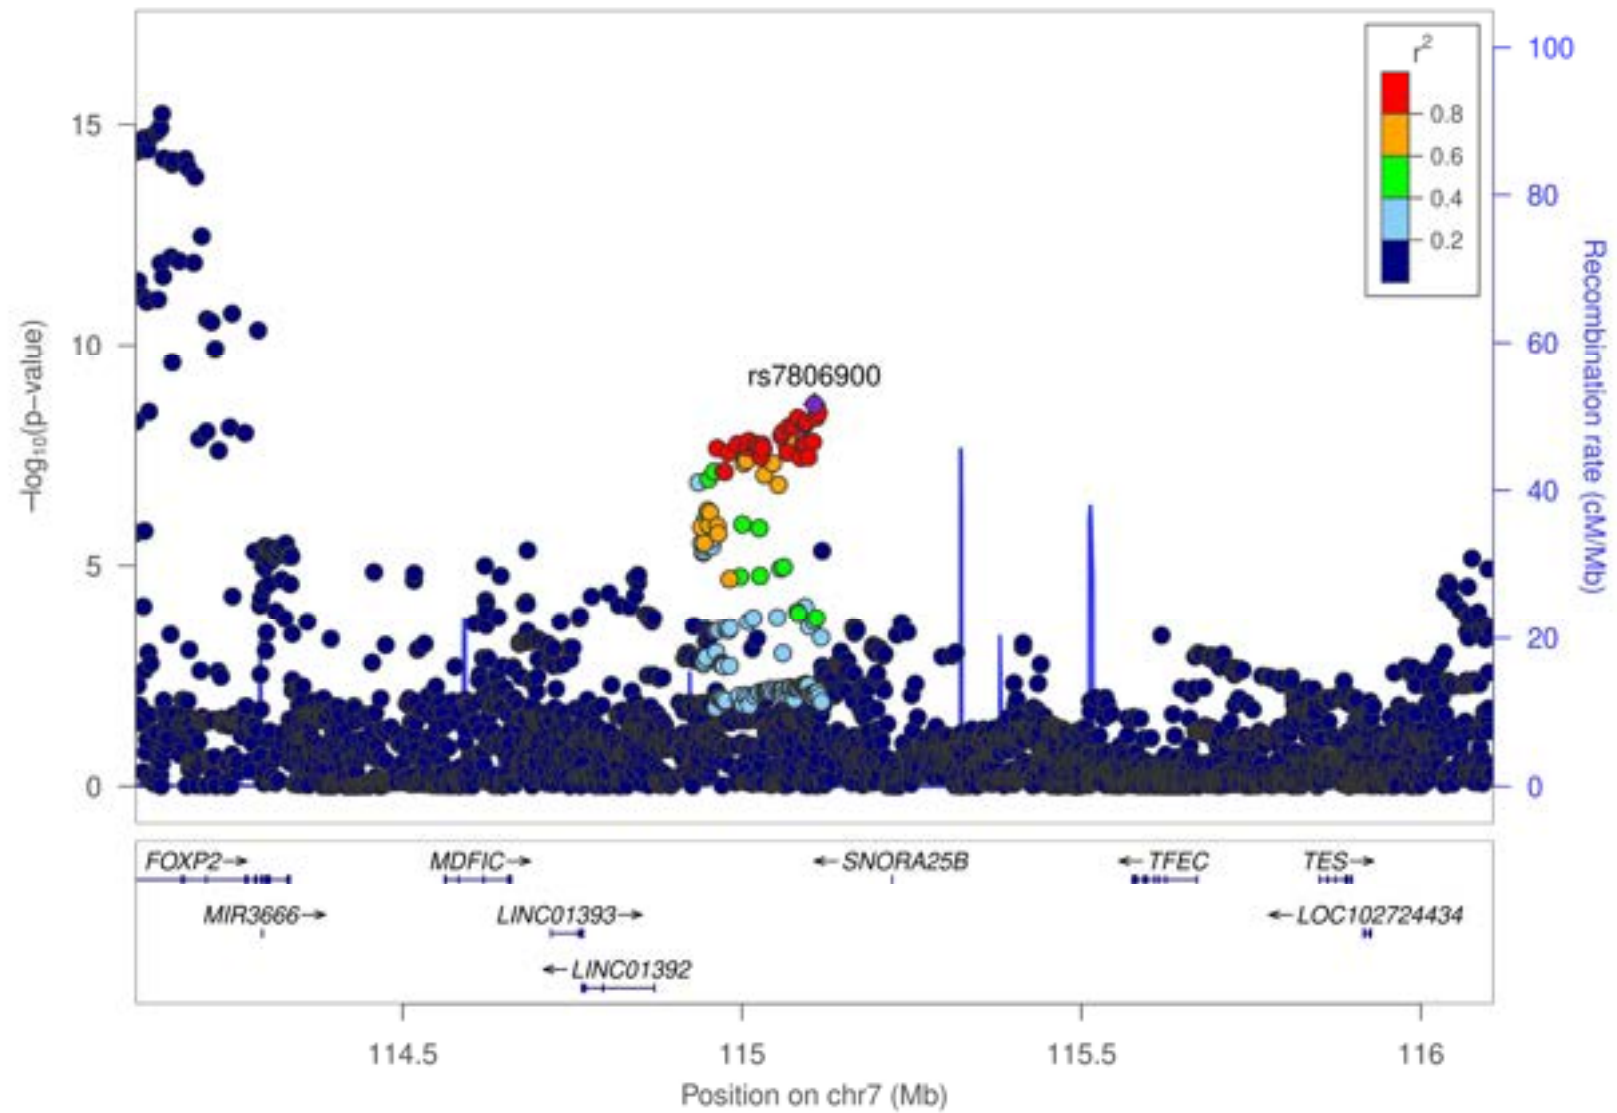

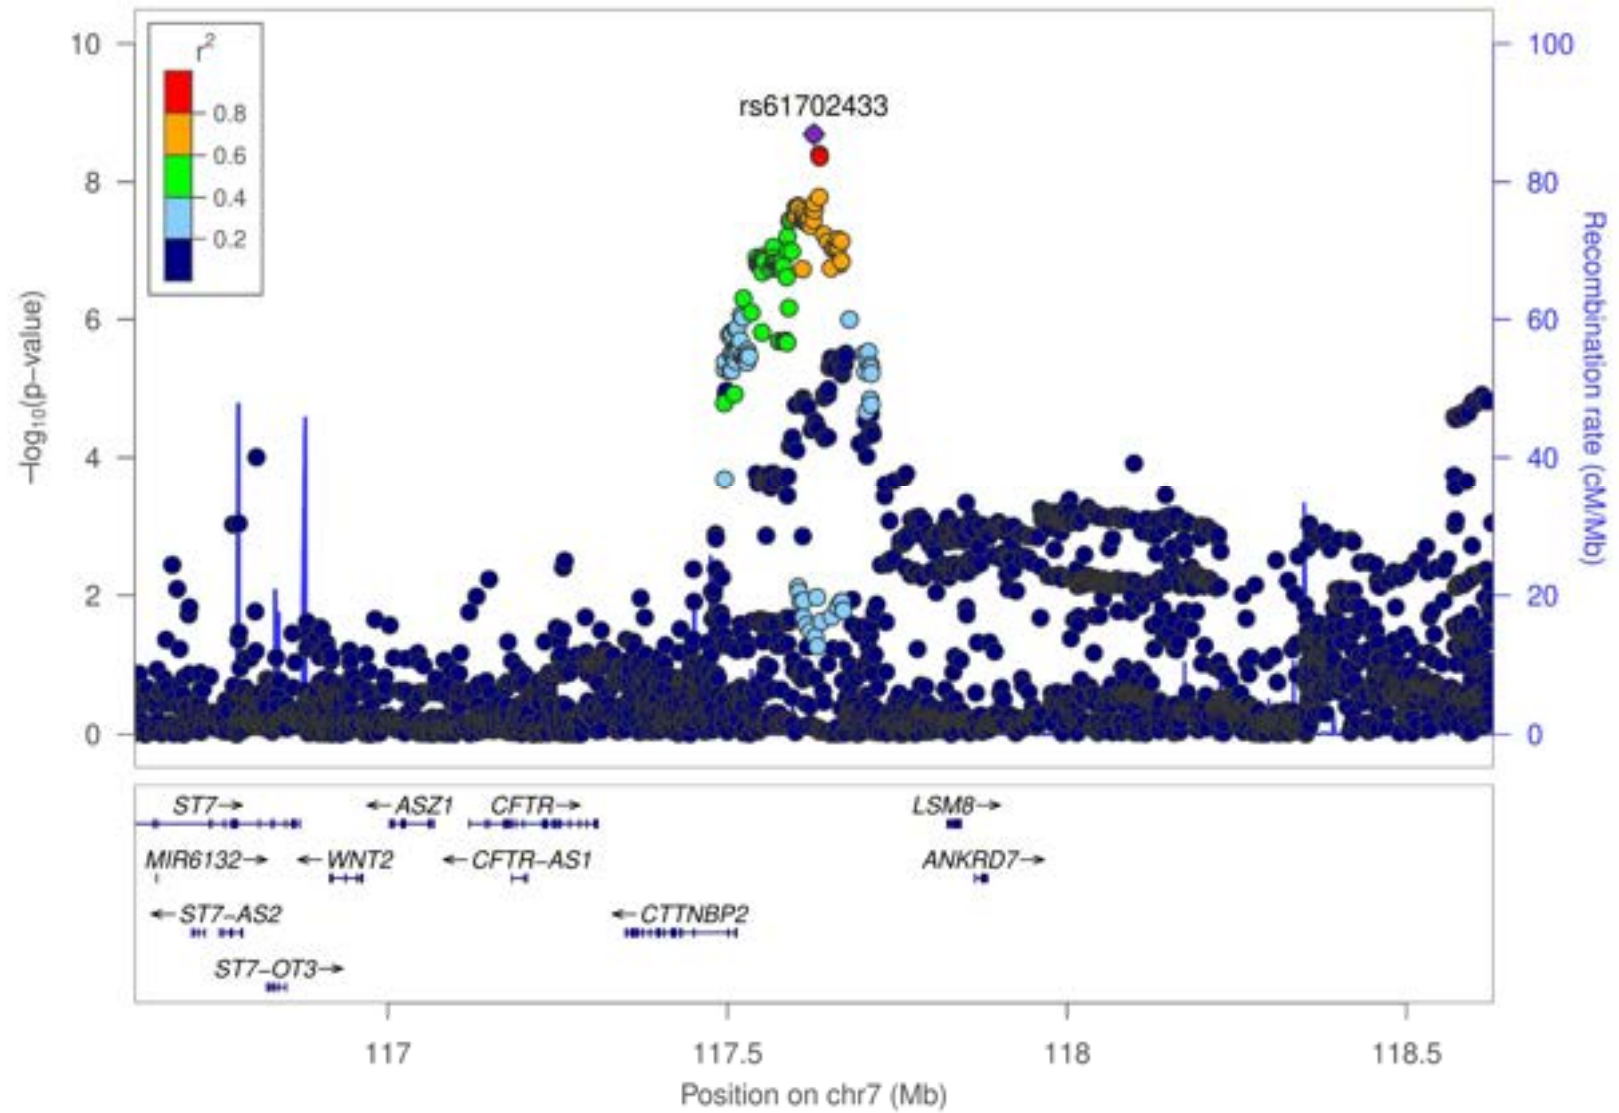

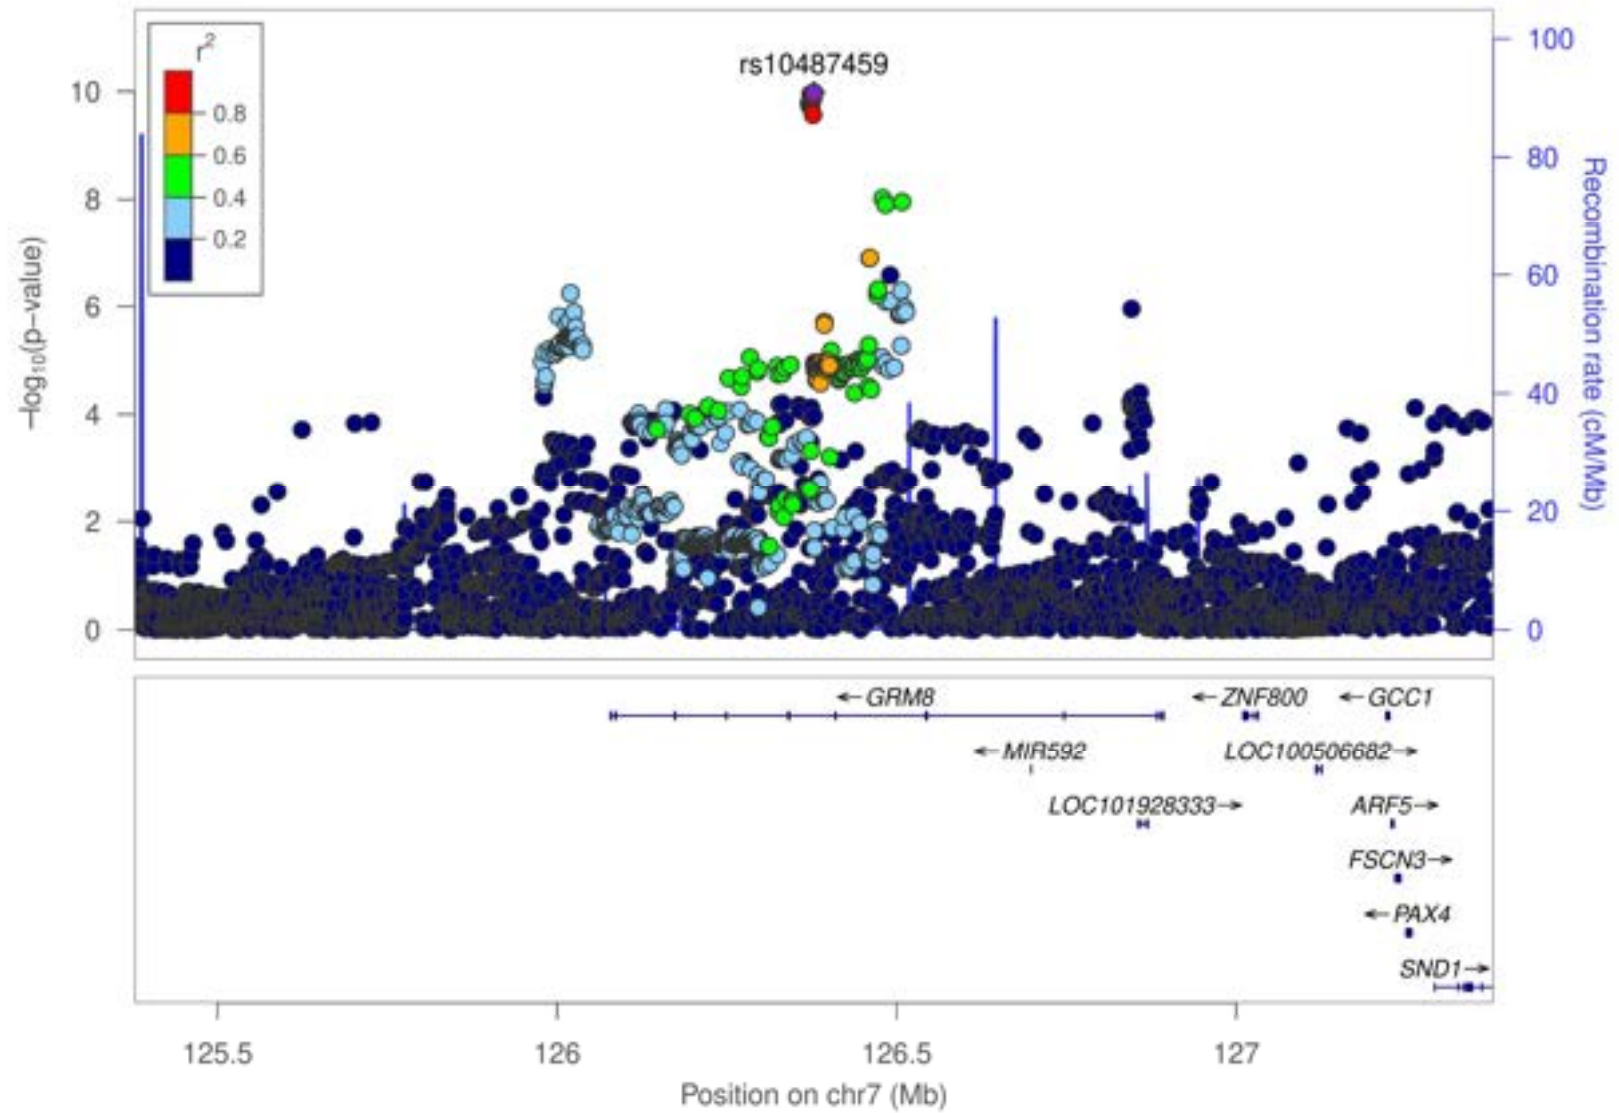

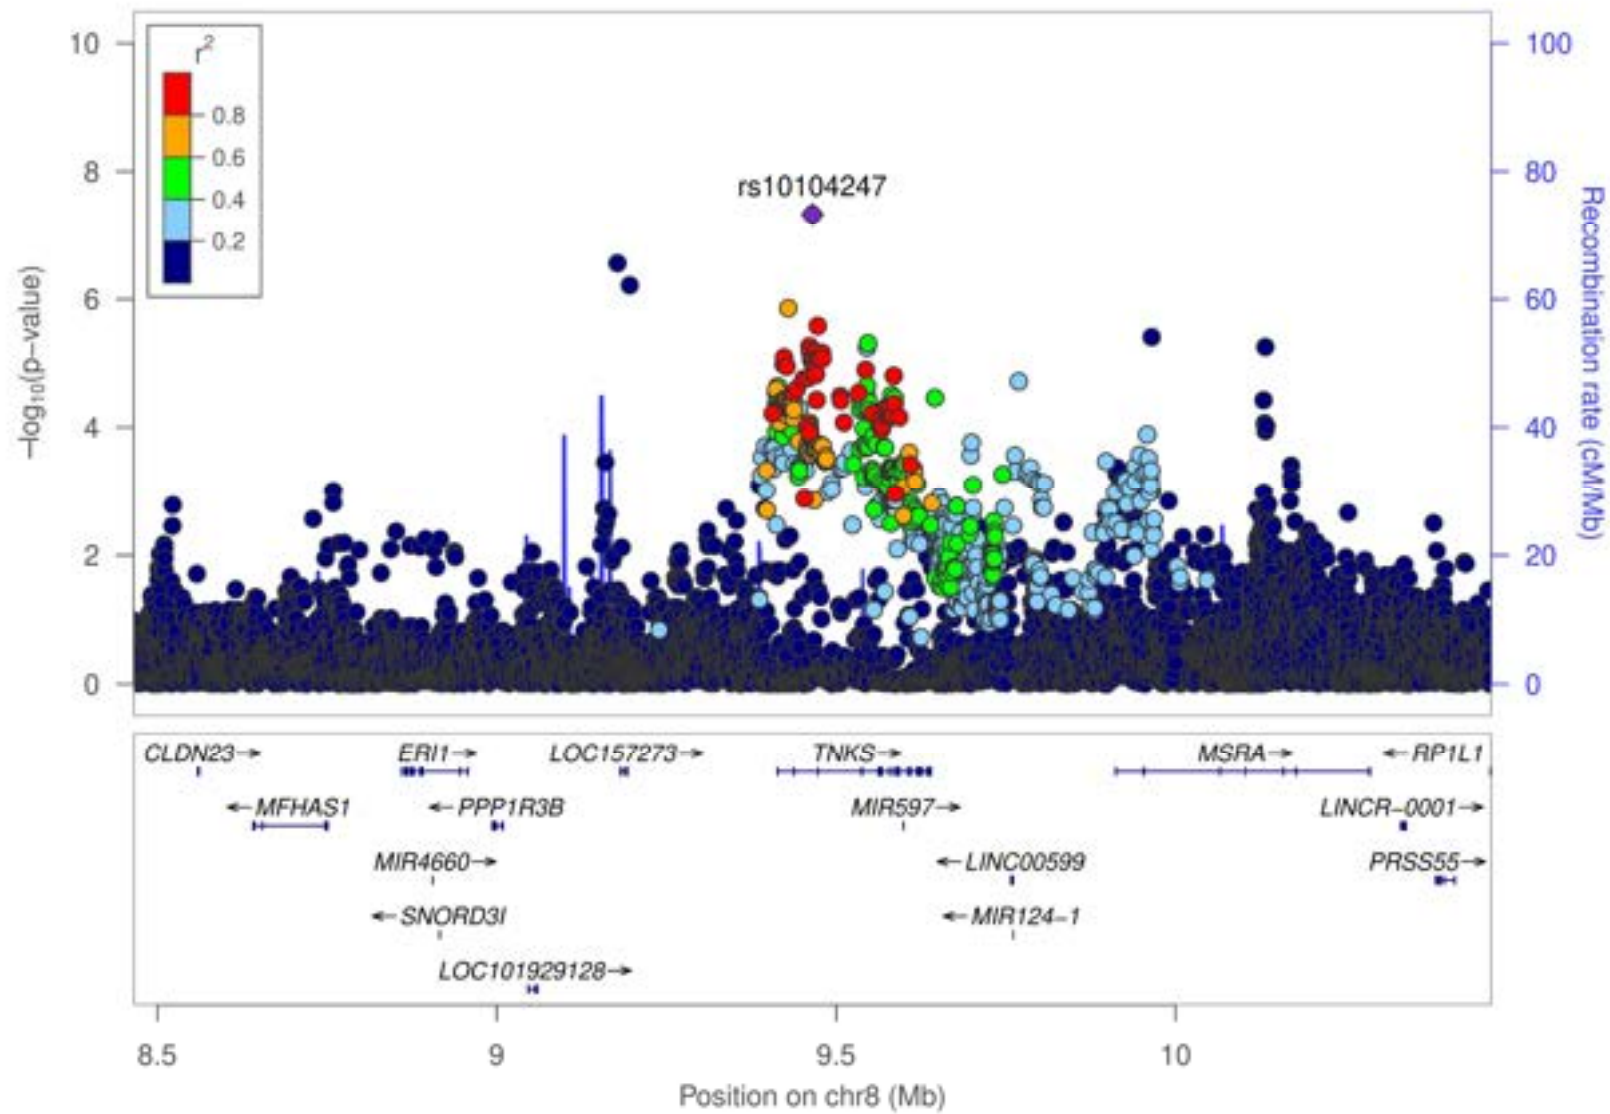

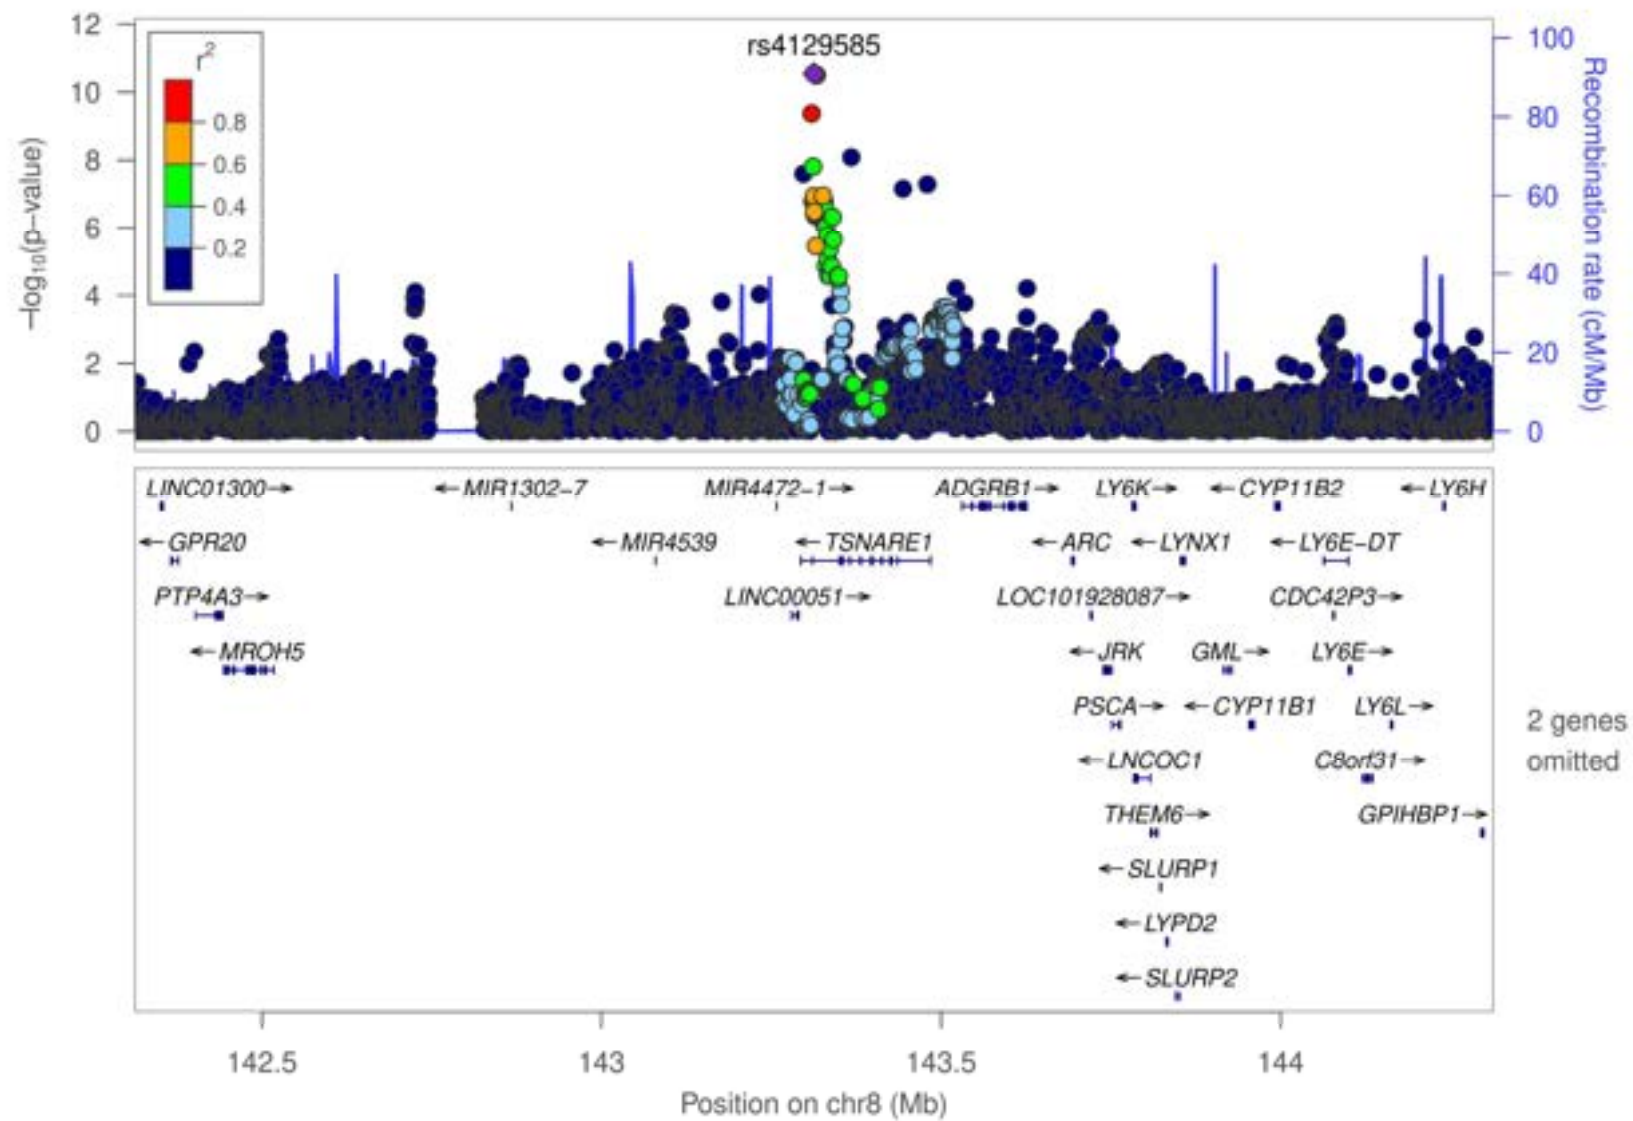

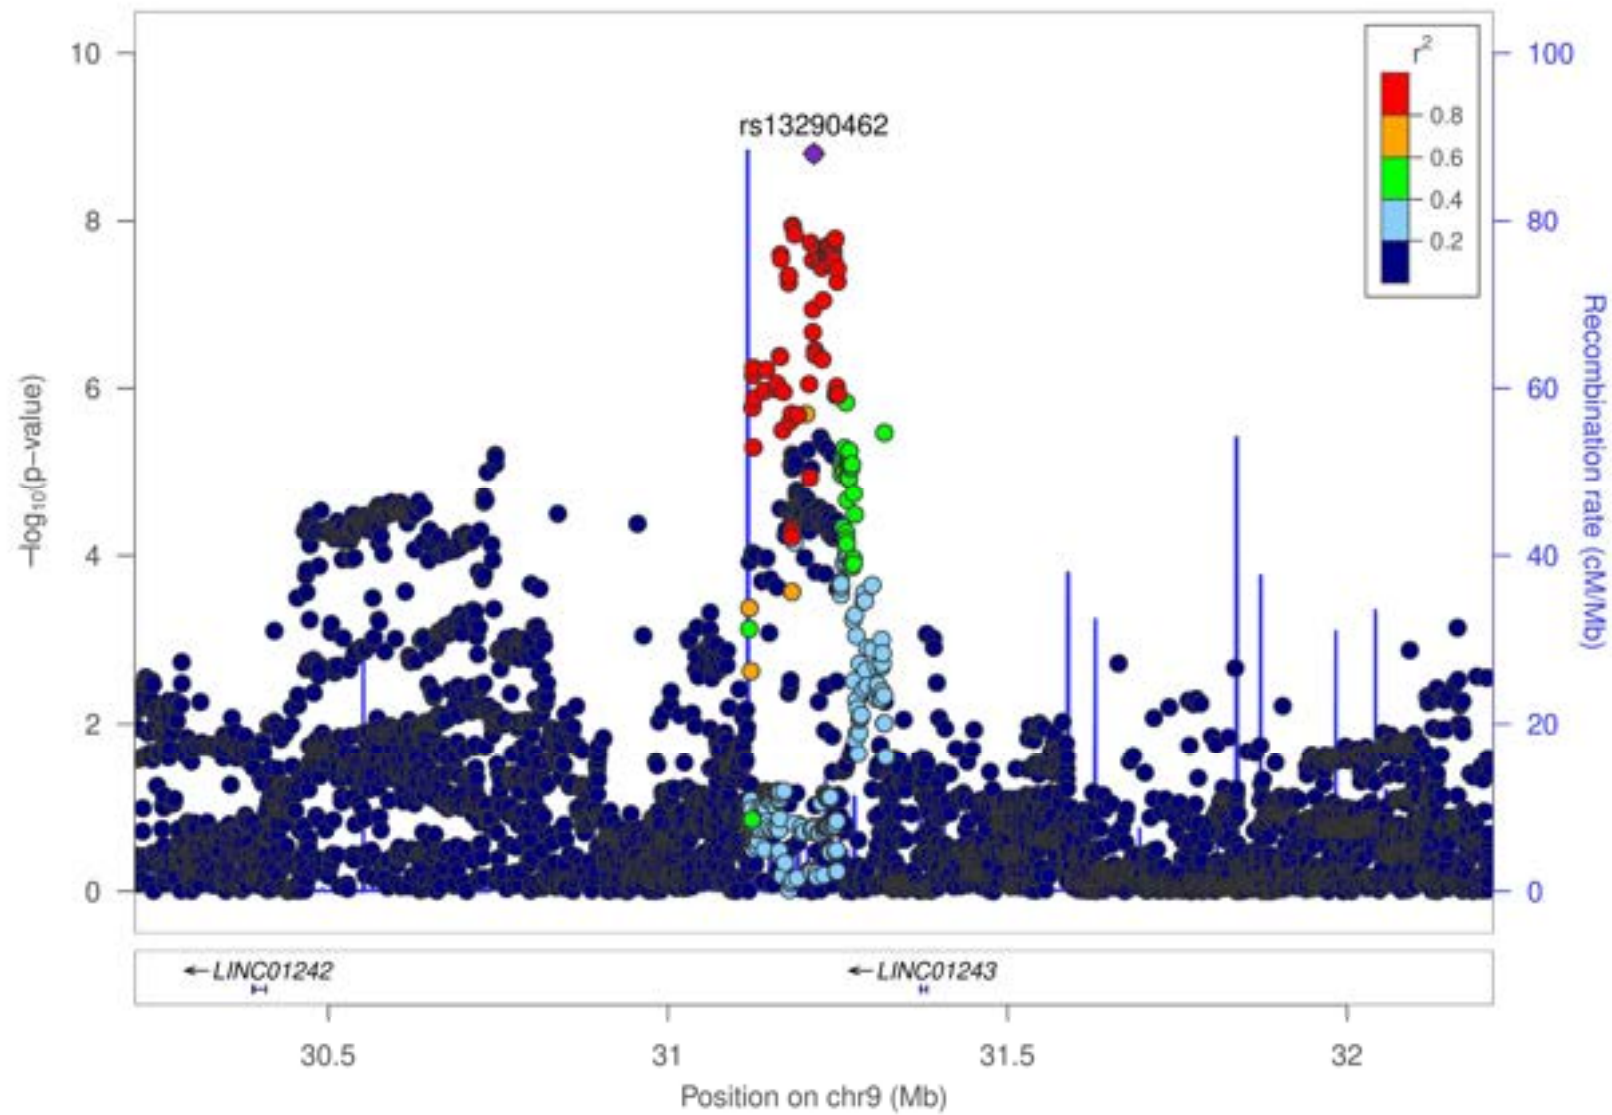





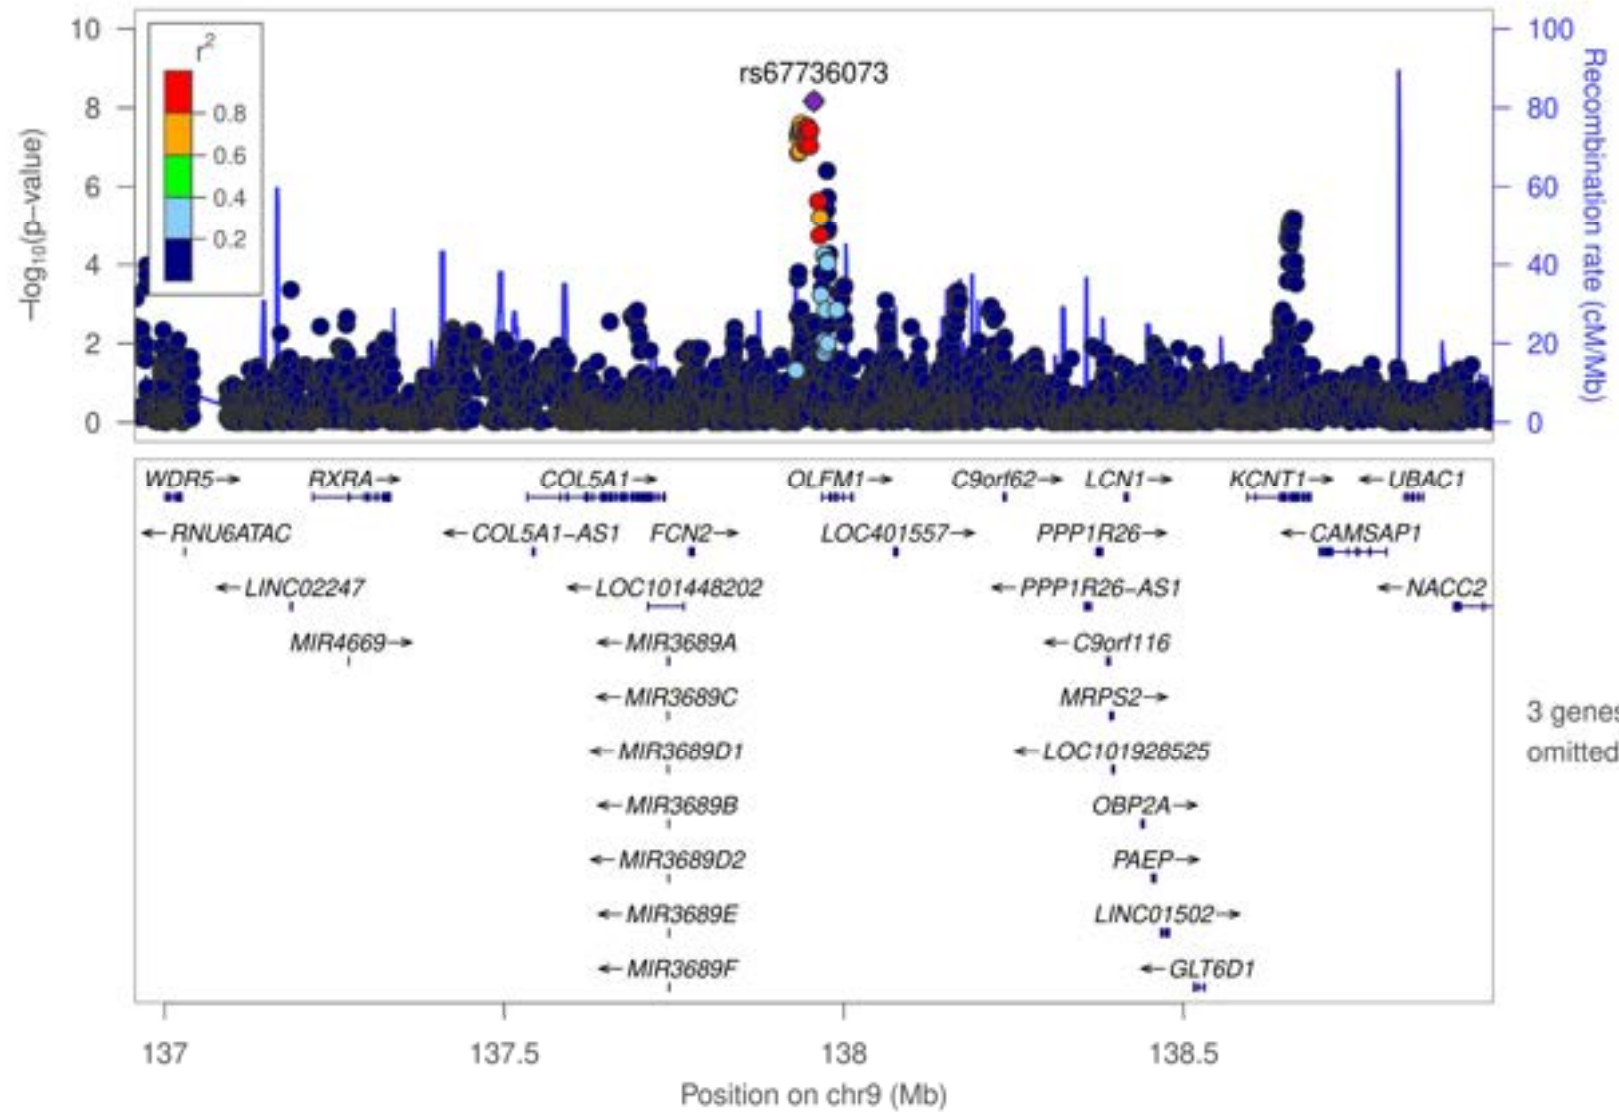

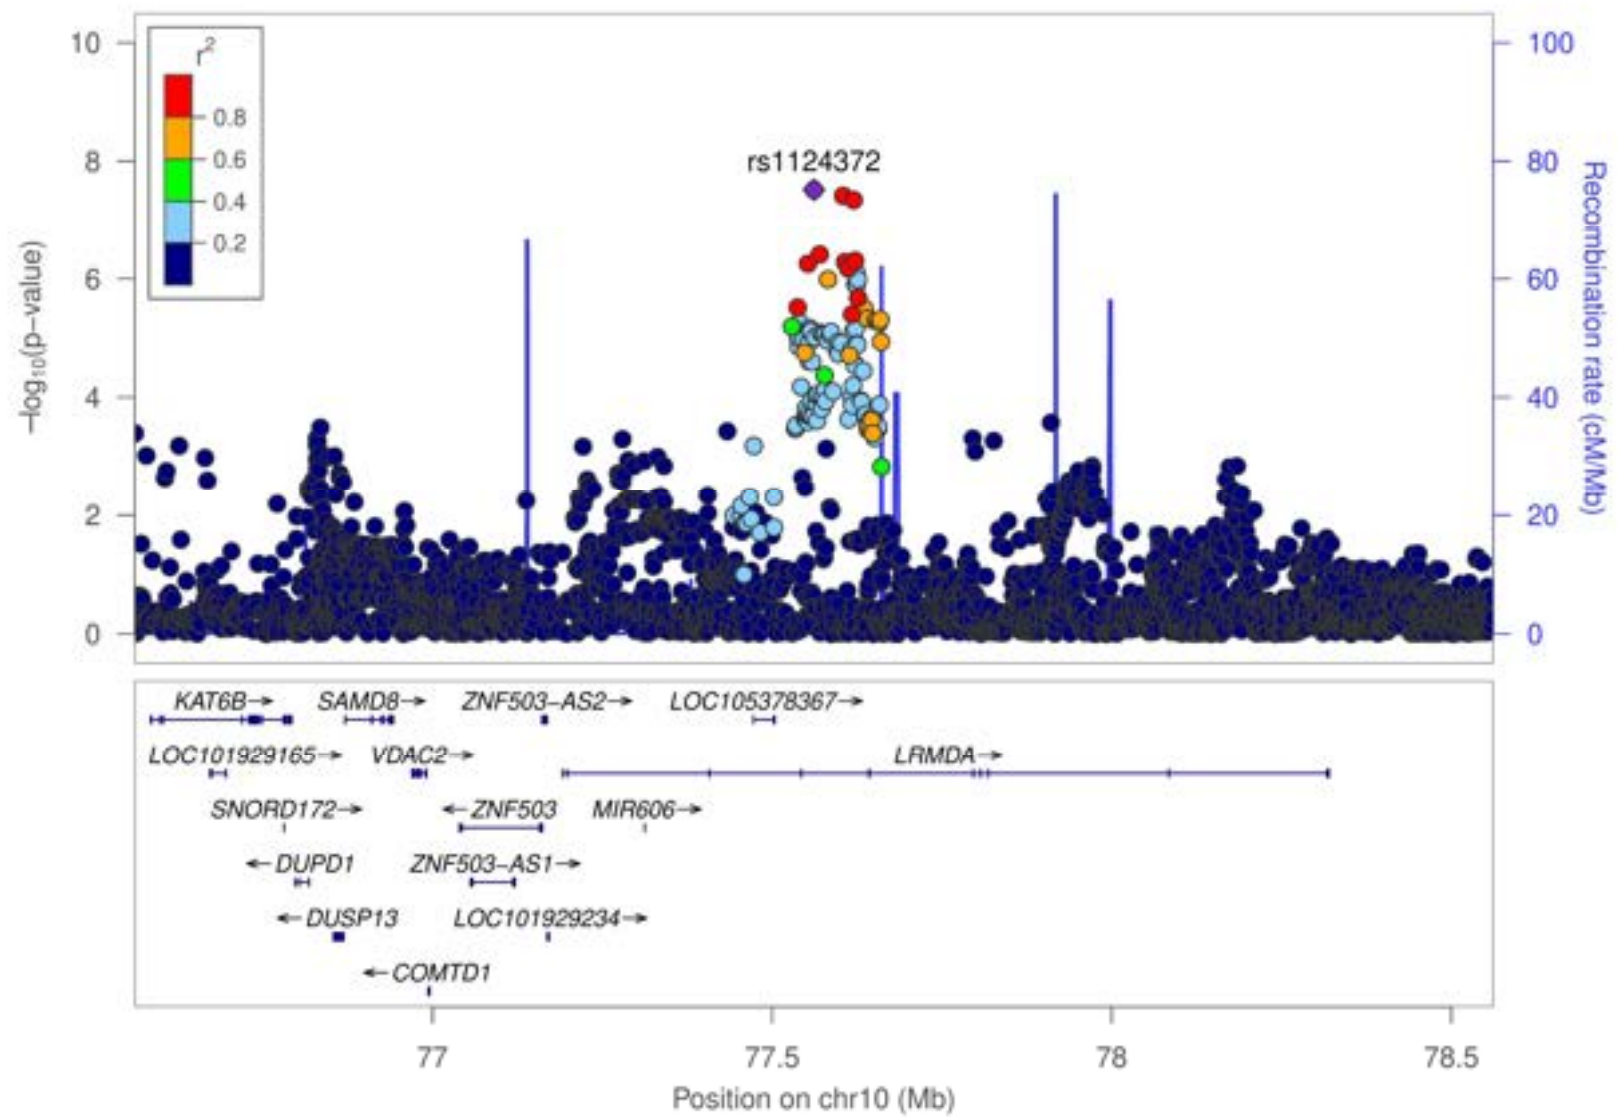

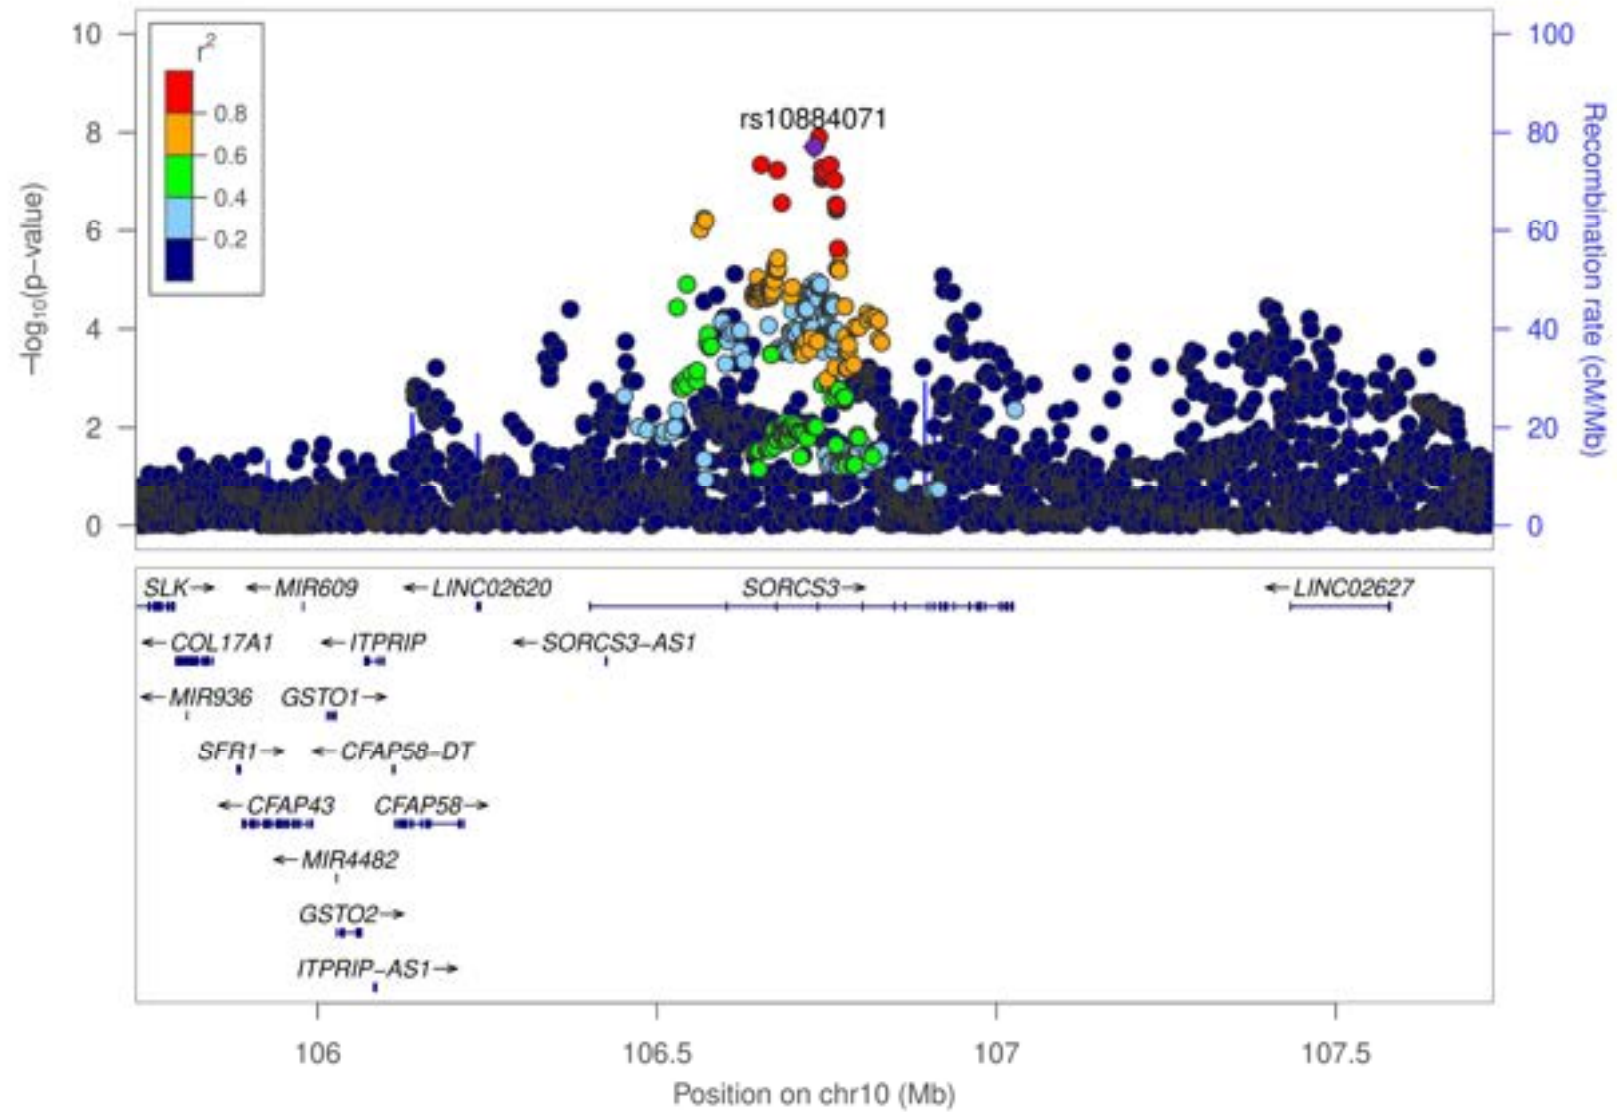

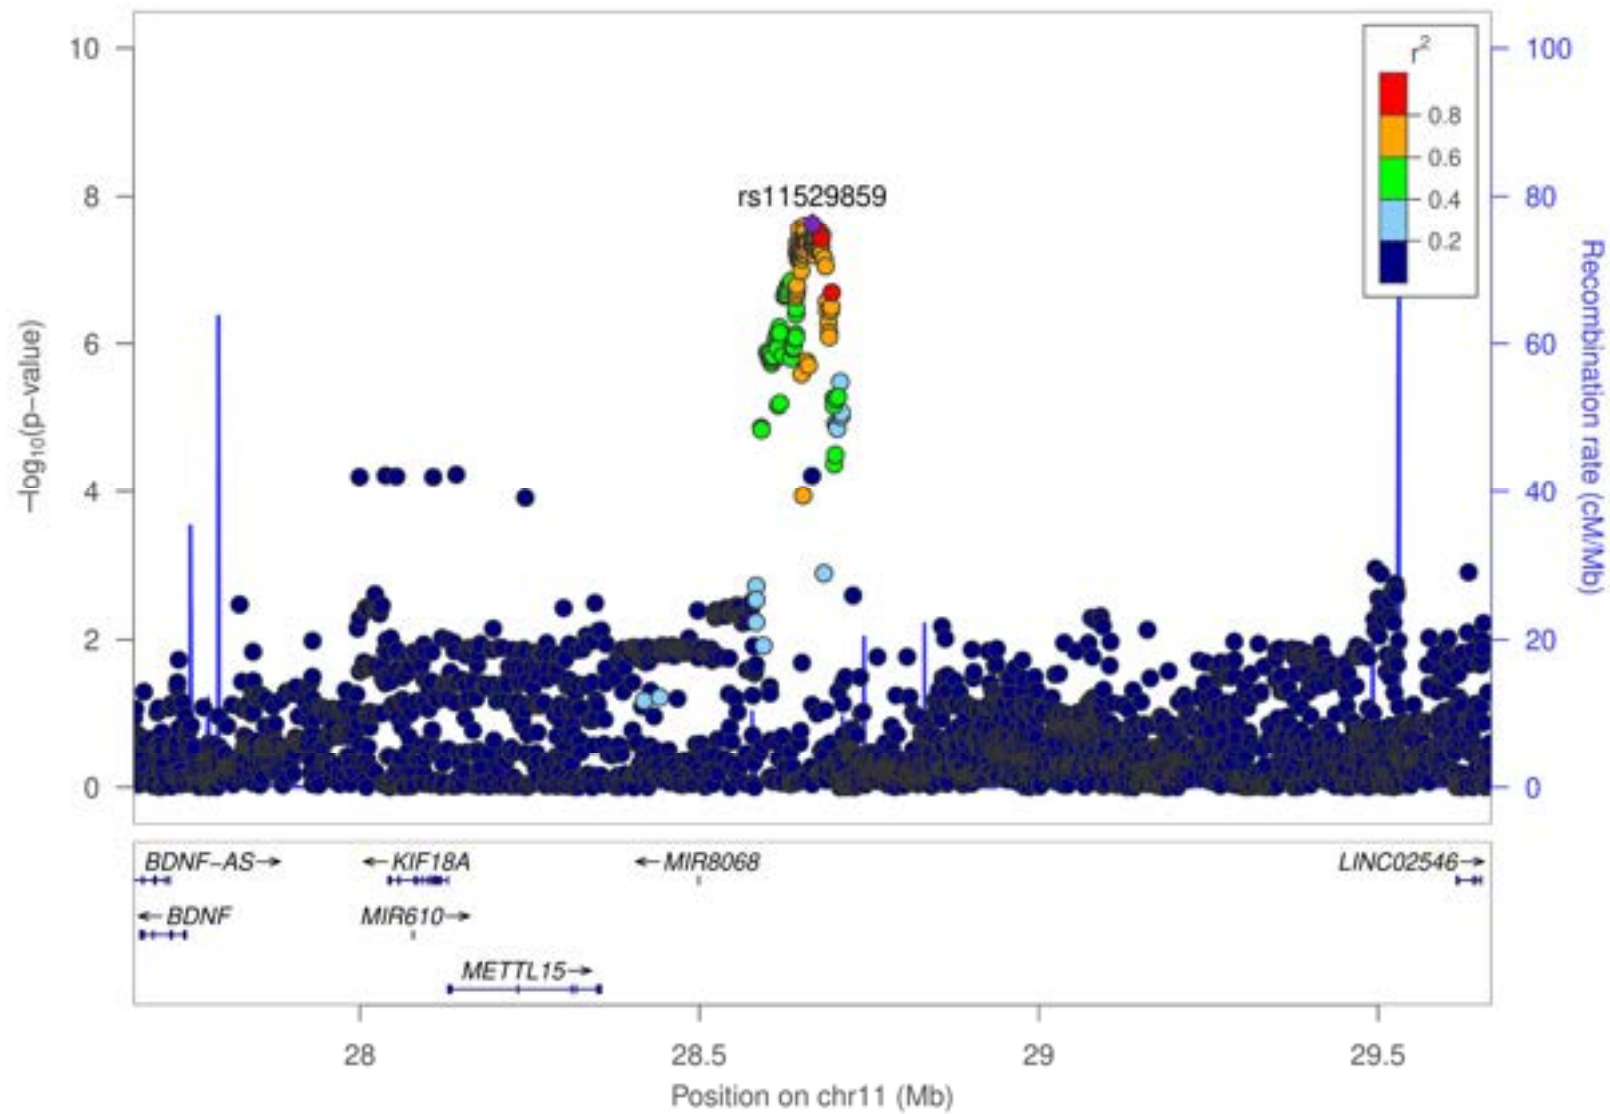

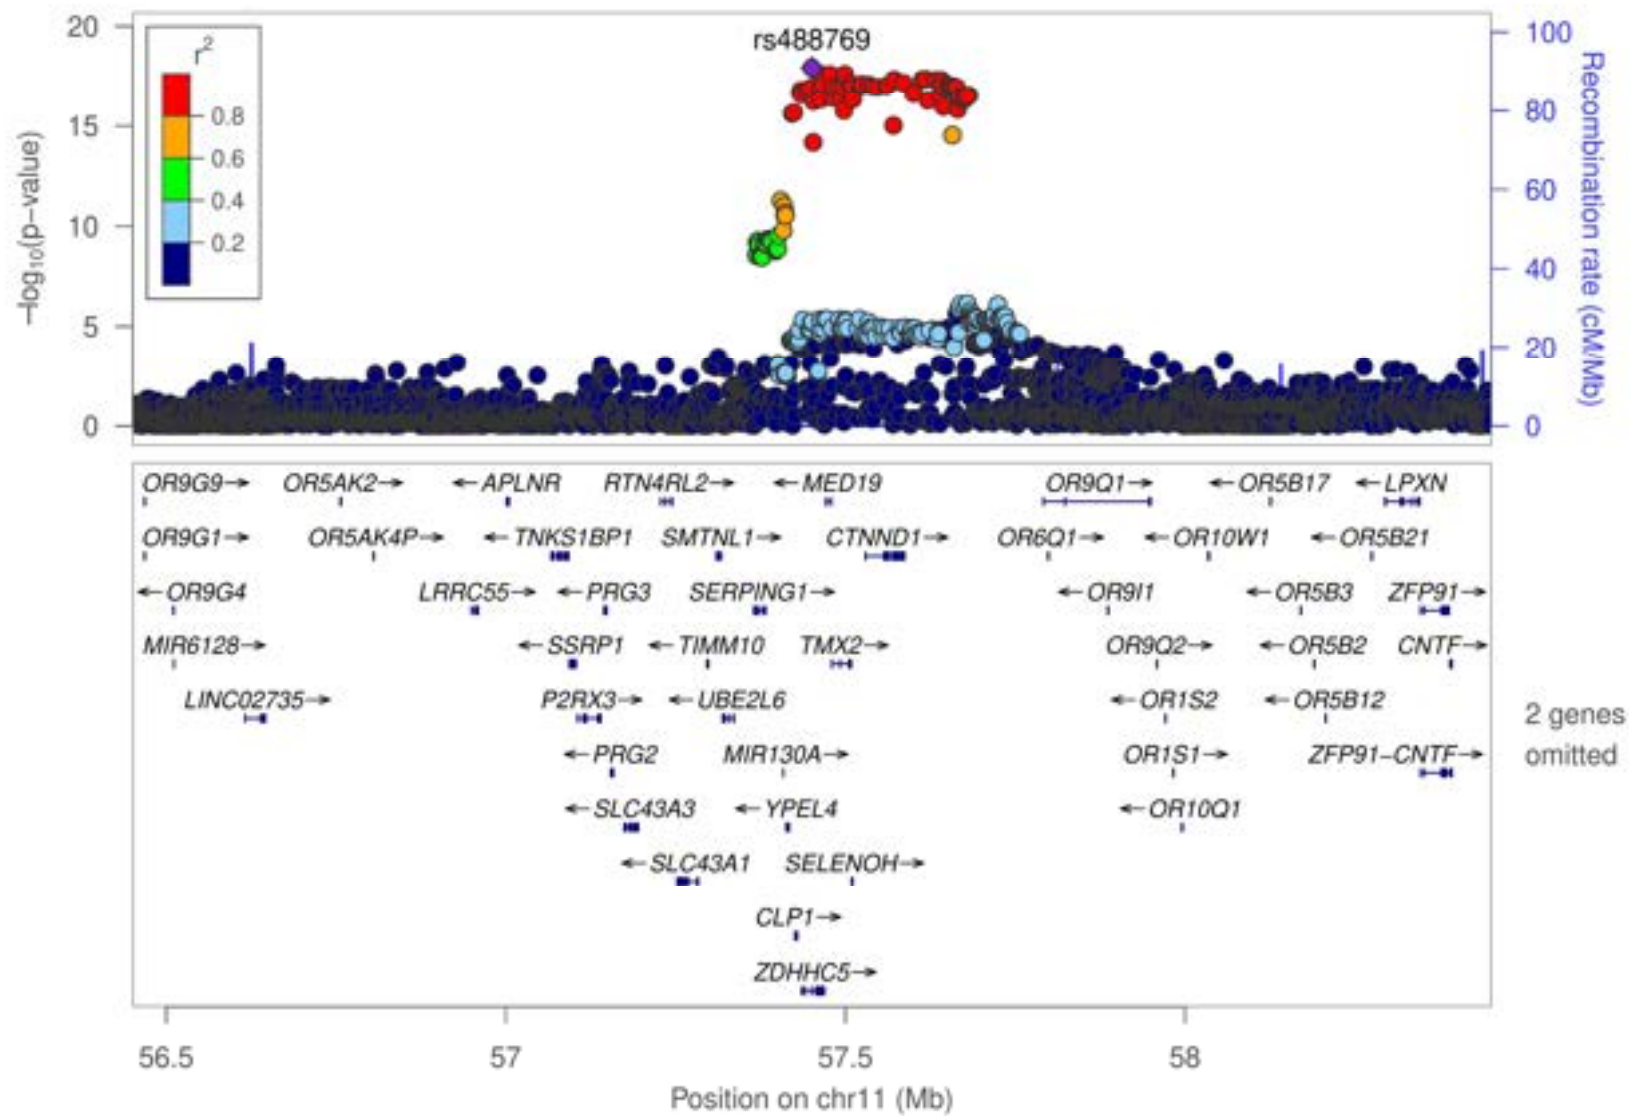

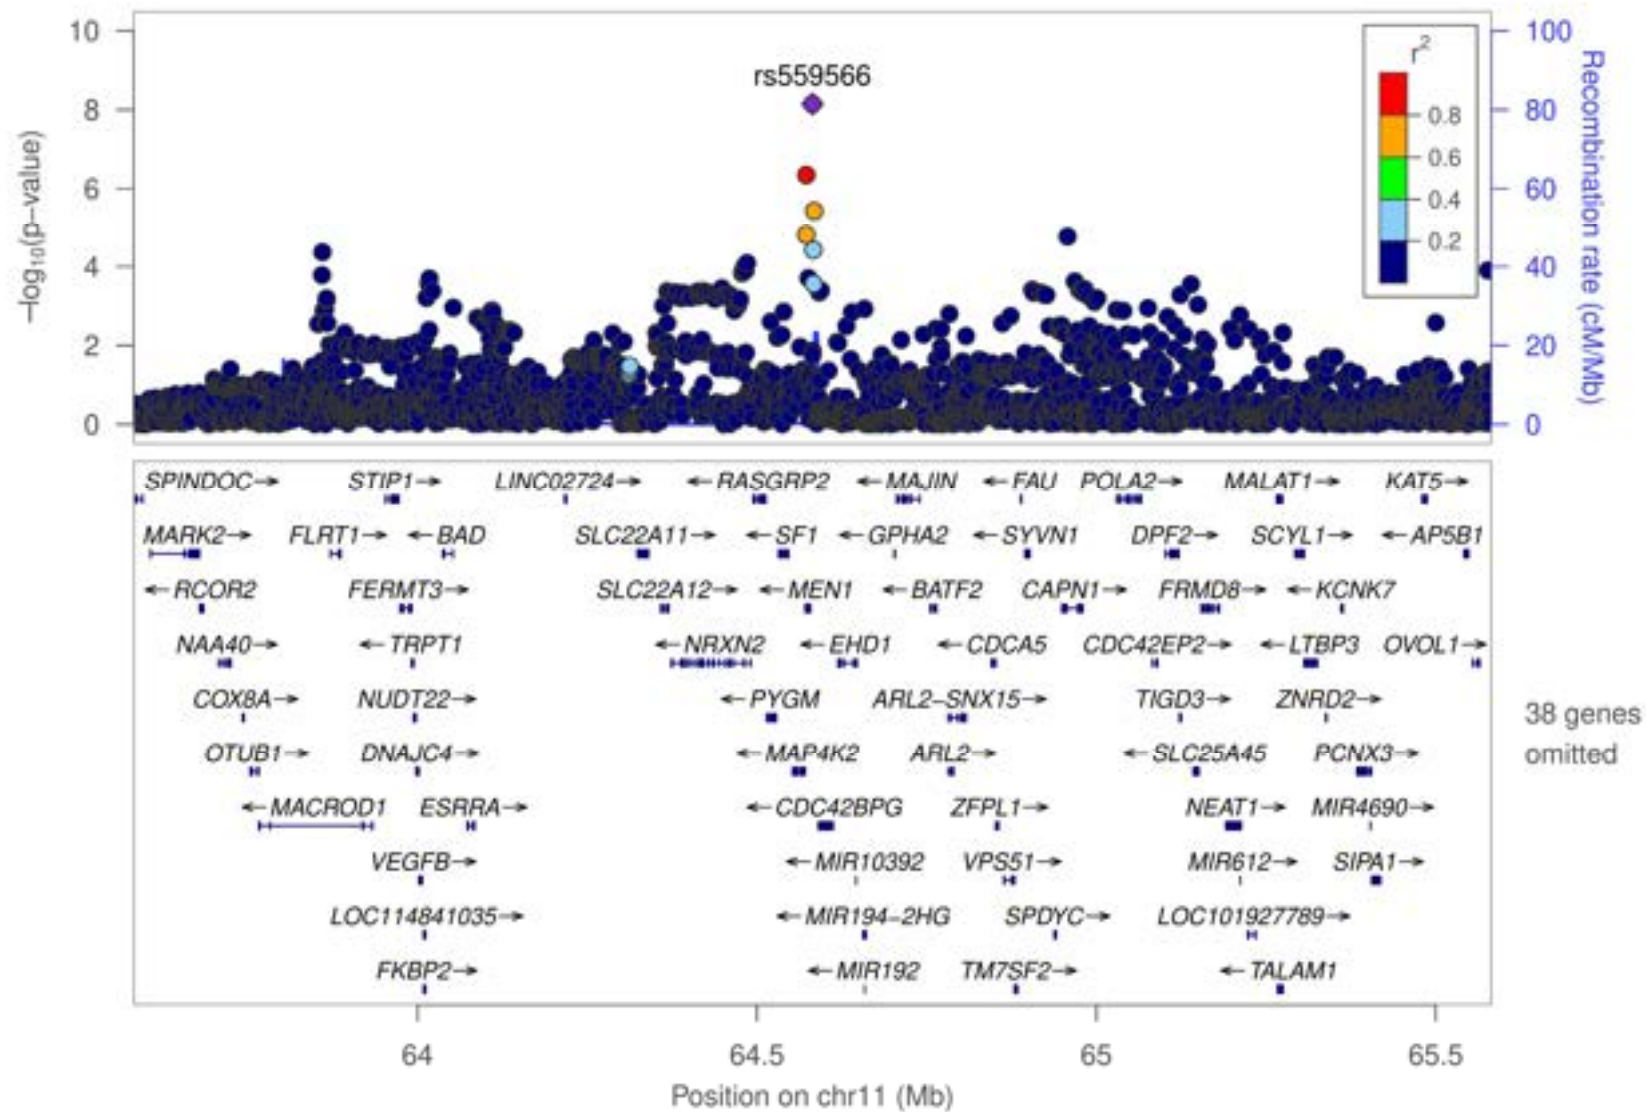

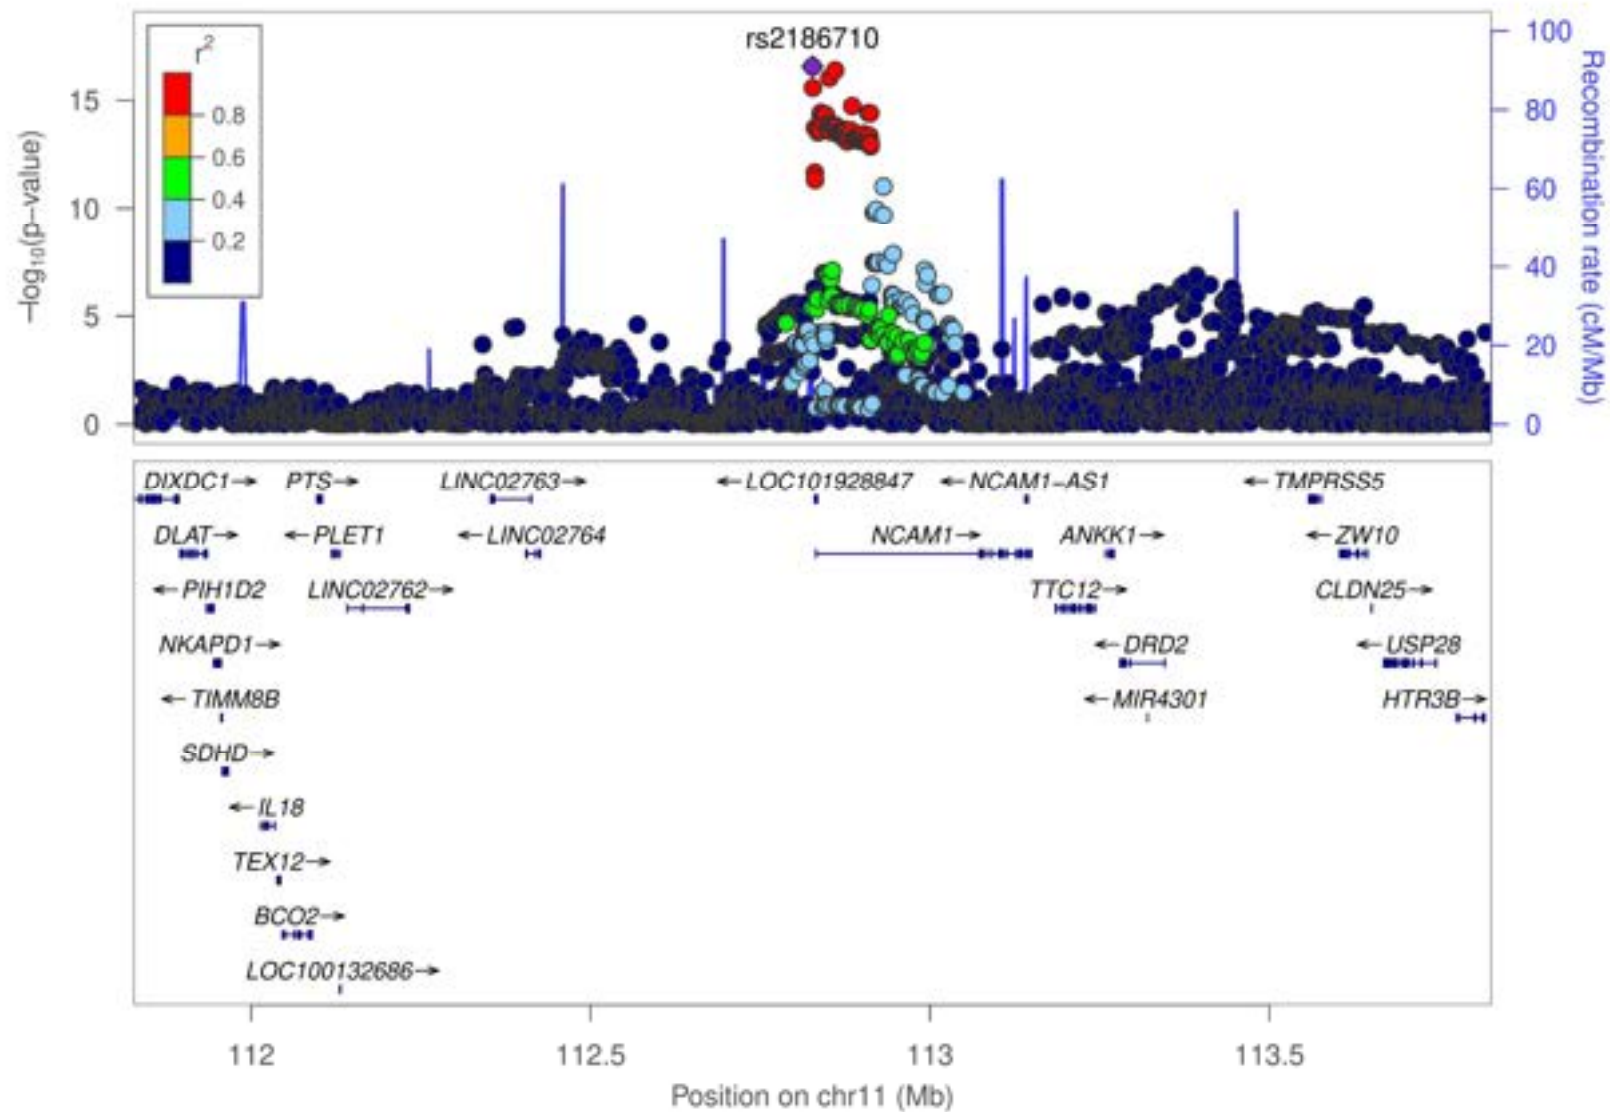

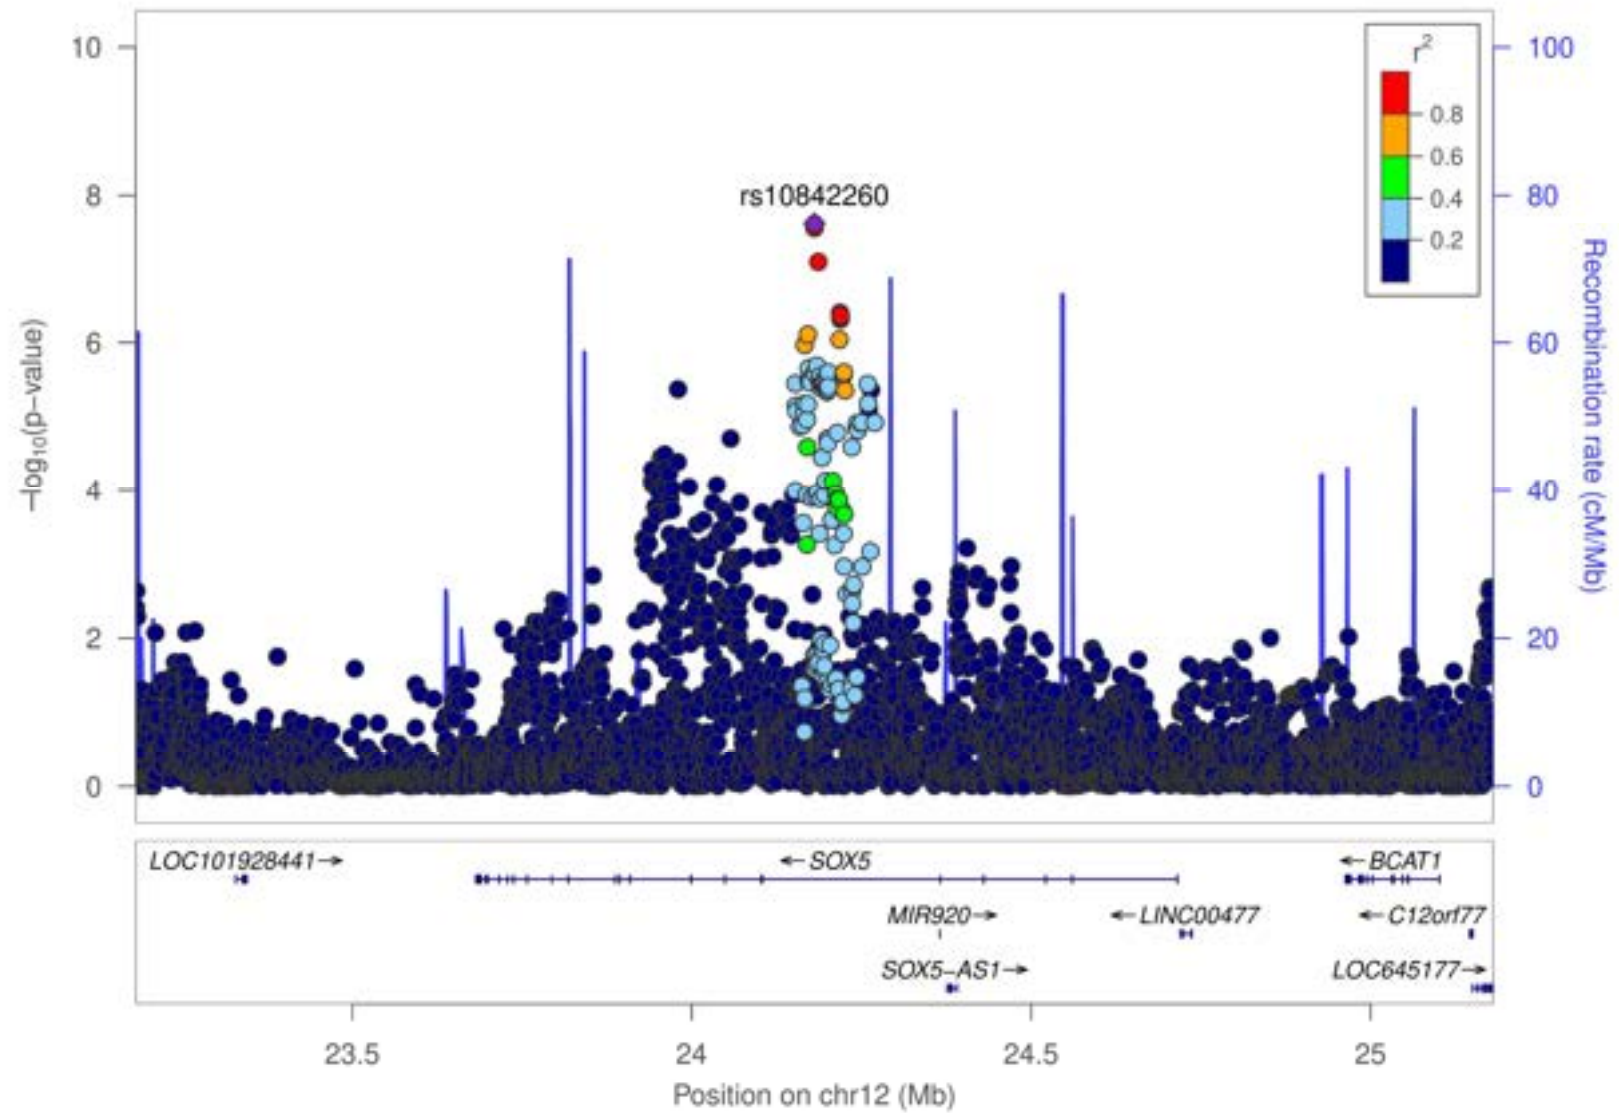



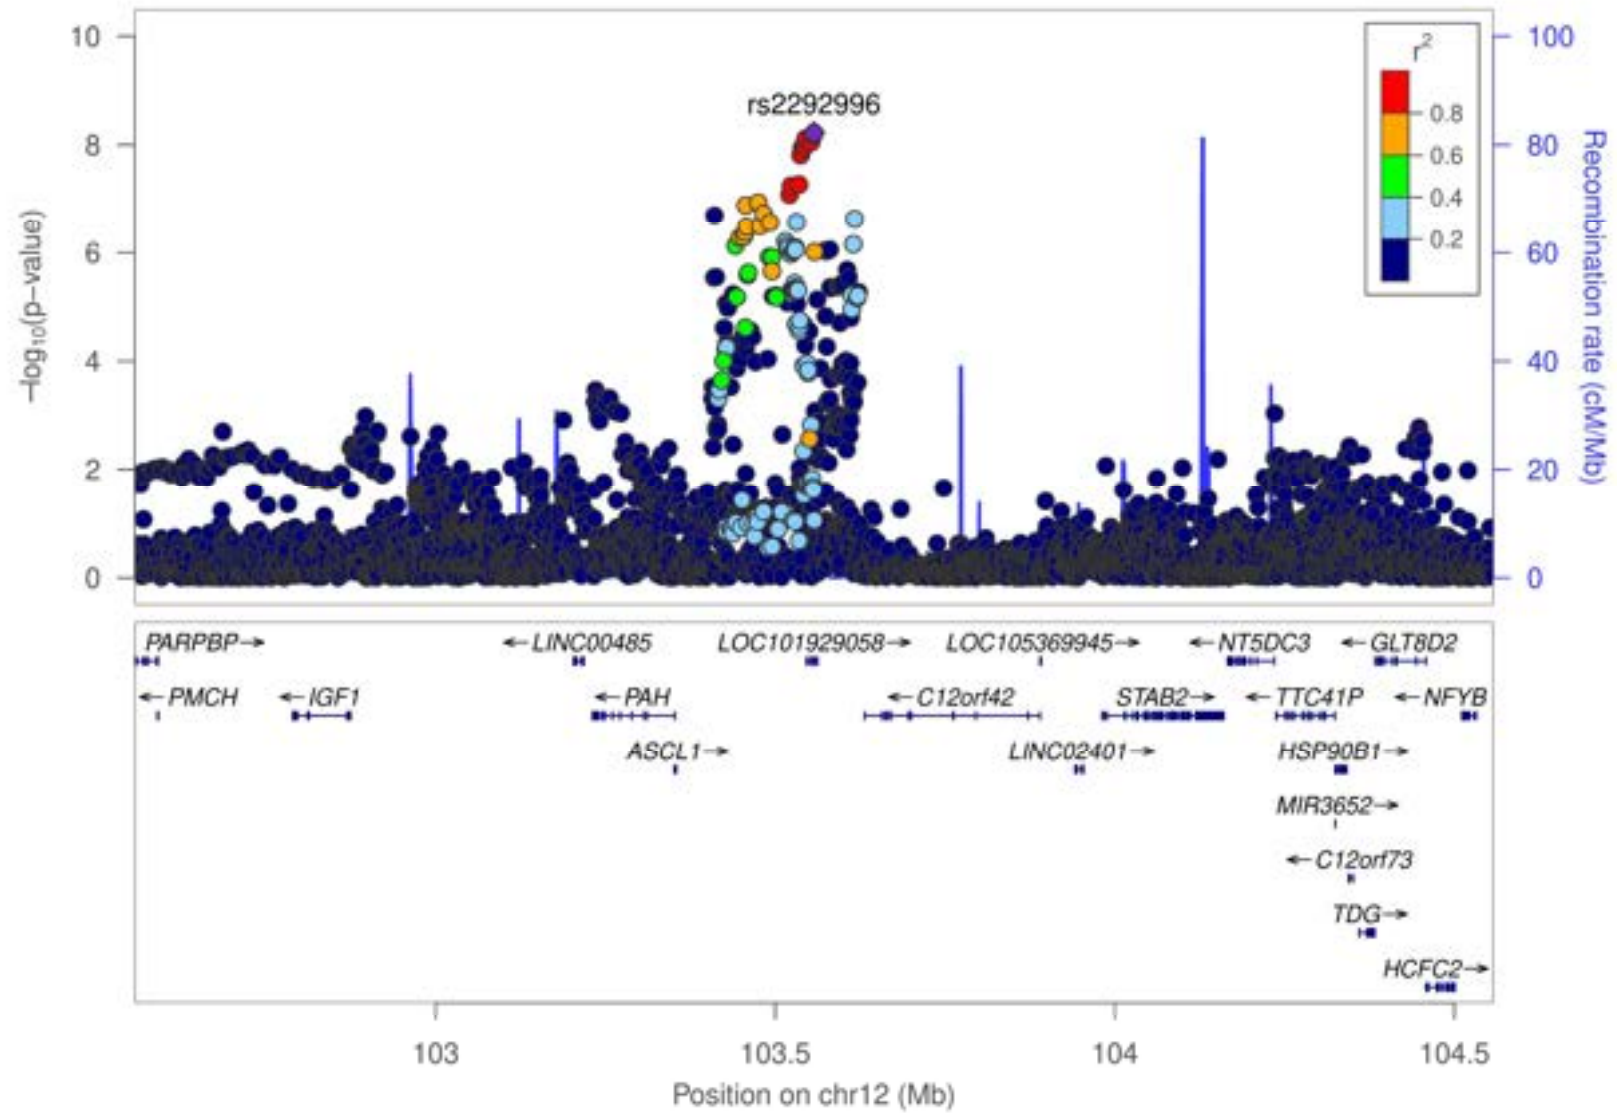

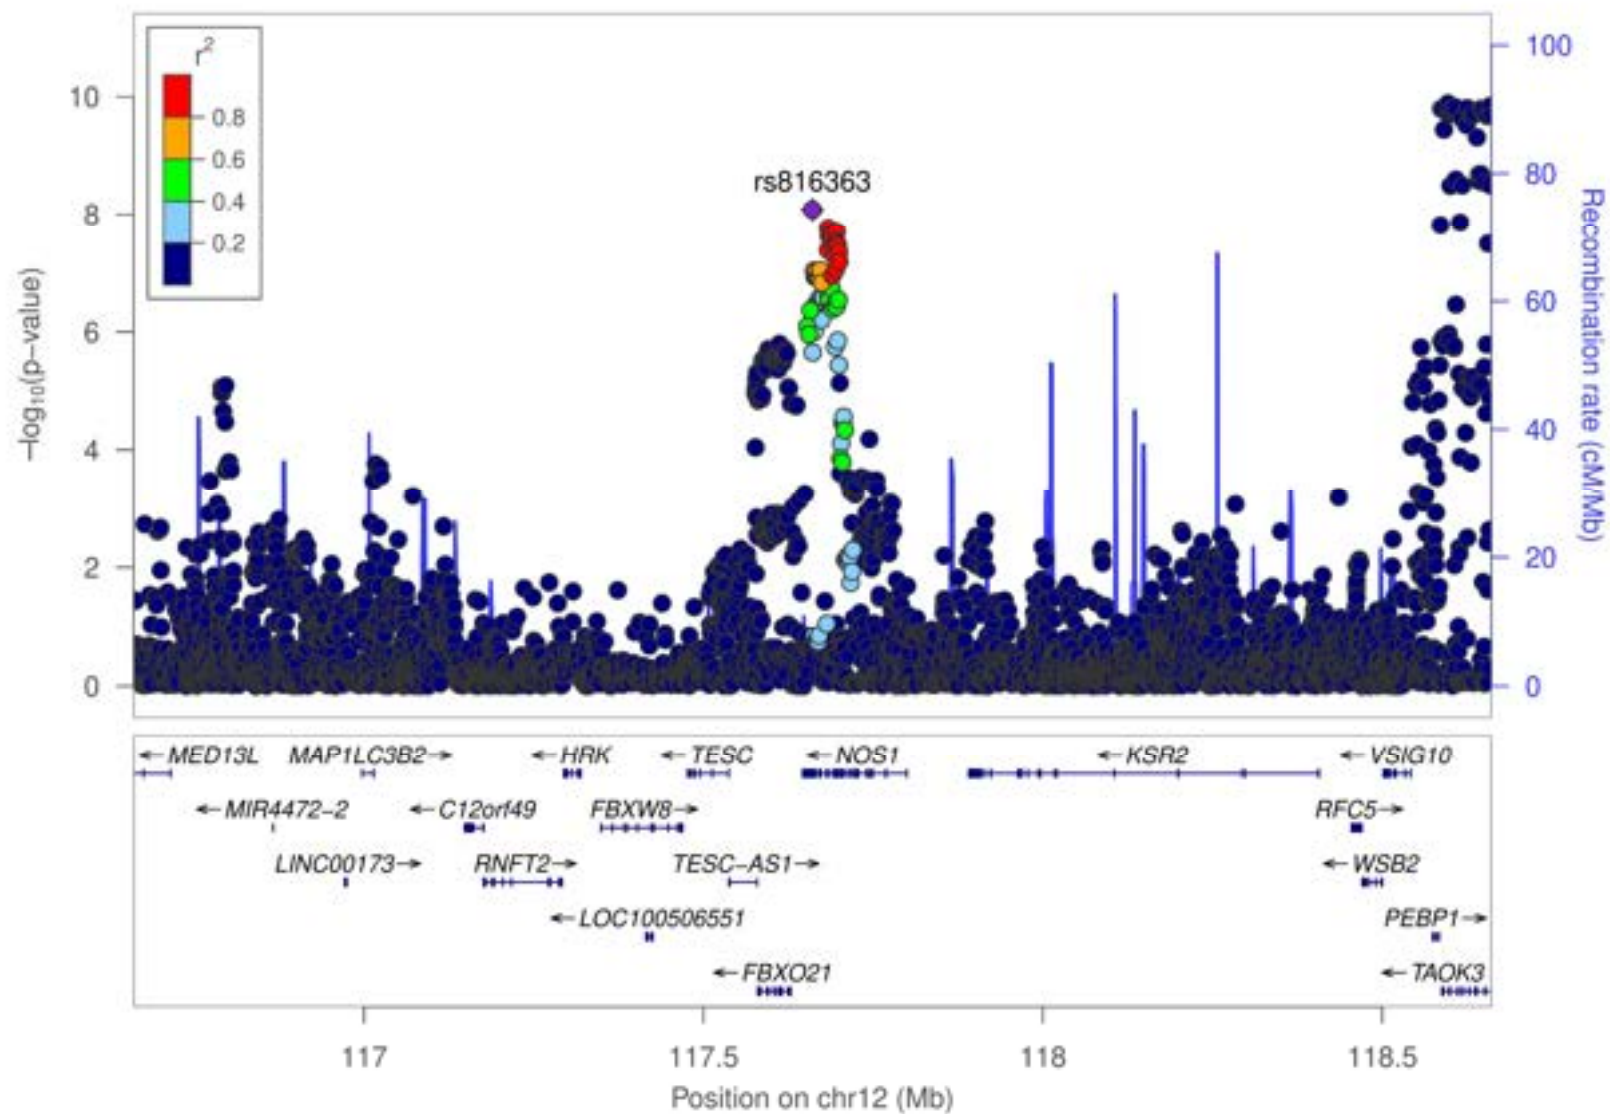

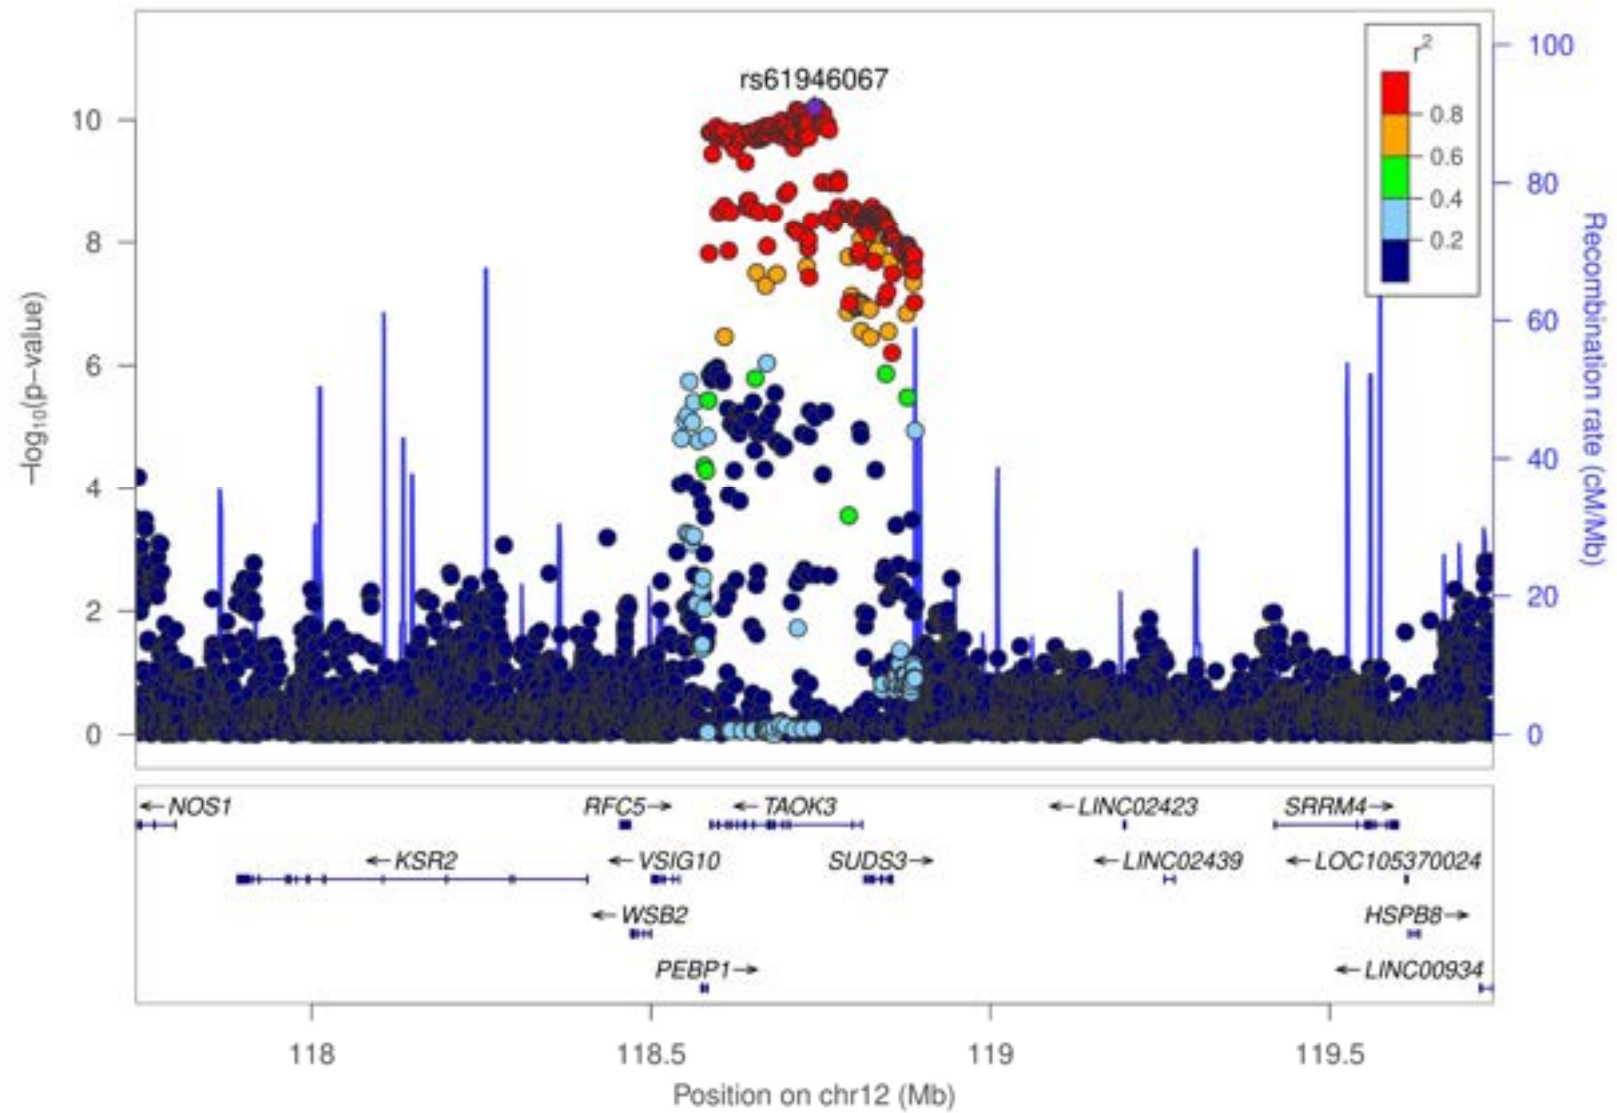

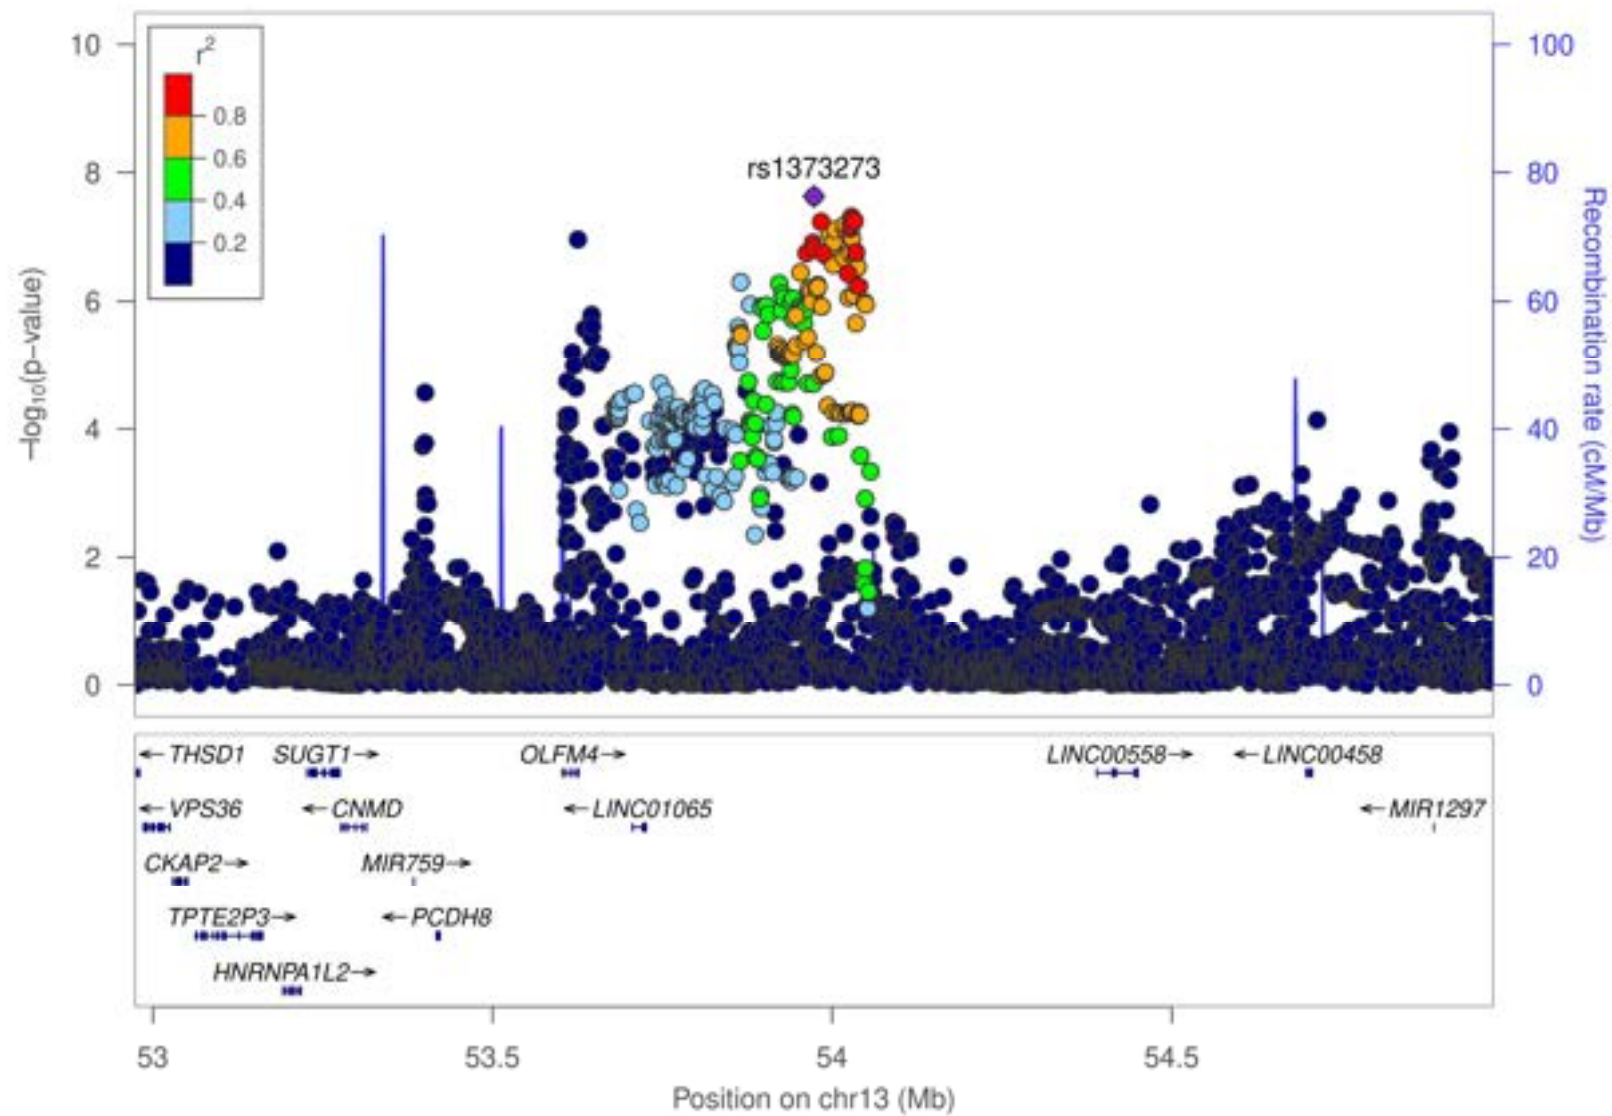

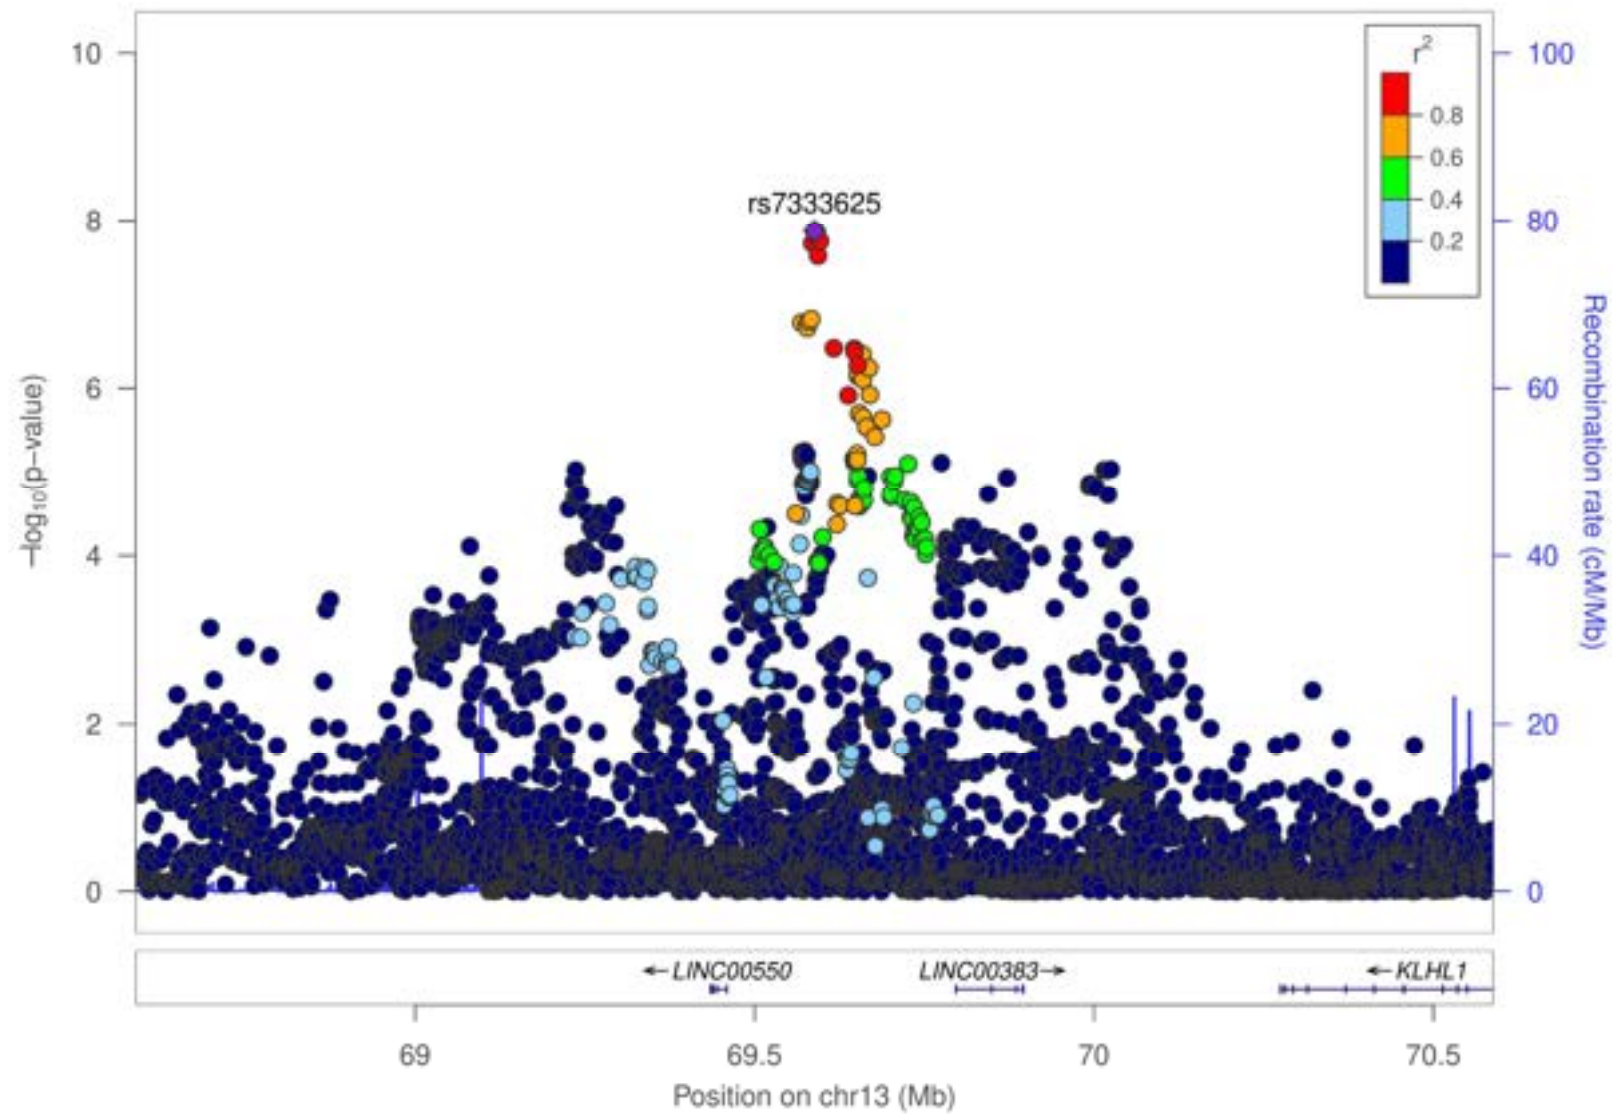

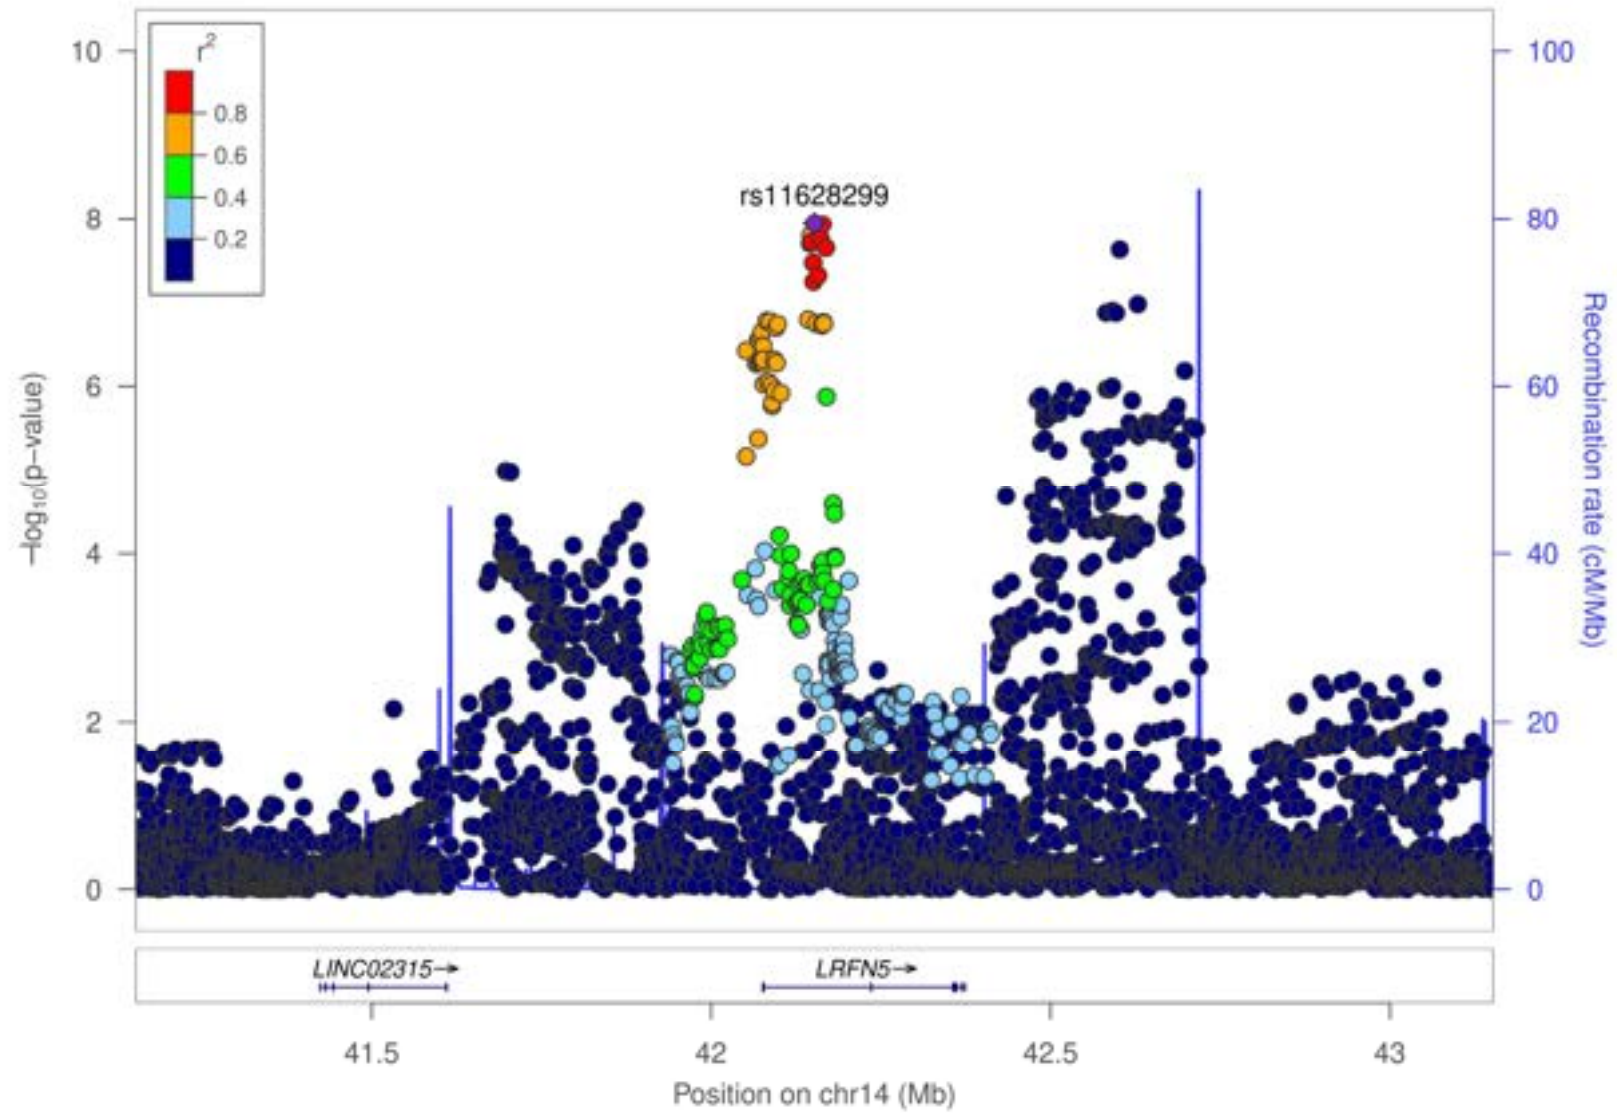

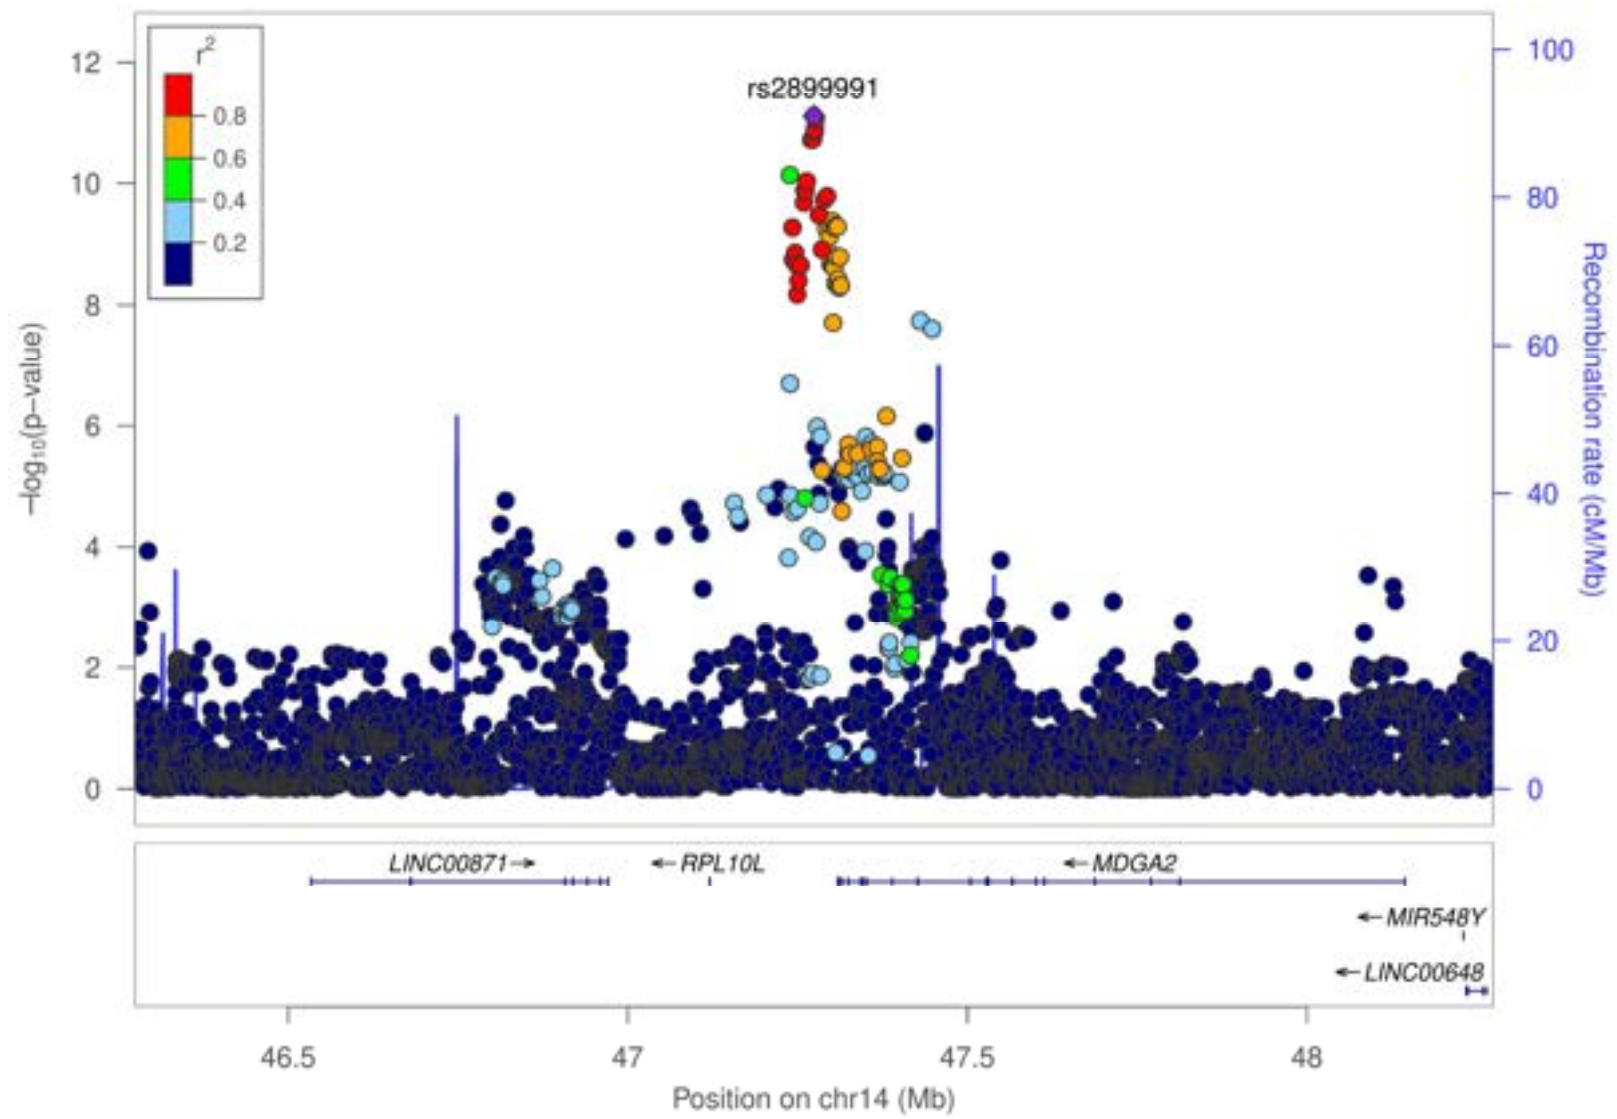

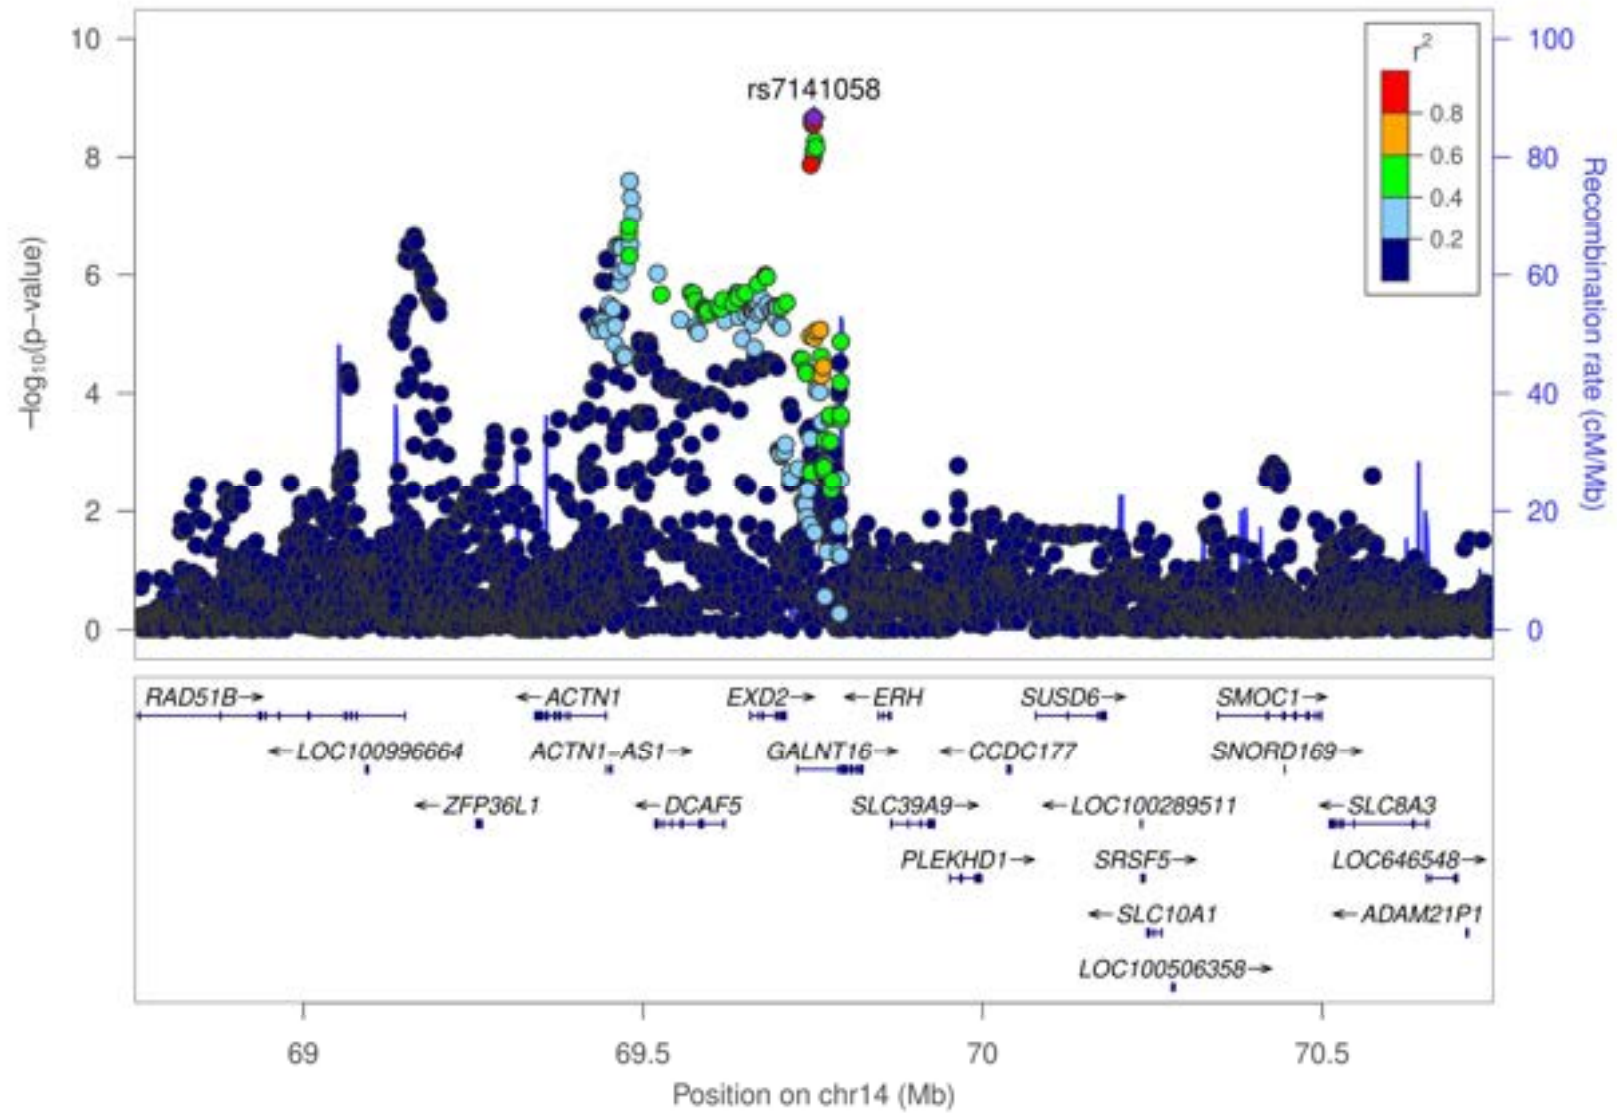



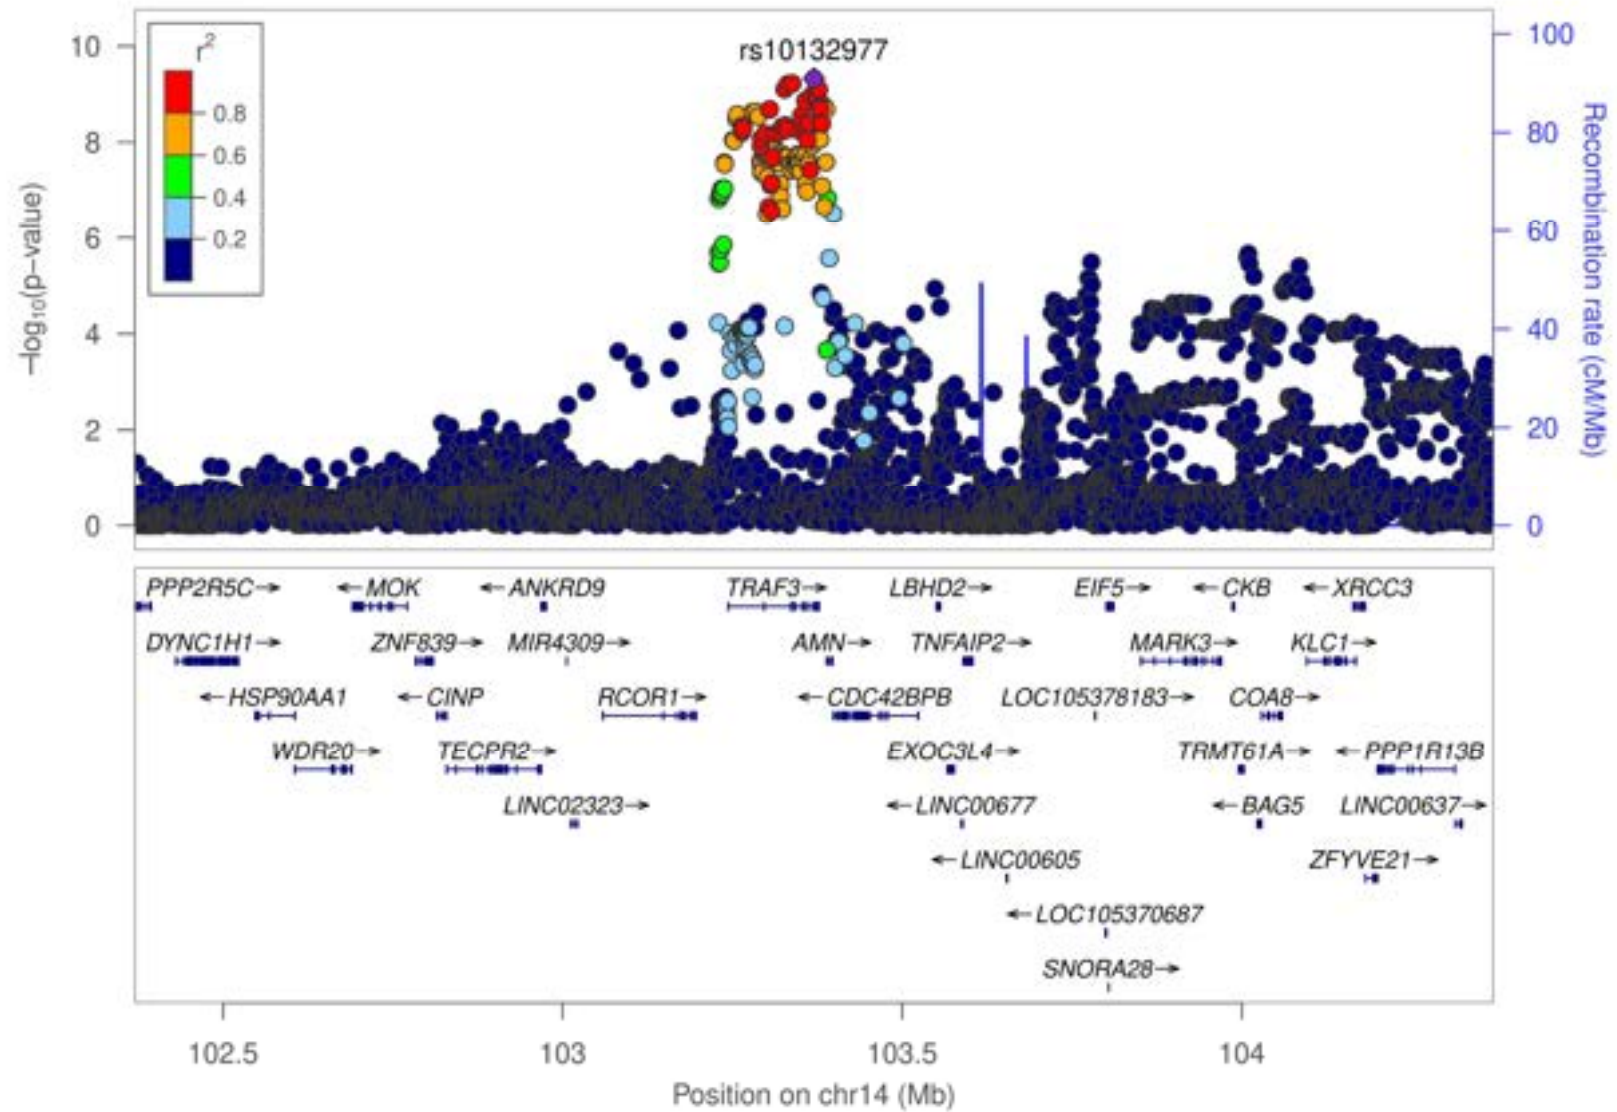

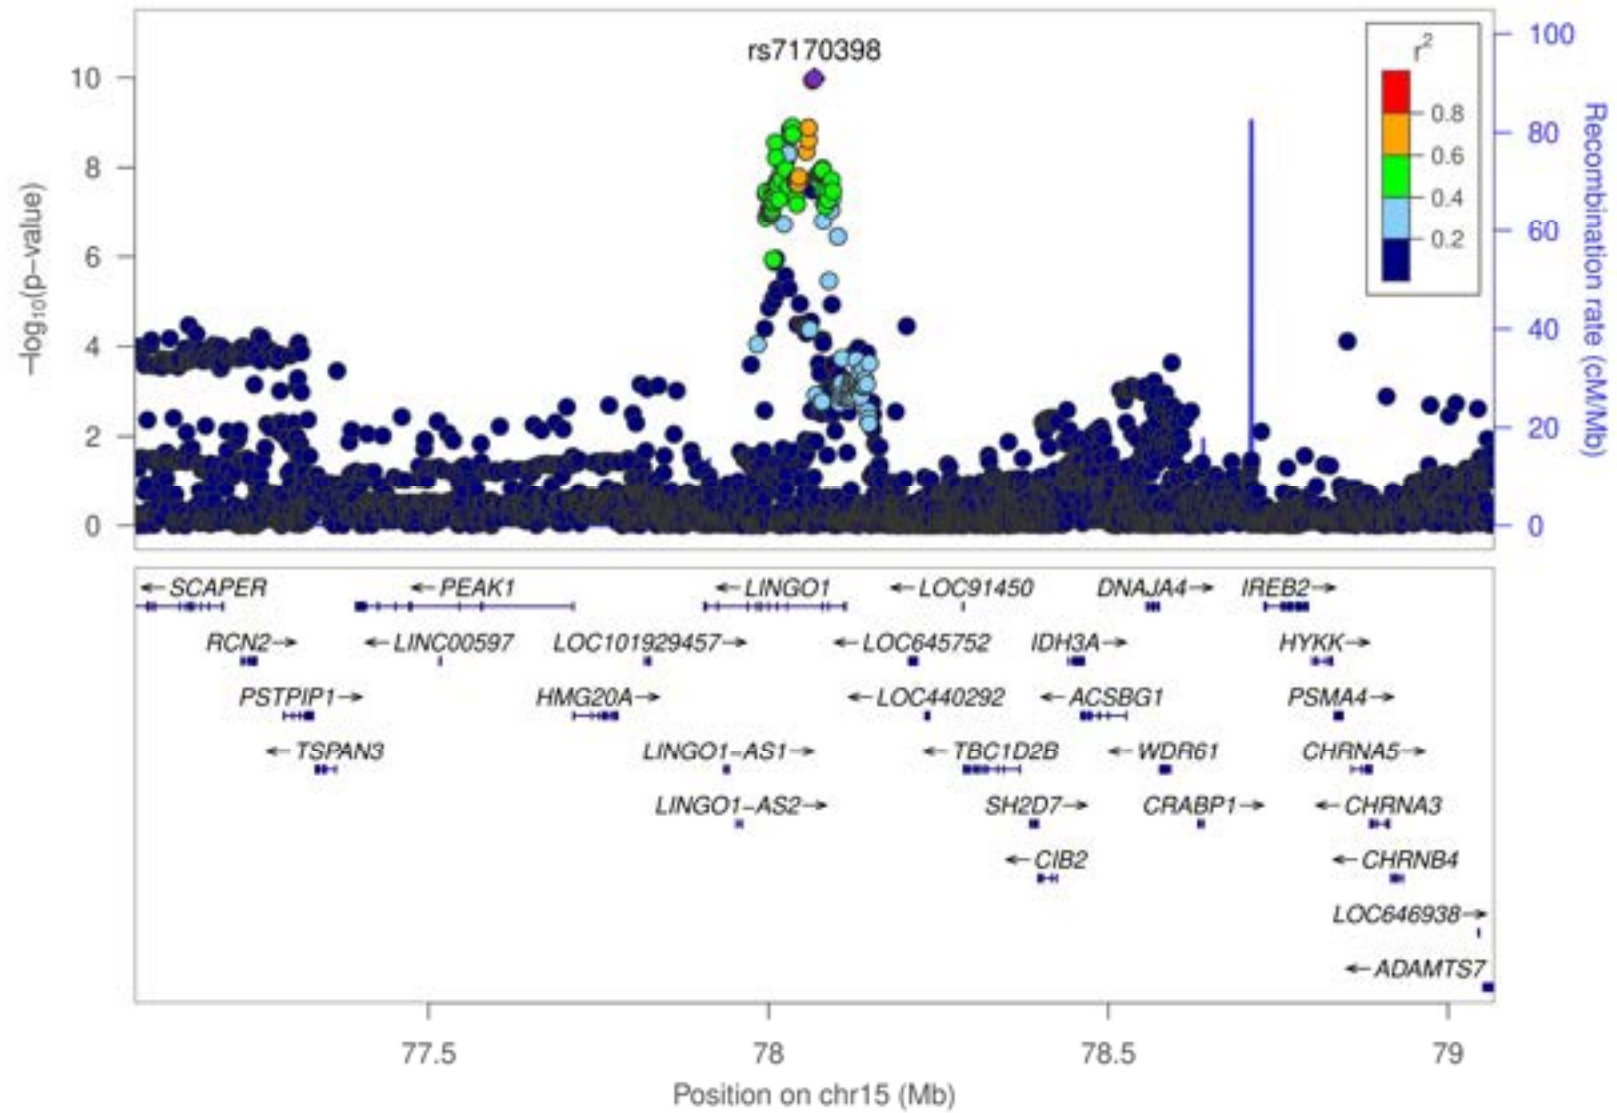



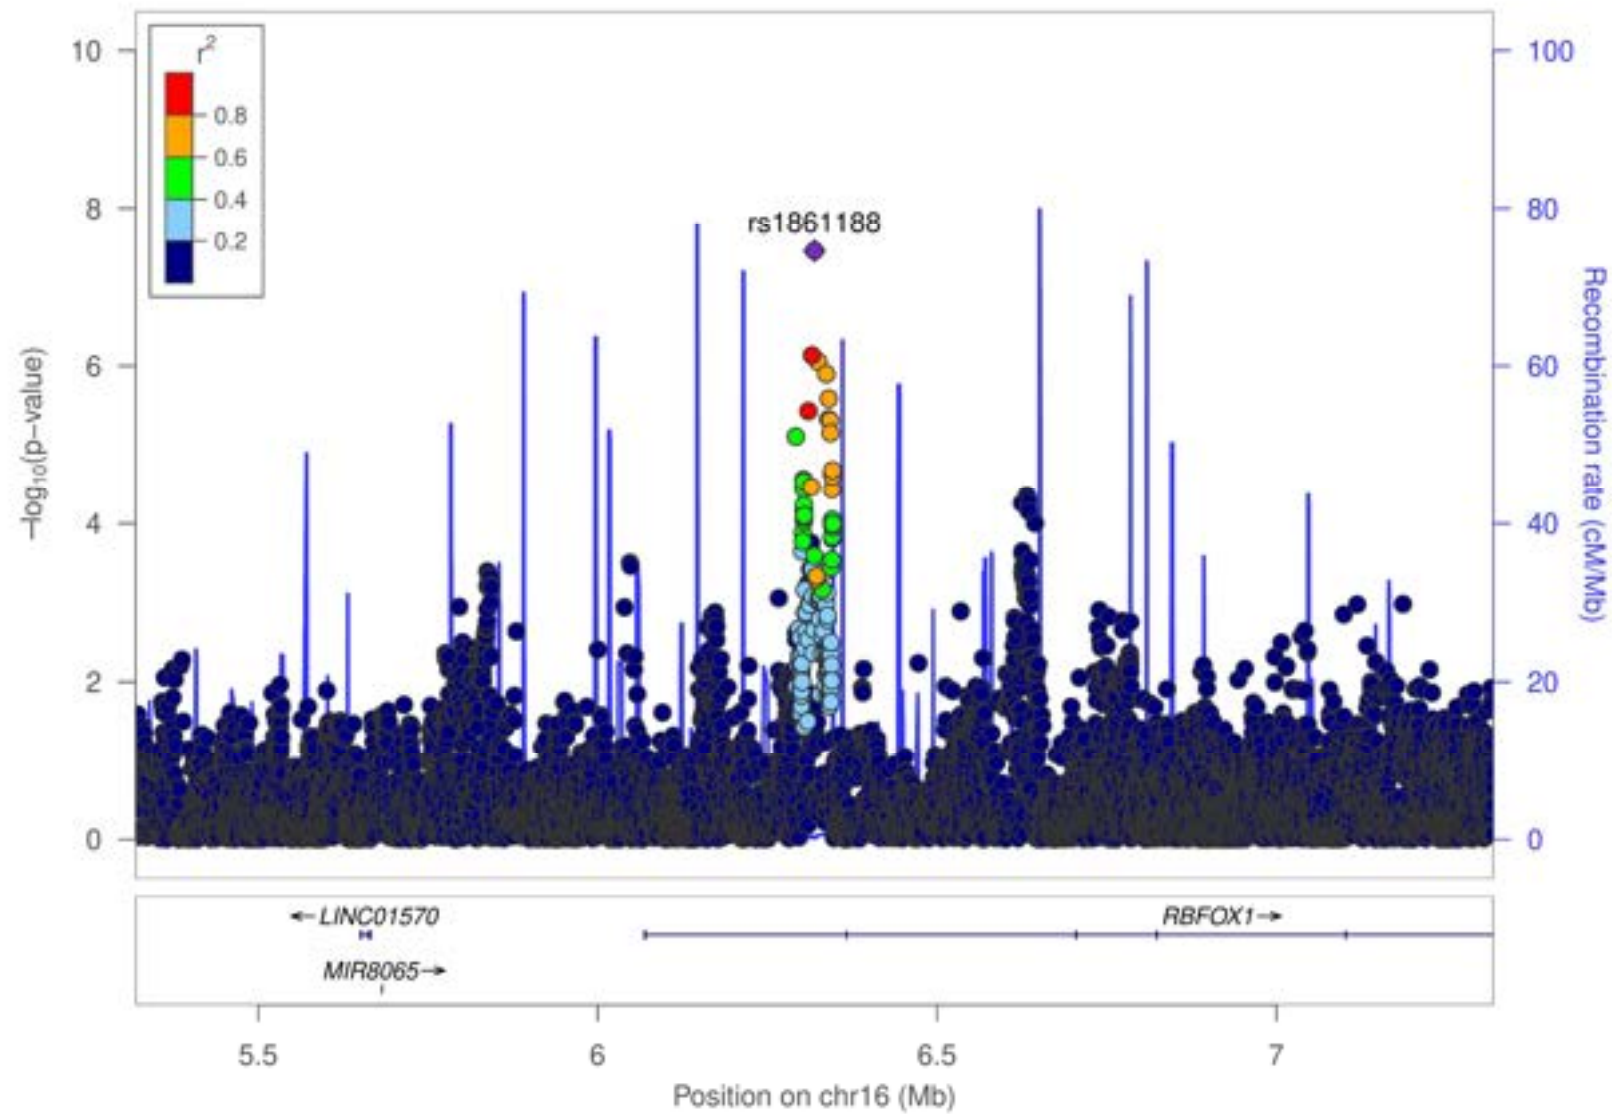

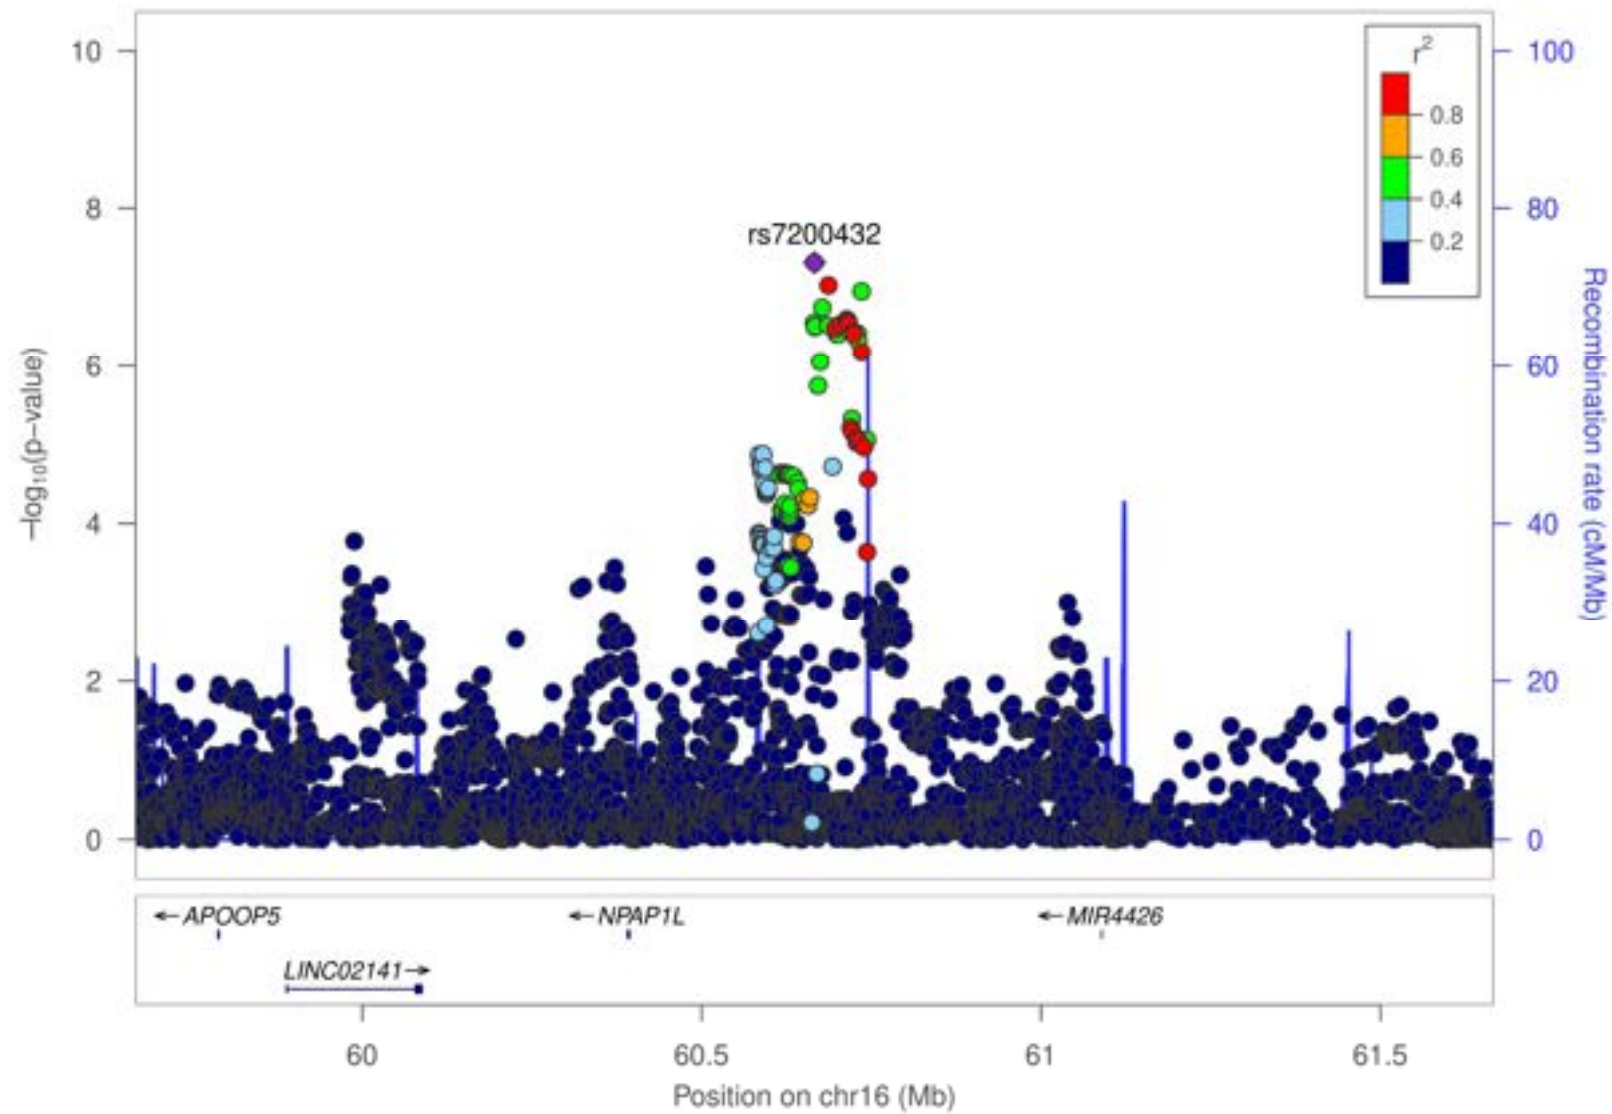

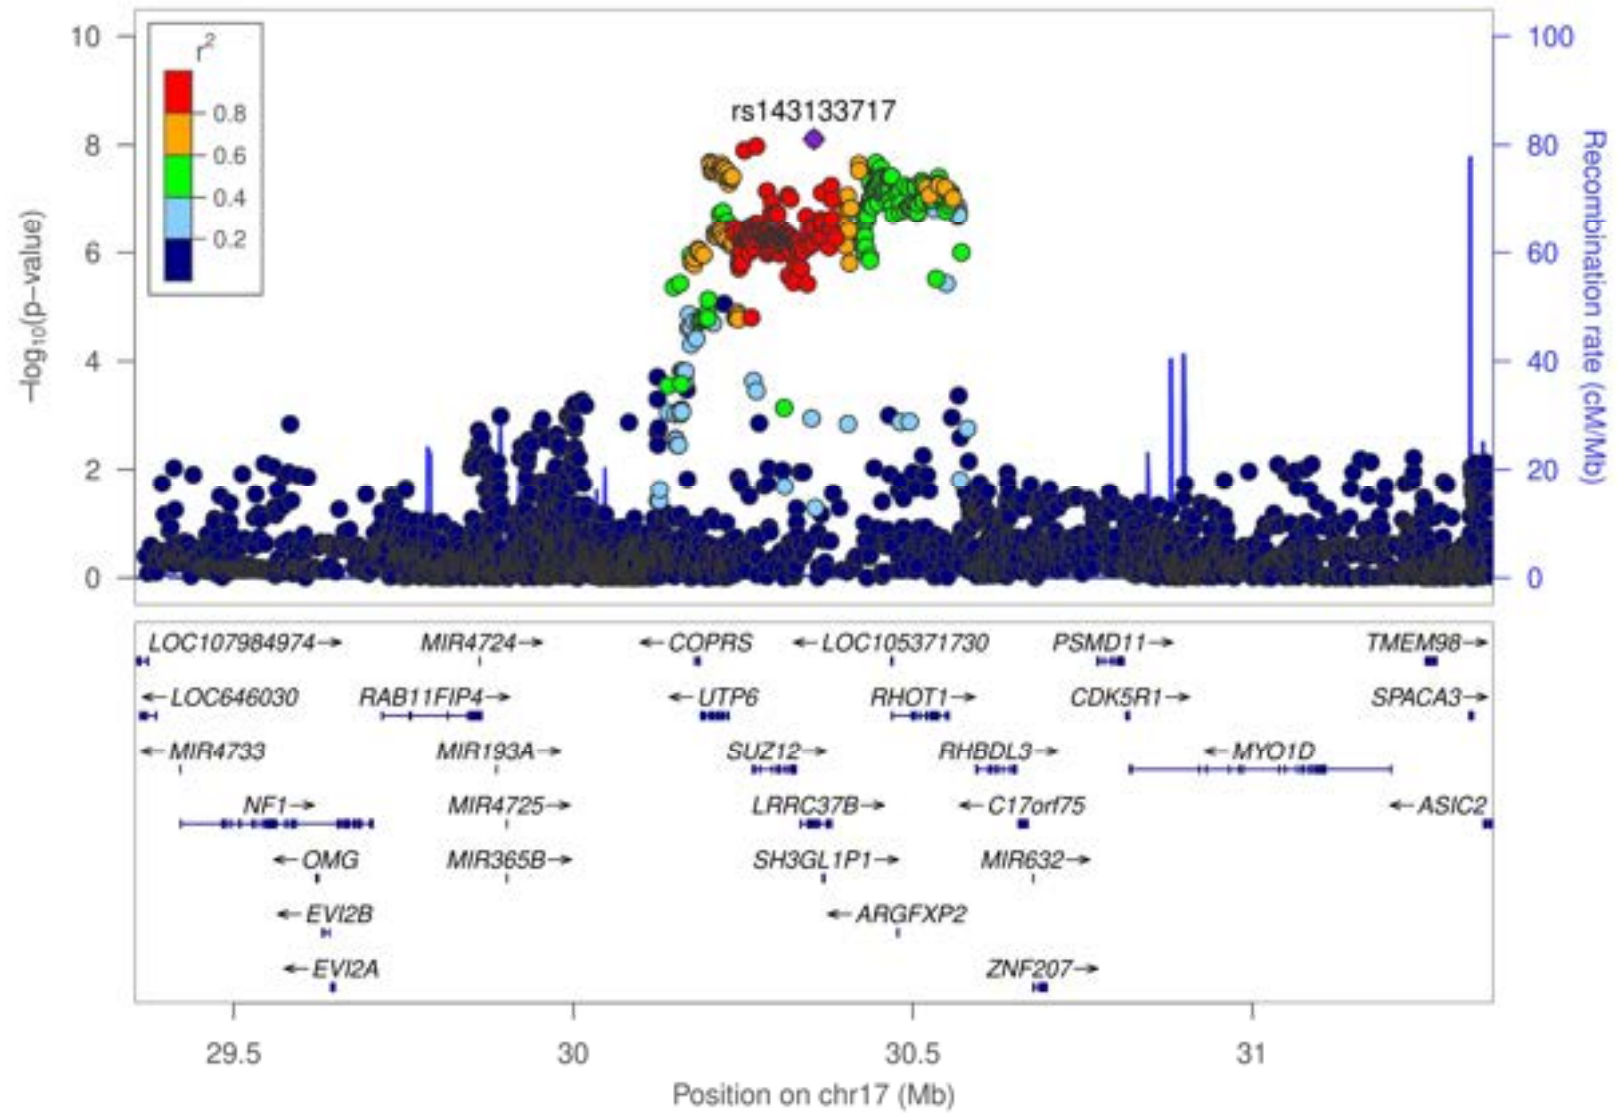

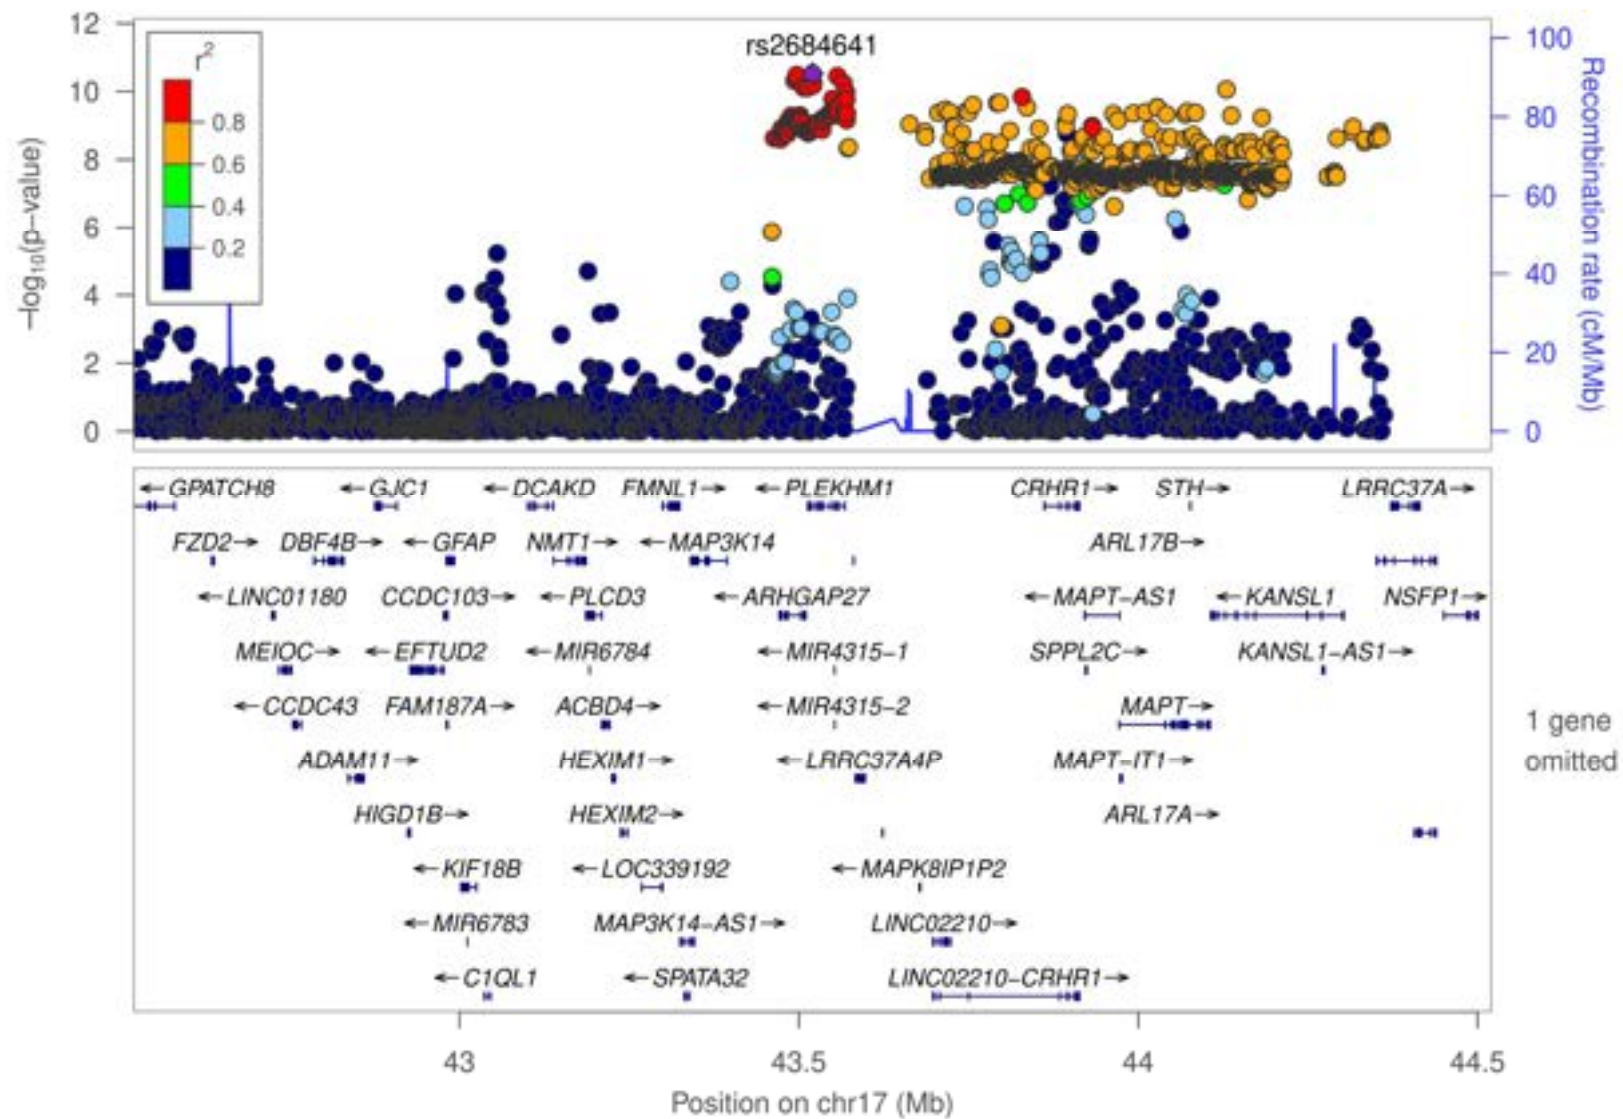

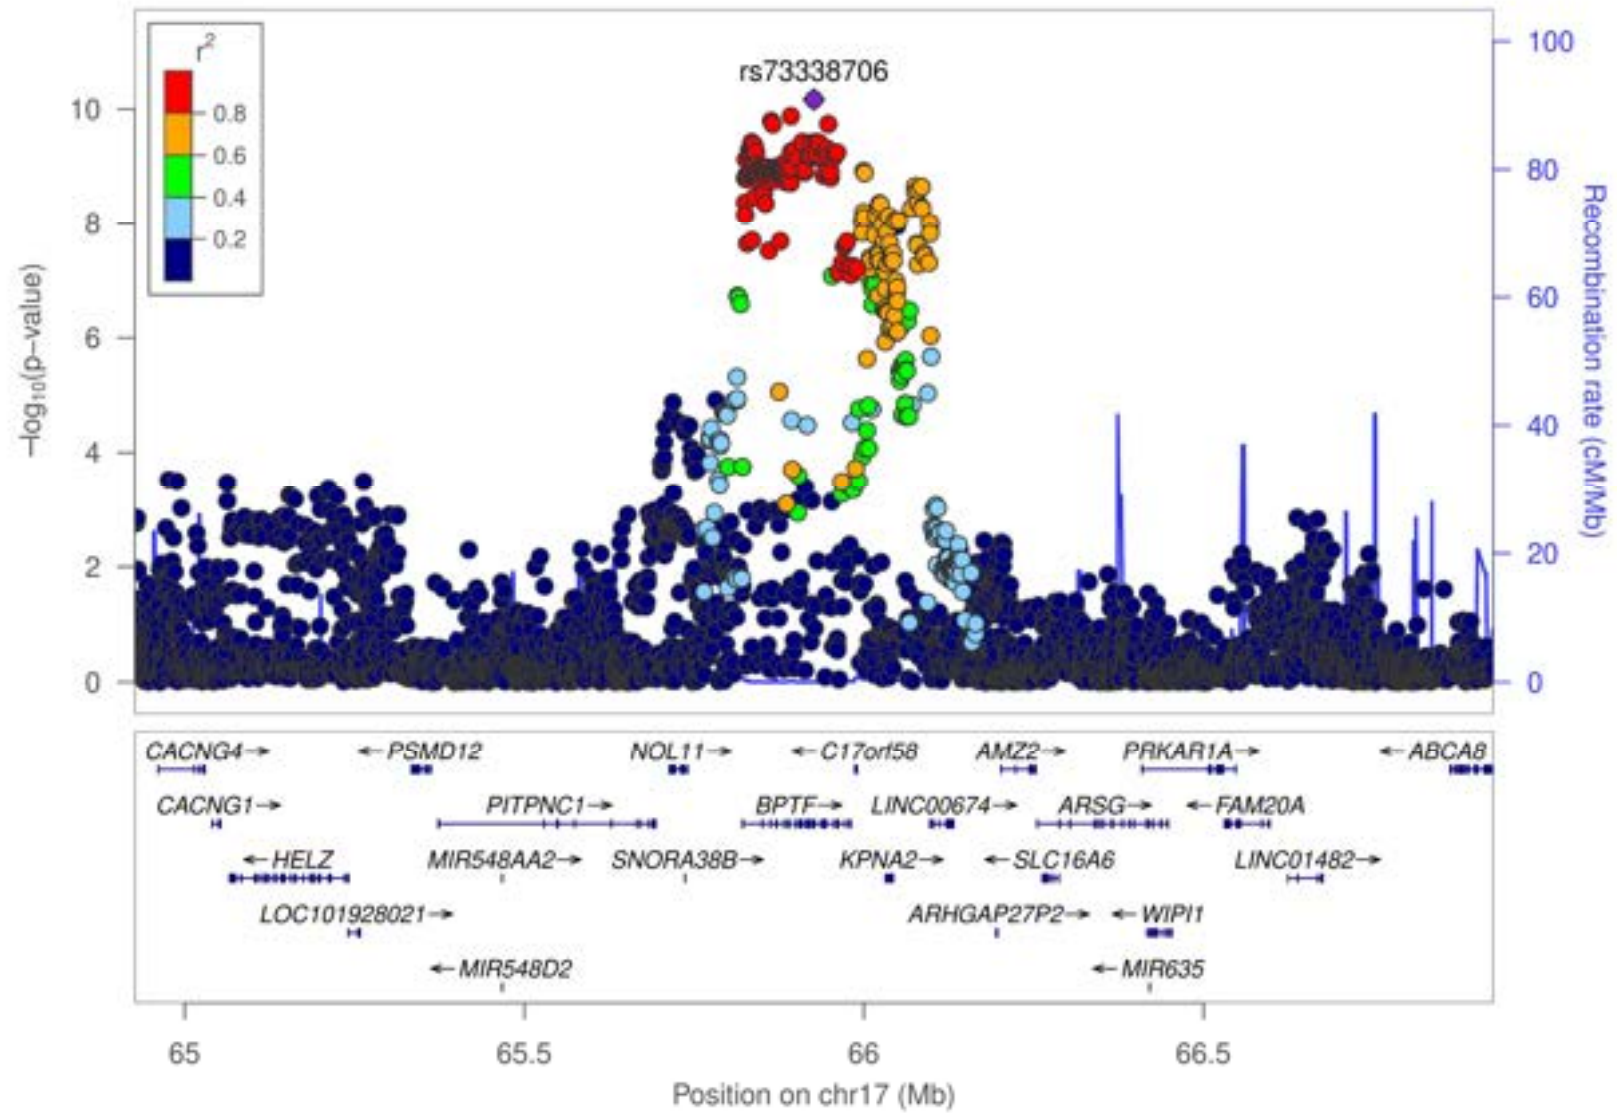



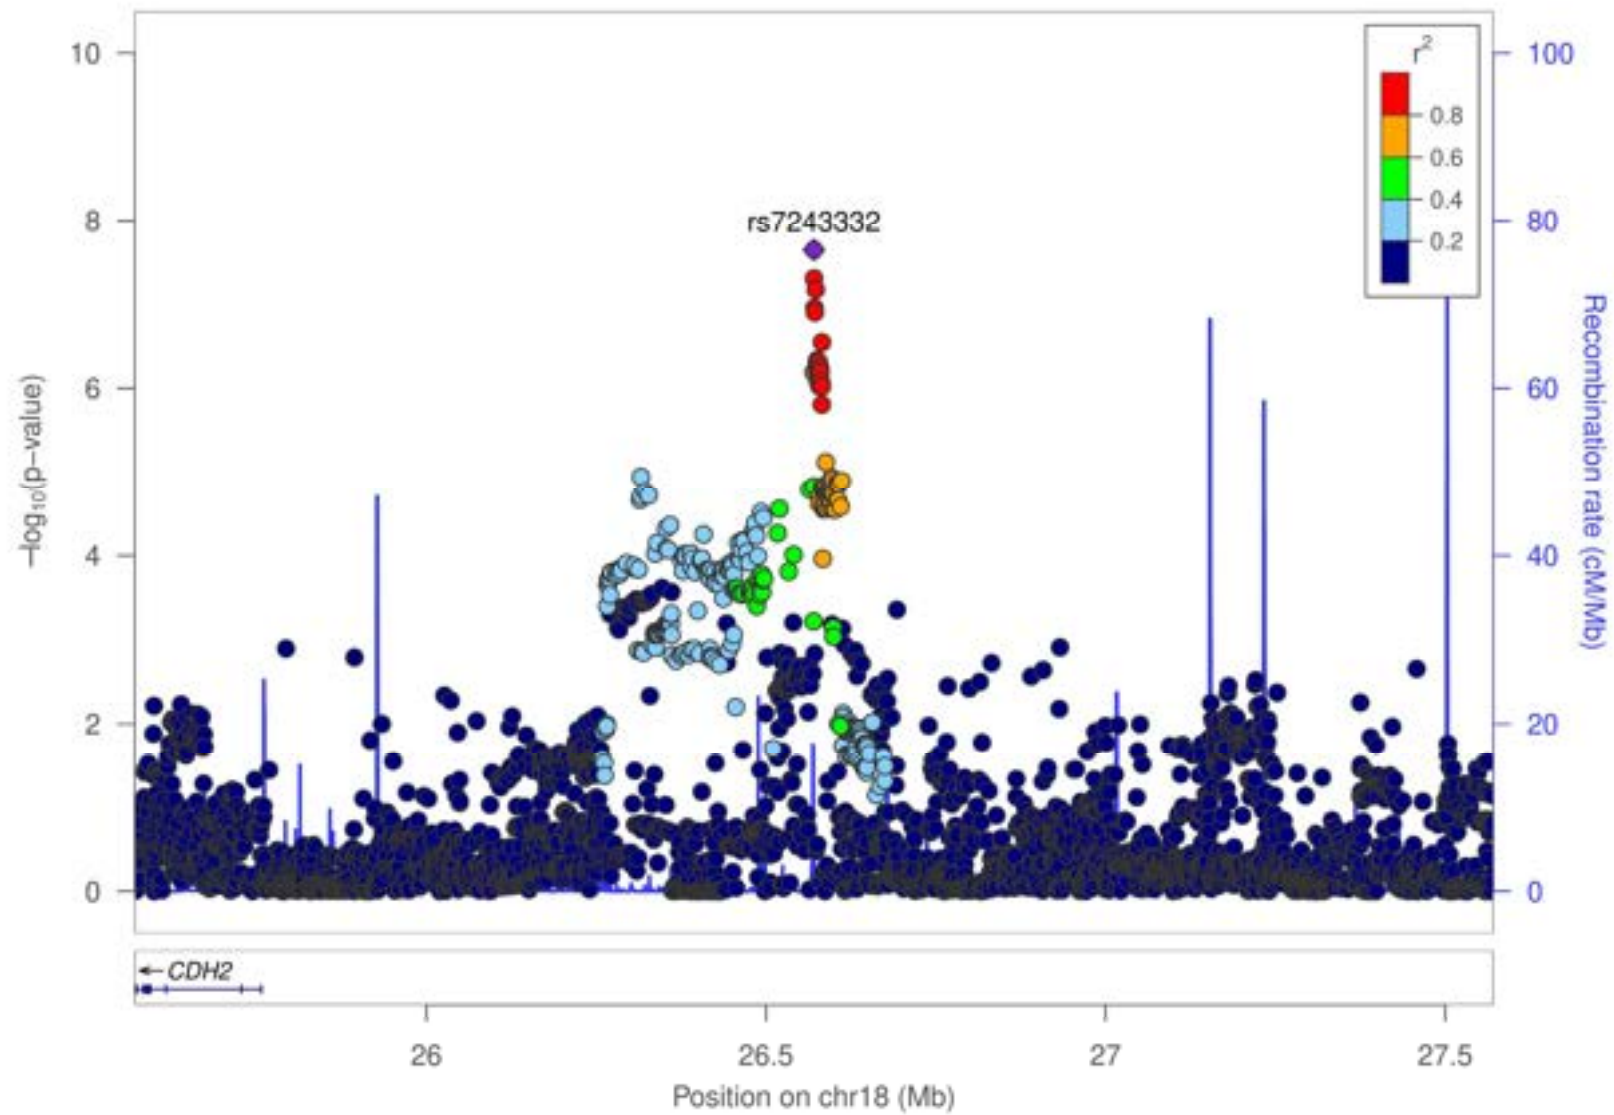

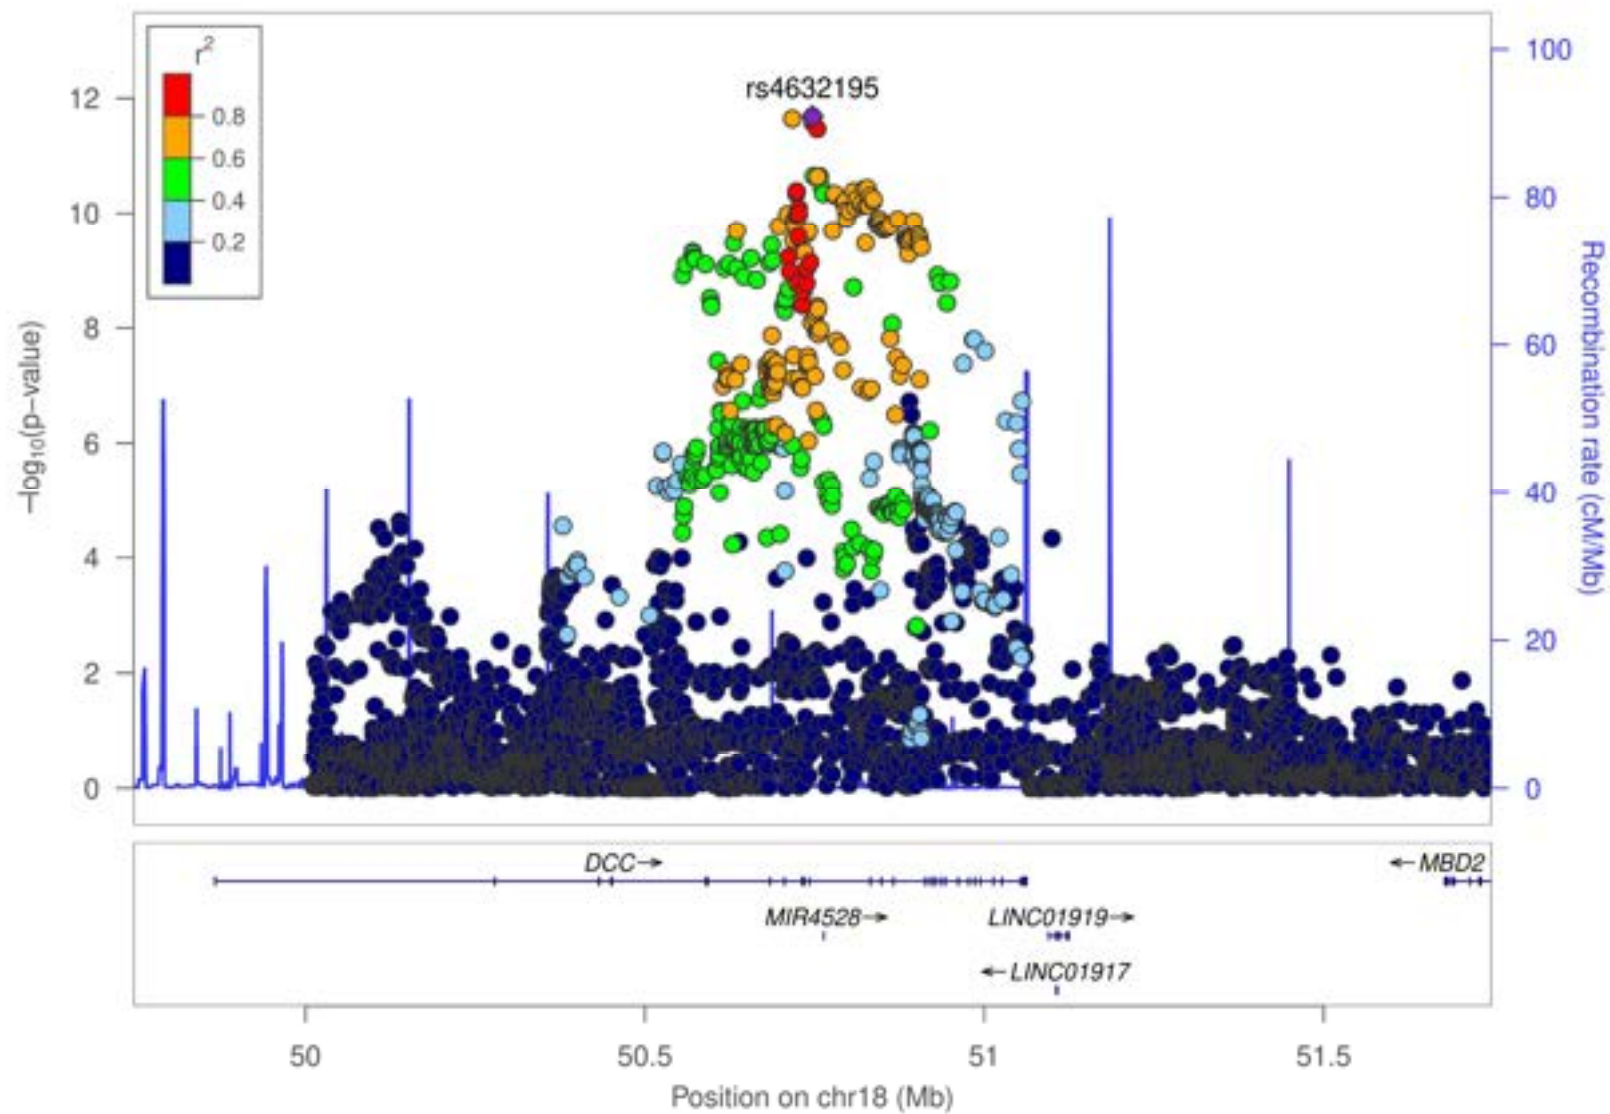

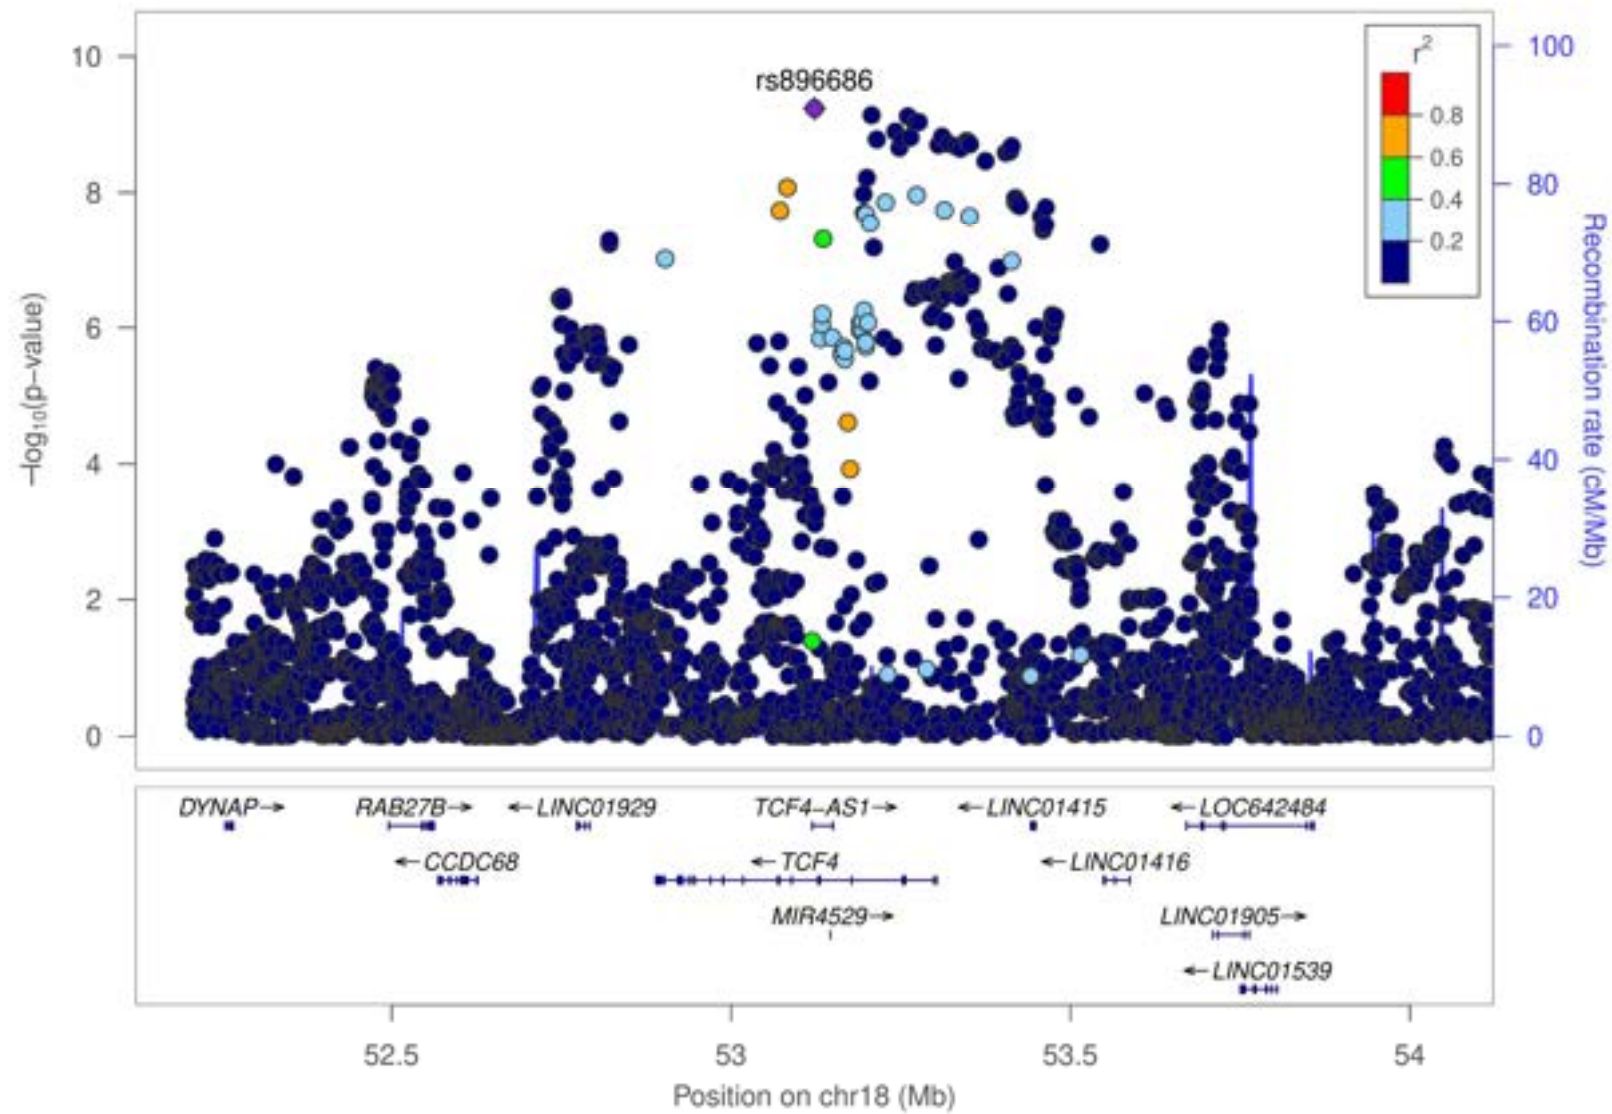

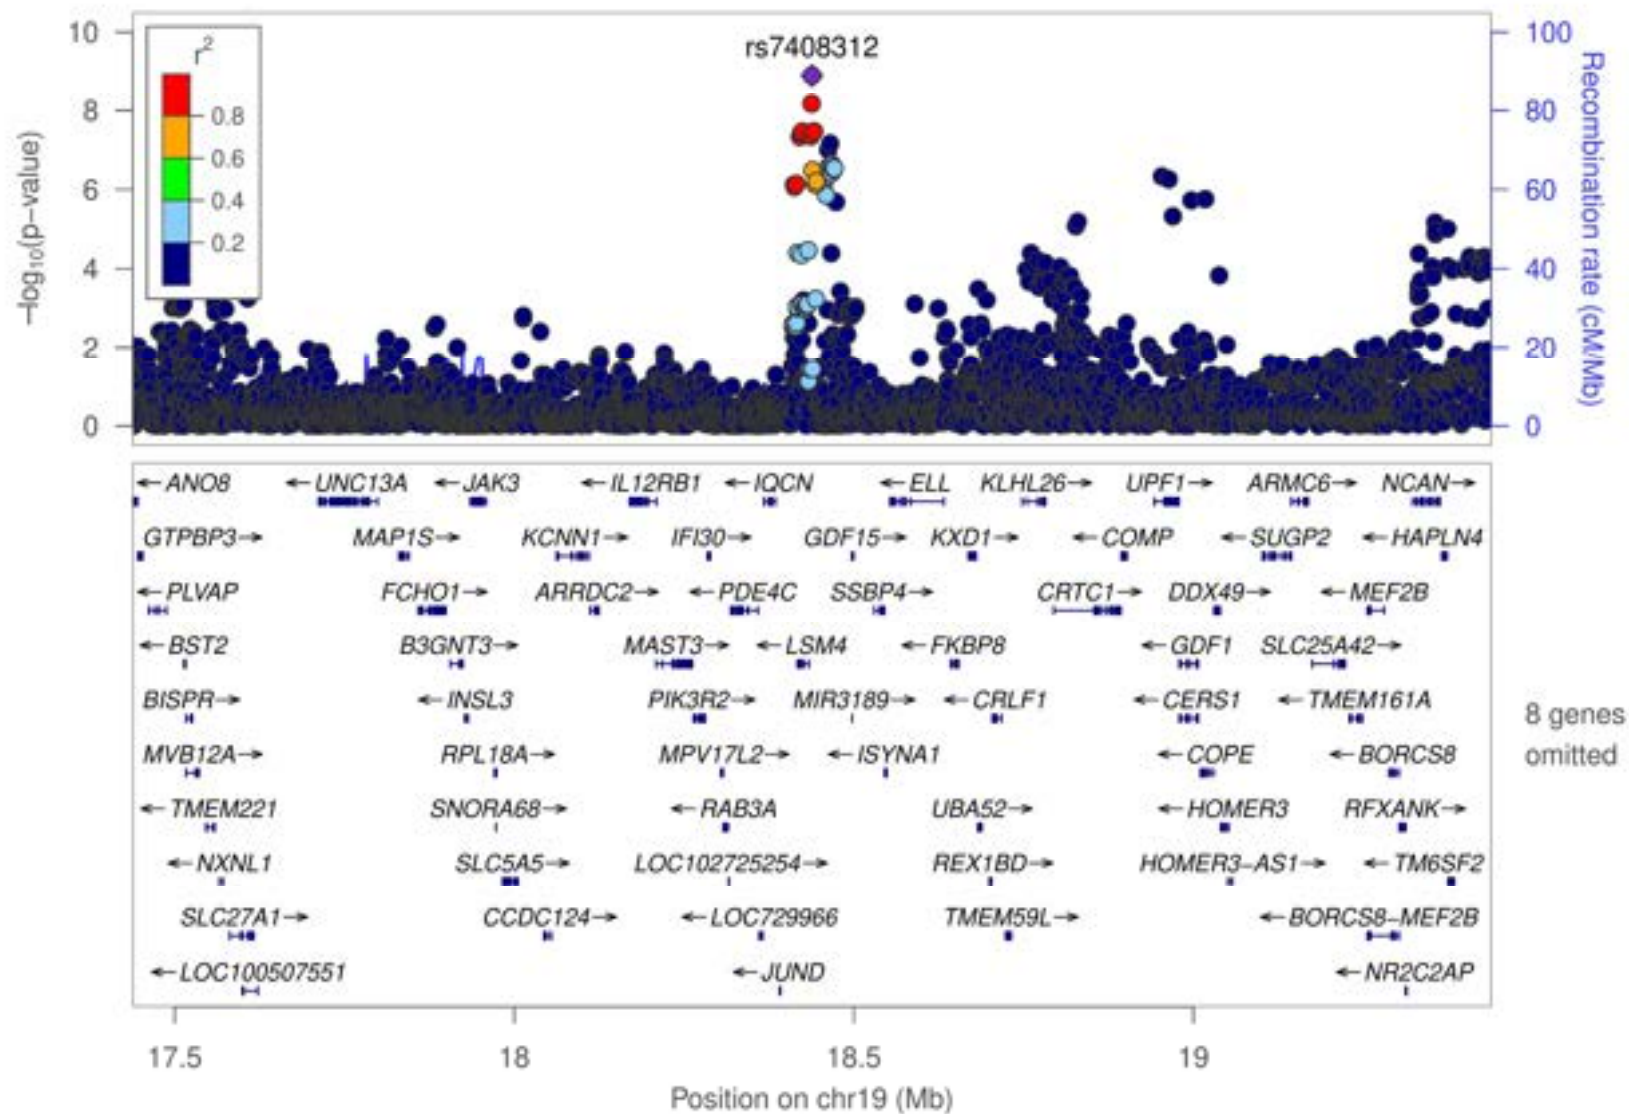

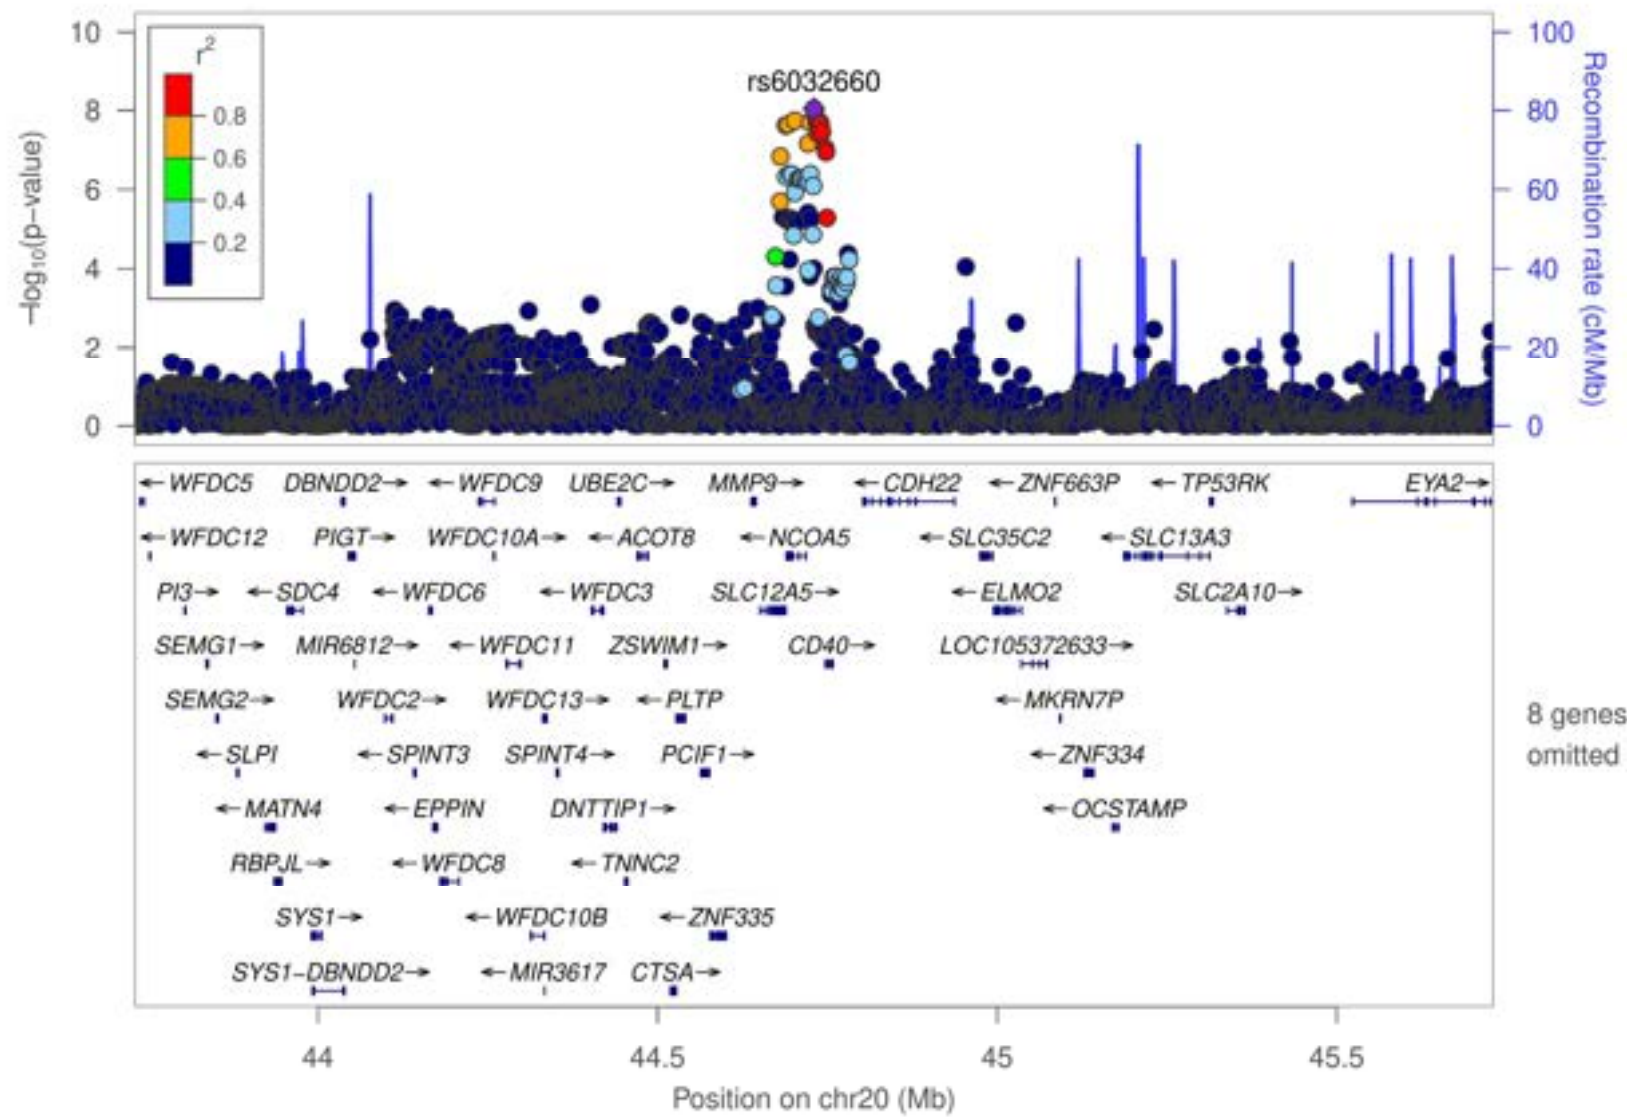

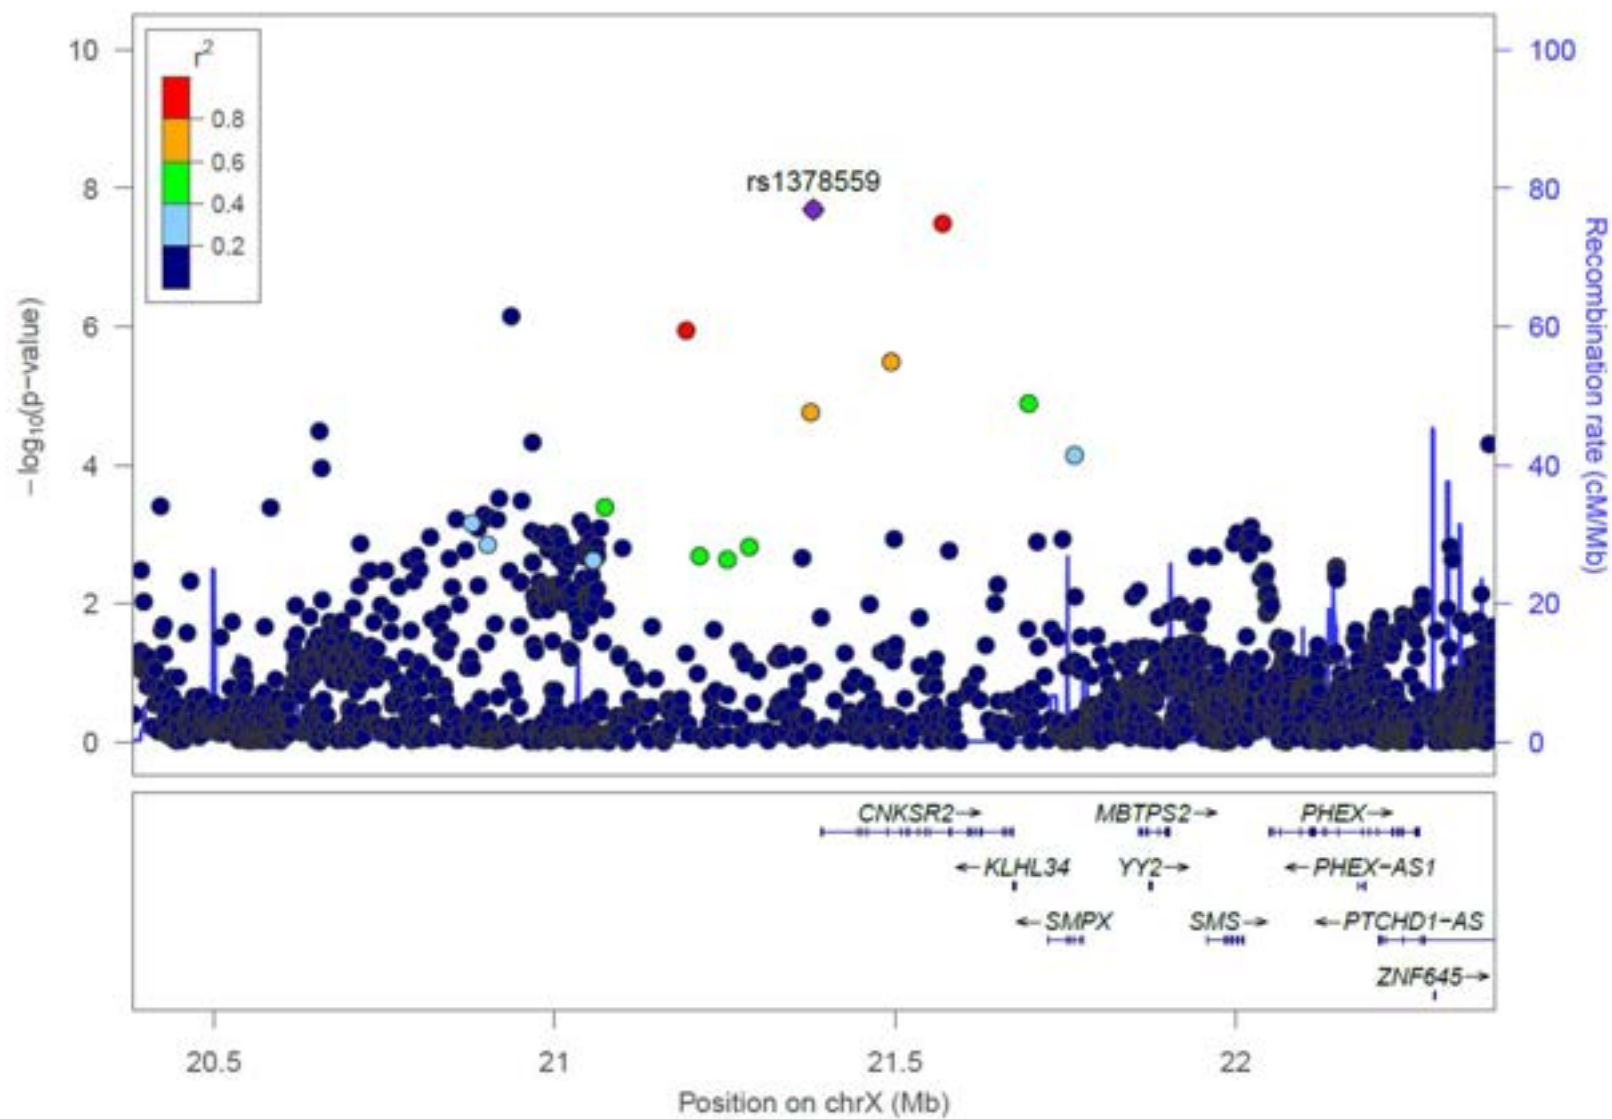

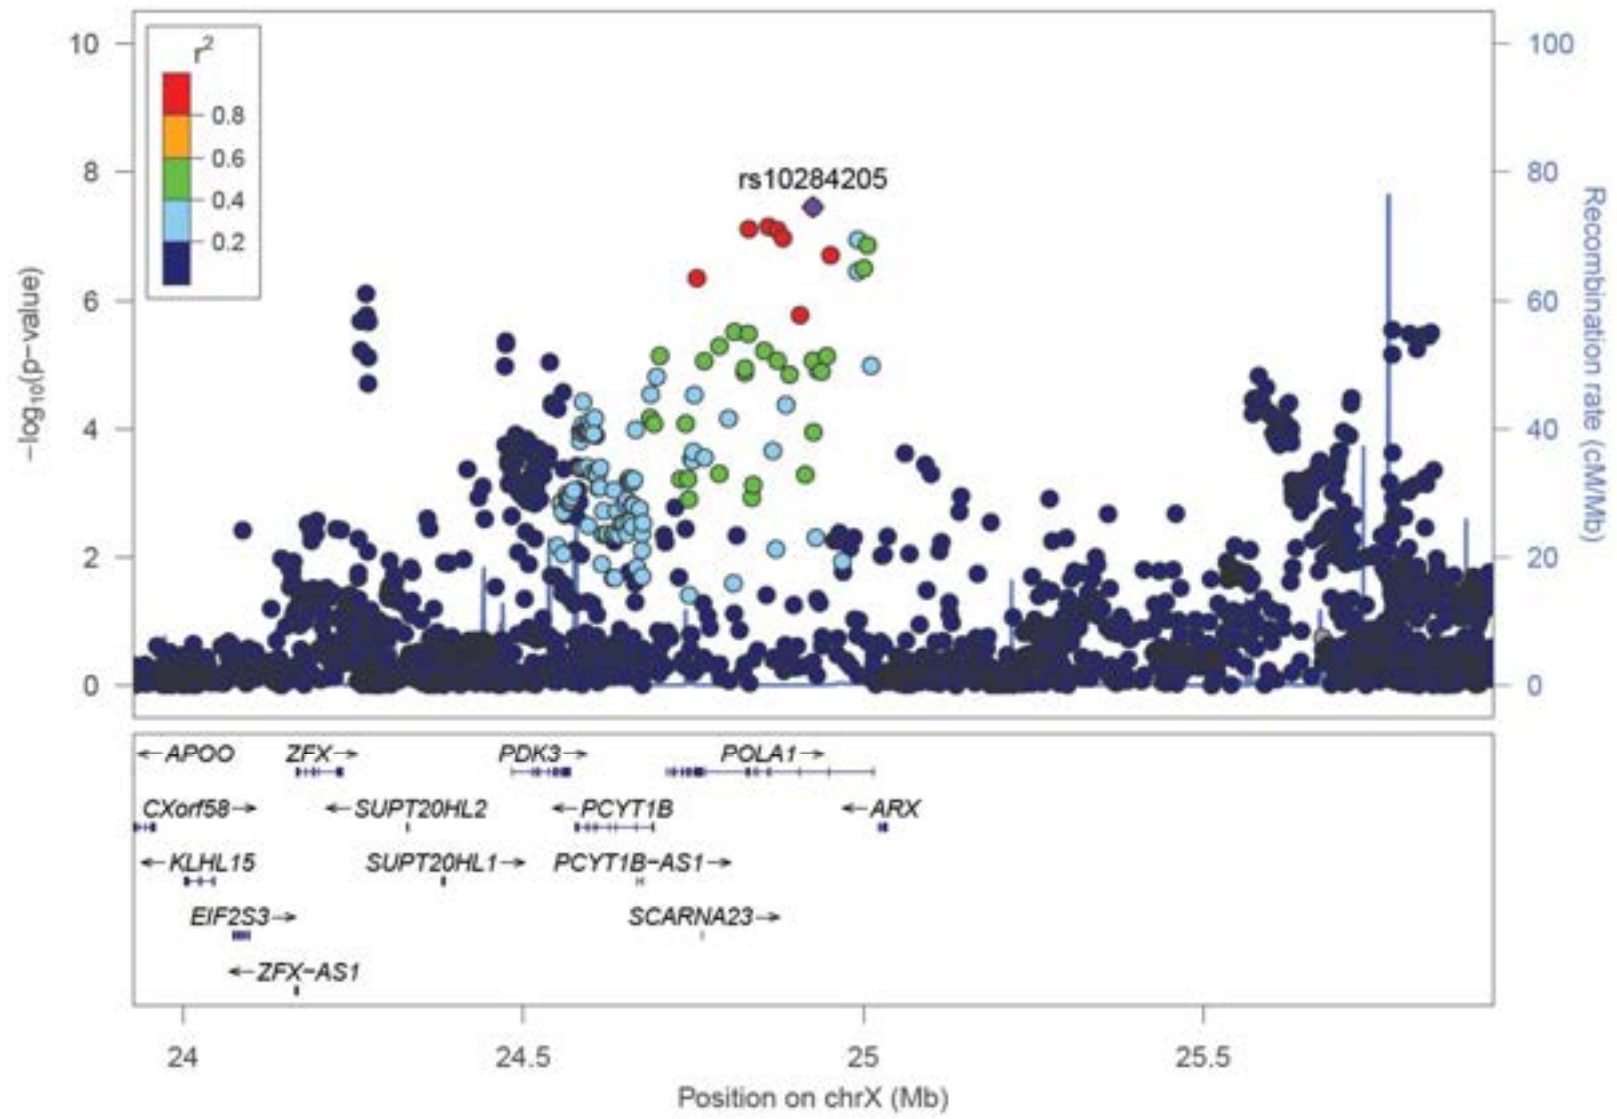

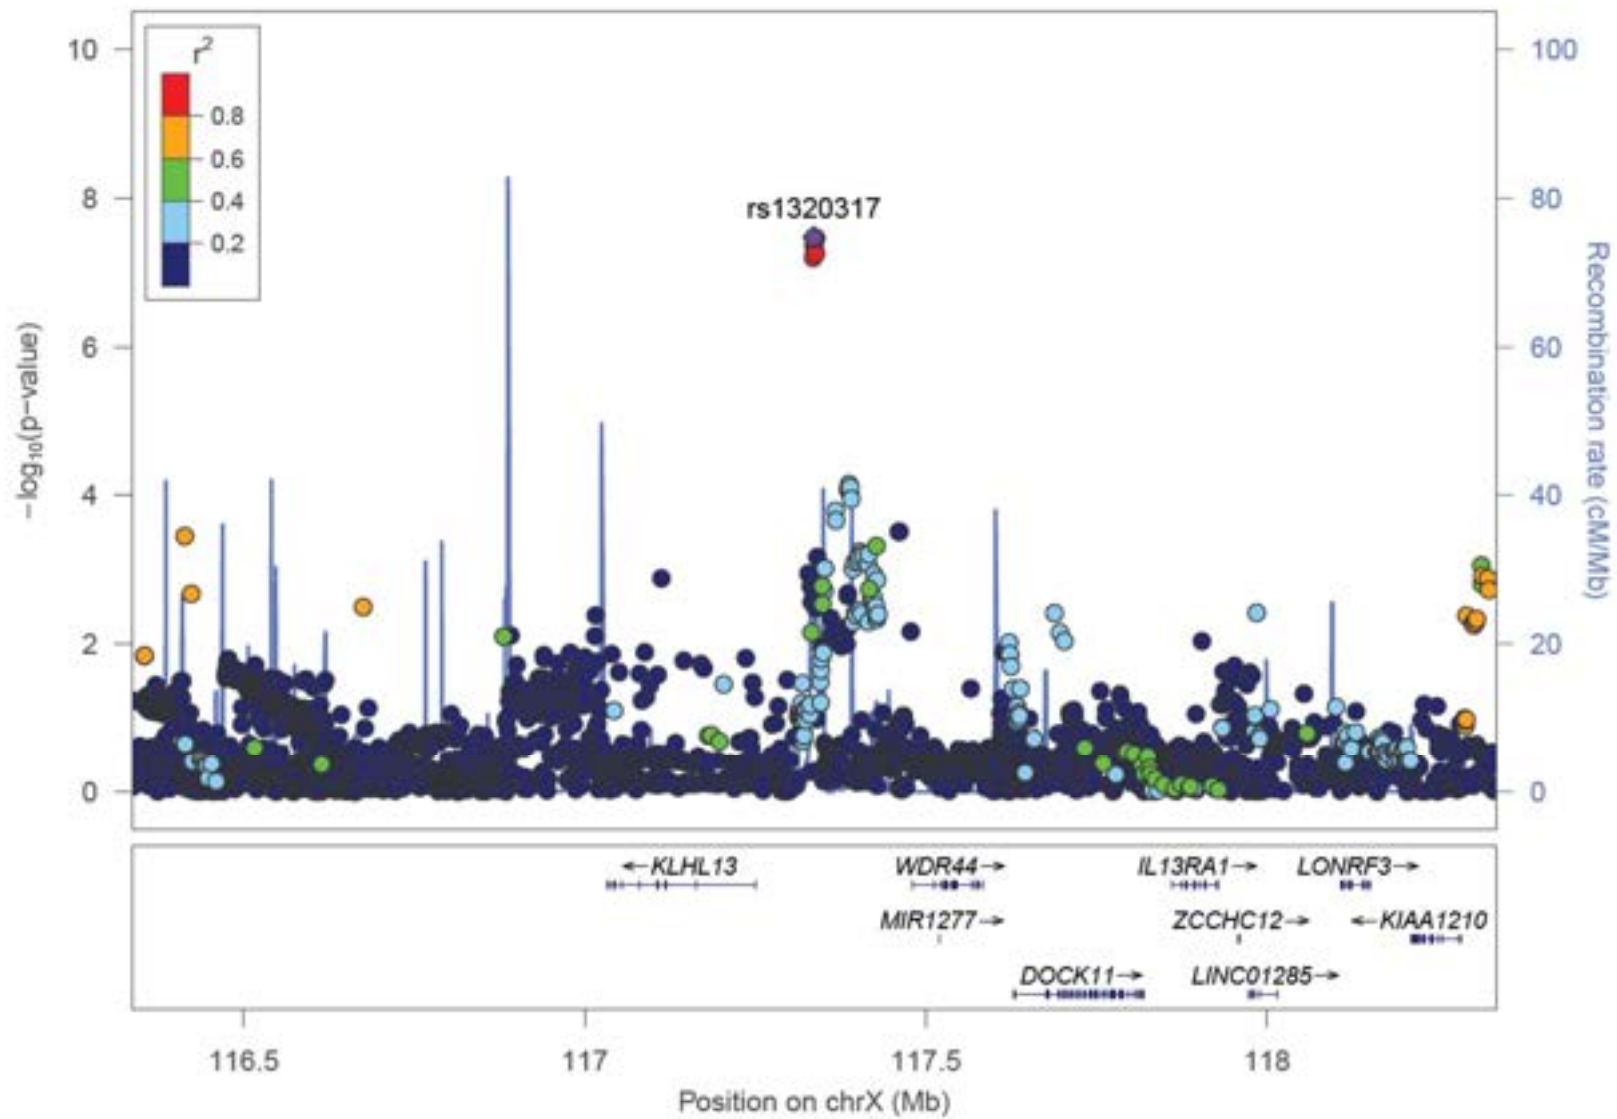



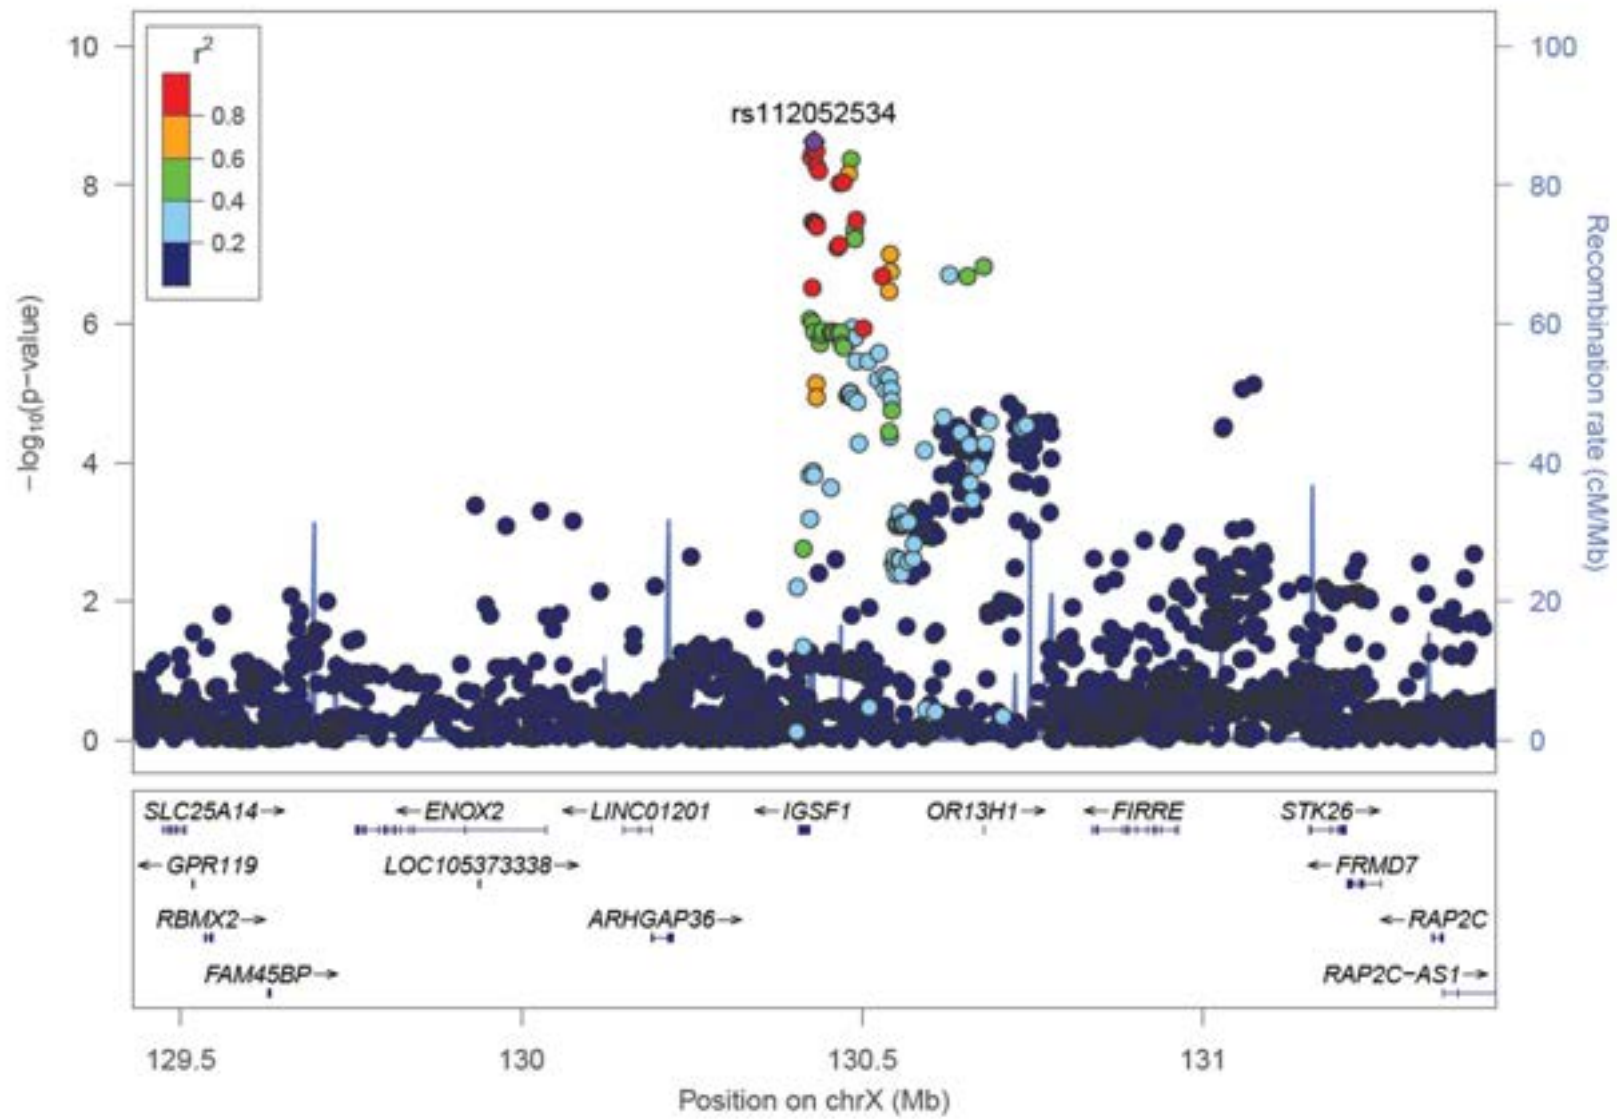

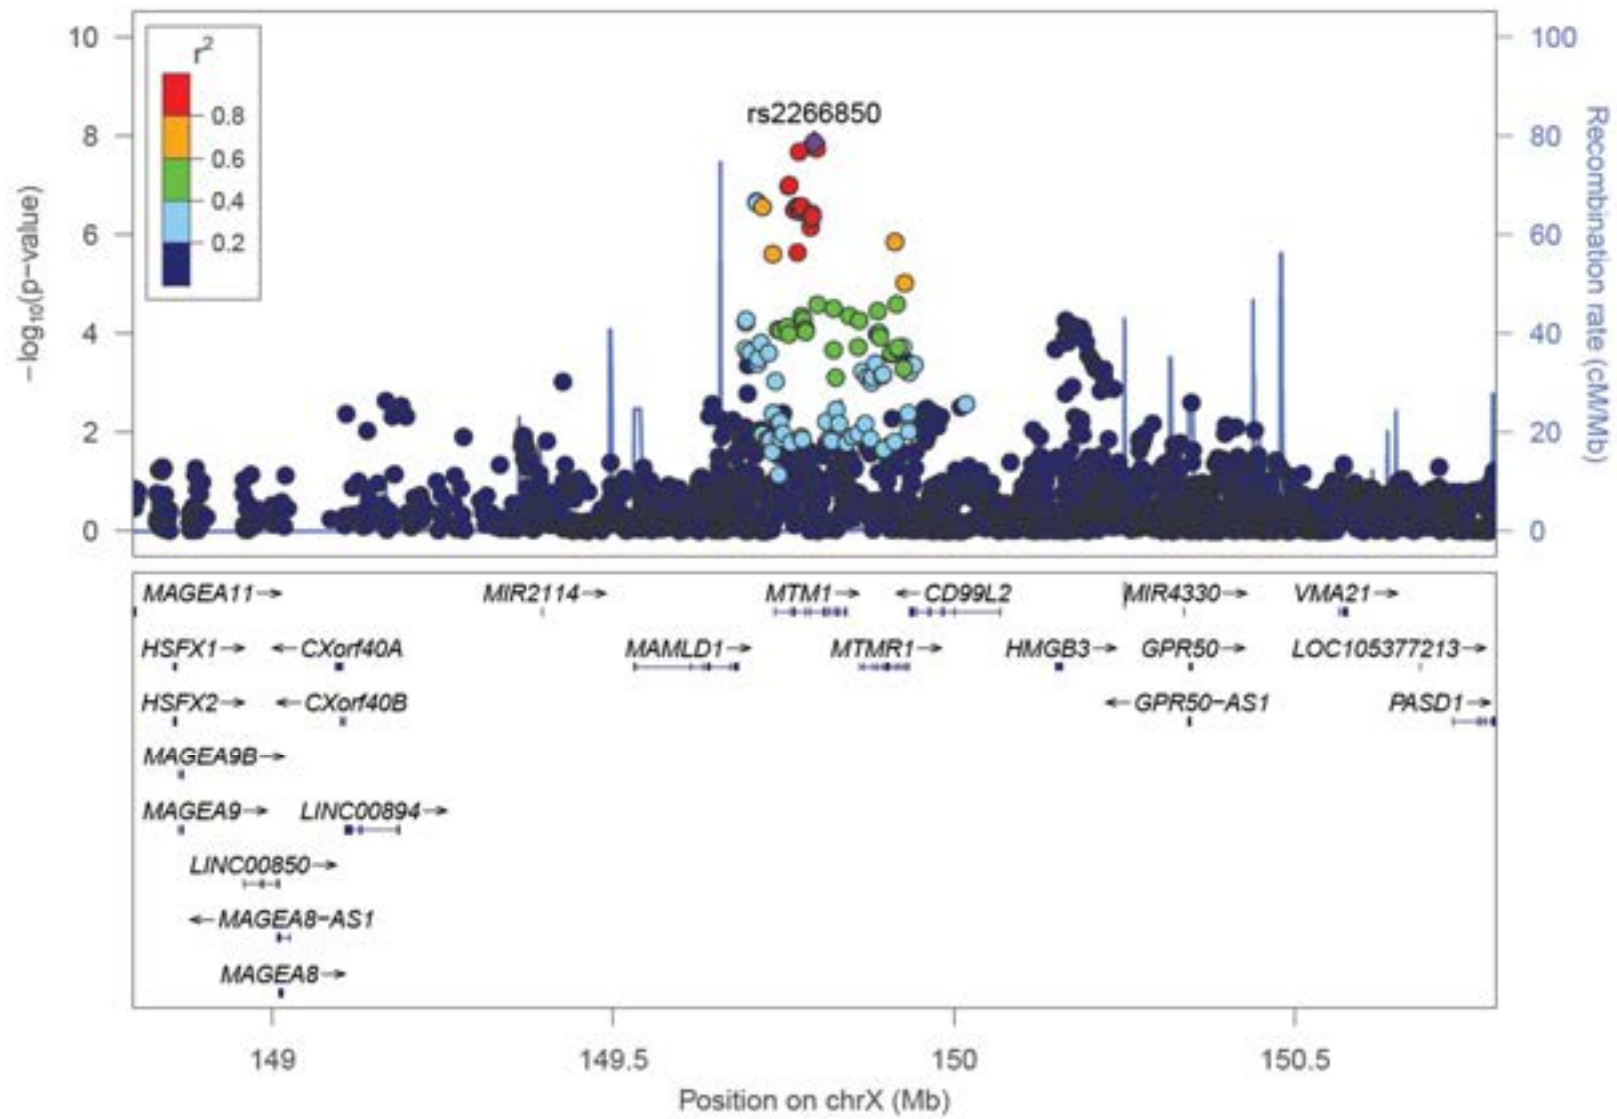

Supplement: NIHMS2015499-supplement-Supplementary_Data_1.pdf [file NIHMS2015499-supplement-Supplementary_Data_1.pdf]
